# Supplementary material for: Gene by Sex Interaction for Measures of Obesity in the Framingham Heart Study
Source: Hindawi journal article supplement (doi:10.1155/2011/329038), 2010-12-26
Supplement: f1 [file 329038.f1.pdf]

### S1.3 Generation 2 Waist to Hip Ratio GxS Consensus Hits

| rs <sup>a</sup> | Chromosome | Coordinate | Exam 4 Rank | Exam 4 P-value | Exam 4 Rank | Exam 4 P-value | Closest Gene                      |
|-----------------|------------|------------|-------------|----------------|-------------|----------------|-----------------------------------|
| rs10022681      | 4          | 97114273   | 823         | 0.0018         | 27          | 4.11E-05       | RP11-61G24.1;OTTHUMG000000160944  |
| rs1009376       | 9          | 77706531   | 497         | 0.0011         | 235         | 4.00E-04       | OSTF1;OTTHUMG000000020033         |
| rs10499263      | 6          | 150836603  | 8           | 1.28E-05       | 551         | 0.0012         | RP11-291C6.1;OTTHUMG000000015820  |
| rs10499264      | 6          | 150861034  | 34          | 6.80E-05       | 886         | 0.0019         | RP11-291C6.1;OTTHUMG000000015820  |
| rs12420605      | 11         | 13082472   | 604         | 0.0013         | 315         | 6.00E-04       | RASSF10                           |
| rs13097853      | 3          | 16573140   | 677         | 0.0015         | 442         | 9.00E-04       | OTTHUMG000000157049;RP11-194G10.1 |
| rs1331897       | 9          | 28486207   | 57          | 1.00E-04       | 398         | 8.00E-04       | LINGO2;OTTHUMG000000019721        |
| rs1492536       | 4          | 167449789  | 42          | 1.00E-04       | 85          | 1.00E-04       | RP11-217C7.1;OTTHUMG000000161810  |
| rs16841134      | 1          | 158784017  | 37          | 8.27E-05       | 211         | 4.00E-04       | OR10AA1P;OTTHUMG000000022779      |
| rs17079846      | 6          | 150868346  | 13          | 2.15E-05       | 837         | 0.0019         | RP11-291C6.1;OTTHUMG000000015820  |
| rs17519053      | 4          | 167428985  | 60          | 2.00E-04       | 420         | 9.00E-04       | RP11-217C7.1;OTTHUMG000000161810  |
| rs17585055      | 8          | 16679361   | 492         | 0.0011         | 371         | 7.00E-04       | AC079193.1                        |
| rs17647232      | 2          | 59790889   | 944         | 0.0021         | 361         | 7.00E-04       | AC007131.2;OTTHUMG000000152614    |
| rs17647256      | 2          | 59790940   | 467         | 0.001          | 397         | 8.00E-04       | AC007131.2;OTTHUMG000000152614    |
| rs17721860      | 5          | 58406871   | 581         | 0.0013         | 37          | 4.89E-05       | PDE4D;OTTHUMG000000162218         |
| rs1977240       | 9          | 77710789   | 96          | 2.00E-04       | 317         | 6.00E-04       | OSTF1;OTTHUMG000000020033         |
| rs2072657       | 9          | 4576451    | 155         | 3.00E-04       | 791         | 0.0018         | OTTHUMG000000019468;SLC1A1        |
| rs2216325       | 2          | 56440166   | 959         | 0.0021         | 417         | 9.00E-04       | CCDC85A;OTTHUMG000000152033       |
| rs2268702       | 6          | 52447280   | 849         | 0.0019         | 860         | 0.0019         | OTTHUMG000000014849;RP1-180E22.3  |
| rs348692        | 12         | 62423566   | 818         | 0.0018         | 391         | 8.00E-04       | FAM19A2                           |
| rs3742262       | 13         | 42442546   | 980         | 0.0022         | 826         | 0.0018         | OTTHUMG000000016799;KIAA0564      |
| rs4323319       | 6          | 150831746  | 11          | 1.54E-05       | 560         | 0.0012         | RP11-291C6.1;OTTHUMG000000015820  |
| rs4684284       | 3          | 16560348   | 538         | 0.0012         | 613         | 0.0013         | RFTN1;OTTHUMG000000156973         |
| rs4691298       | 4          | 167510528  | 49          | 1.00E-04       | 373         | 8.00E-04       | RP11-217C7.1;OTTHUMG000000161810  |
| rs4761798       | 12         | 52867714   | 198         | 4.00E-04       | 946         | 0.0021         | KRT6C                             |
| rs4775968       | 15         | 51980821   | 141         | 3.00E-04       | 497         | 0.0011         | SCG3;OTTHUMG000000131748          |
| rs4977127       | 8          | 144172757  | 344         | 7.00E-04       | 711         | 0.0016         | RP11-520P18.1;OTTHUMG000000158696 |
| rs498226        | 3          | 196686287  | 724         | 0.0016         | 772         | 0.0017         | PIGZ;OTTHUMG000000155522          |
| rs564584        | 11         | 122181591  | 840         | 0.0019         | 940         | 0.0021         | AP001835.1                        |
| rs6824615       | 4          | 167425316  | 163         | 3.00E-04       | 172         | 3.00E-04       | RP11-217C7.1;OTTHUMG000000161810  |
