# Supplementary material for: Gene by Sex Interaction for Measures of Obesity in the Framingham Heart Study
Source: Hindawi journal article supplement (doi:10.1155/2011/329038), 2010-12-26
Supplement: f2 [file 329038.f2.pdf]

### S2.4 Waist Circumference GxS Top 1000 Hits - Generation 3 Exam 1

| rs <sup>a</sup> | P-value  | Chromosome | Coordinate | Closest Gene                     | Distance To Gene |
|-----------------|----------|------------|------------|----------------------------------|------------------|
| rs2111330       | 1.17E-06 | 12         | 107630378  | AC007649.1                       | 34722            |
| rs7976575       | 2.09E-06 | 12         | 107634542  | AC007649.1                       | 30558            |
| rs3783332       | 3.10E-06 | 14         | 100586757  | EVL                              | 0                |
| rs2181102       | 6.03E-06 | 14         | 100583949  | EVL                              | 0                |
| rs7680982       | 1.12E-05 | 4          | 98007179   | C4orf37;OTTHUMG00000131009       | 149616           |
| rs8083046       | 1.47E-05 | 18         | 74474843   | AC027575.1                       | 37777            |
| rs12086509      | 1.52E-05 | 1          | 200324163  | OTTHUMG00000035722;C1orf98       | 0                |
| rs17753403      | 1.64E-05 | 19         | 30581795   | AC008507.1                       | 52704            |
| rs6817647       | 1.94E-05 | 4          | 46832562   | OTTHUMG00000099423;COX7B2        | 0                |
| rs4732342       | 3.88E-05 | 7          | 138673422  | KIAA1549;OTTHUMG00000157214      | -7358            |
| rs4075859       | 3.91E-05 | 4          | 97991960   | C4orf37;OTTHUMG00000131009       | 164835           |
| rs7797152       | 4.30E-05 | 7          | 138677481  | KIAA1549;OTTHUMG00000157214      | -11417           |
| rs35043991      | 4.72E-05 | 4          | 97998668   | C4orf37;OTTHUMG00000131009       | 158127           |
| rs9855470       | 4.94E-05 | 3          | 52493275   | NISCH;OTTHUMG00000158571         | 0                |
| rs7207282       | 4.94E-05 | 17         | 11588869   | DNAH9;OTTHUMG00000130383         | 0                |
| rs4970469       | 5.37E-05 | 1          | 27312816   | OTTHUMG00000004276;RP11-344H11.6 | 0                |
| rs6005209       | 5.50E-05 | 22         | 27253020   | RP1-90L6.2;OTTHUMG00000150979    | -1577            |
| rs2191078       | 6.32E-05 | 17         | 11586923   | DNAH9;OTTHUMG00000130383         | 0                |
| rs4741904       | 6.51E-05 | 9          | 4176178    | OTTHUMG00000019463;GLIS3         | 0                |
| rs1011062       | 6.96E-05 | 3          | 52506903   | NISCH;OTTHUMG00000158571         | 0                |
| rs6445486       | 7.57E-05 | 3          | 52506491   | NISCH;OTTHUMG00000158571         | 0                |
| rs822354        | 7.79E-05 | 3          | 186480206  | OTTHUMG00000156575;RP11-573D15.7 | 642              |
| rs10497576      | 7.90E-05 | 2          | 182123841  | OTTHUMG00000154205;AC104820.2    | 0                |
| rs1533236       | 8.05E-05 | 4          | 123564458  | OTTHUMG00000150127;AC053545.3    | 0                |
| rs10847957      | 8.69E-05 | 12         | 130315930  | TMEM132D                         | 0                |
| rs4732343       | 9.64E-05 | 7          | 138673567  | KIAA1549;OTTHUMG00000157214      | -7503            |
| rs7697884       | 0.0001   | 4          | 5070657    | STK32B;OTTHUMG00000090423        | 0                |
| rs12065528      | 0.0001   | 1          | 85746162   | OTTHUMG00000010579;RP11-131L23.1 | 0                |
| rs10490135      | 0.0001   | 2          | 169893879  | ABCB11;OTTHUMG00000154039        | -6047            |
| rs2642420       | 0.0001   | 1          | 220977650  | OTTHUMG00000037353;MOSC1         | 0                |
| rs16831778      | 0.0001   | 2          | 200541688  | AC093590.2;OTTHUMG00000154492    | 16236            |
| rs919505        | 0.0001   | 2          | 222199604  | OTTHUMG00000133142;EPA4          | 83143            |
| rs6810027       | 0.0001   | 3          | 52524574   | NISCH;OTTHUMG00000158571         | 0                |

|            |        |    |           |                                  |         |
|------------|--------|----|-----------|----------------------------------|---------|
| rs2541891  | 0.0001 | 12 | 107578281 | AC007649.1                       | 86819   |
| rs13403114 | 0.0001 | 2  | 169898016 | ABCB11;OTTHUMG00000154039        | -10184  |
| rs8023231  | 0.0001 | 14 | 95935176  | C14orf49                         | 0       |
| rs769989   | 0.0001 | 1  | 56066503  | OTTHUMG00000008246;RP11-466L17.1 | 0       |
| rs494696   | 0.0001 | 1  | 108081910 | AC114491.1                       | 31551   |
| rs934286   | 0.0001 | 2  | 222200205 | OTTHUMG00000133142;EPHA4         | 82542   |
| rs254340   | 0.0001 | 16 | 83794096  | AC009063.1                       | 0       |
| rs505822   | 0.0001 | 1  | 108087250 | AC114491.1                       | 26211   |
| rs9457189  | 0.0001 | 6  | 167006019 | RPS6KA2;OTTHUMG00000016007       | 0       |
| rs2161500  | 0.0001 | 5  | 56944366  | CTD-2023N9.3;OTTHUMG00000162504  | 31108   |
| rs3852935  | 0.0001 | 20 | 6143180   | OTTHUMG00000031829;TARDBPL       | 38456   |
| rs11698118 | 0.0001 | 20 | 40919680  | OTTHUMG00000033040;PTPRT         | 0       |
| rs2343114  | 0.0002 | 4  | 109110907 | RP11-558N14.1;OTTHUMG00000161028 | 0       |
| rs12670134 | 0.0002 | 7  | 78112998  | MAGI2                            | 0       |
| rs17600699 | 0.0002 | 17 | 11554185  | DNAH9;OTTHUMG00000130383         | 0       |
| rs7578485  | 0.0002 | 2  | 229743009 | OTTHUMG00000153591;AC007677.1    | 124507  |
| rs17527619 | 0.0002 | 10 | 72355806  | OTTHUMG00000018412;PRF1          | 1298    |
| rs2269429  | 0.0002 | 6  | -9        | N/A                              | -9      |
| rs229101   | 0.0002 | 21 | 28224836  | ADAMTS1;OTTHUMG00000078688       | -7108   |
| rs17065243 | 0.0002 | 4  | 178744050 | RP11-162G9.1;OTTHUMG00000160725  | 0       |
| rs747391   | 0.0002 | 4  | 5992086   | C4orf50;OTTHUMG00000149971       | -712    |
| rs822355   | 0.0002 | 3  | 186480123 | OTTHUMG00000156575;RP11-573D15.7 | 559     |
| rs9880089  | 0.0002 | 3  | 144988393 | RP11-622L21.1;OTTHUMG00000159390 | -252932 |
| rs10148930 | 0.0002 | 14 | 100600803 | EVL                              | 0       |
| rs4305466  | 0.0002 | 4  | 178735786 | RP11-162G9.1;OTTHUMG00000160725  | 0       |
| rs446947   | 0.0002 | 2  | 17712696  | RAD51AP2;OTTHUMG00000151761      | -1009   |
| rs6053962  | 0.0002 | 20 | 6176915   | OTTHUMG00000031829;TARDBPL       | 4721    |
| rs4997952  | 0.0002 | 4  | 178740532 | RP11-162G9.1;OTTHUMG00000160725  | 0       |
| rs10513153 | 0.0002 | 5  | 13770000  | DNAH5;OTTHUMG00000090533         | 0       |
| rs6588567  | 0.0002 | 1  | 56059425  | OTTHUMG00000008246;RP11-466L17.1 | 0       |
| rs2823976  | 0.0002 | 21 | 18057633  | AP000473.1                       | -33684  |
| rs28461669 | 0.0002 | 4  | 98005555  | C4orf37;OTTHUMG00000131009       | 151240  |
| rs10741228 | 0.0002 | 10 | 129152153 | DOCK1;OTTHUMG00000019249         | 0       |
| rs426590   | 0.0002 | 2  | 17738199  | OTTHUMG00000090645;VSNL1         | 0       |
| rs2708629  | 0.0002 | 1  | 8454792   | RERE;OTTHUMG00000001765          | 0       |
| rs10015378 | 0.0002 | 4  | 178736851 | RP11-162G9.1;OTTHUMG00000160725  | 0       |
| rs1368943  | 0.0002 | 2  | 206033222 | PARD3B;OTTHUMG00000154562        | 0       |

|            |        |    |           |                                  |         |
|------------|--------|----|-----------|----------------------------------|---------|
| rs1497137  | 0.0003 | 4  | 142962843 | INPP4B;OTTHUMG00000161341        | 0       |
| rs17324338 | 0.0003 | 7  | 3825425   | OTTHUMG00000151733;SDK1          | 0       |
| rs1265759  | 0.0003 | 6  | -9        | N/A                              | -9      |
| rs981854   | 0.0003 | 13 | 61652909  | RP11-196P2.1;OTTHUMG00000017010  | 160770  |
| rs13422432 | 0.0003 | 2  | 206031987 | PARD3B;OTTHUMG00000154562        | 0       |
| rs1368944  | 0.0003 | 2  | 206033290 | PARD3B;OTTHUMG00000154562        | 0       |
| rs2126314  | 0.0003 | 3  | 28701116  | AC109586.1;OTTHUMG00000155718    | 0       |
| rs2068406  | 0.0003 | 6  | 165275152 | OTTHUMG00000015982;RP11-300M24.1 | 32046   |
| rs2975842  | 0.0003 | 8  | 73925591  | TERF1P3                          | 0       |
| rs6044855  | 0.0003 | 20 | 17488944  | BFSP1;OTTHUMG00000031940         | 0       |
| rs2883332  | 0.0003 | 5  | 21635568  | OTTHUMG00000161915;RP11-823P9.1  | 90682   |
| rs11784638 | 0.0003 | 8  | 131422473 | ASAP1                            | -8256   |
| rs7748405  | 0.0003 | 6  | 165377914 | OTTHUMG00000015982;RP11-300M24.1 | 134808  |
| rs7748425  | 0.0003 | 6  | 165377947 | OTTHUMG00000015982;RP11-300M24.1 | 134841  |
| rs6062314  | 0.0003 | 20 | 62409713  | ZBTB46;OTTHUMG00000033001        | 0       |
| rs11619095 | 0.0003 | 13 | 61655038  | RP11-196P2.1;OTTHUMG00000017010  | 162899  |
| rs10779702 | 0.0003 | 1  | 8423510   | RERE;OTTHUMG00000001765          | 0       |
| rs7485210  | 0.0003 | 12 | 131638853 | AC126564.1                       | -10703  |
| rs13415503 | 0.0003 | 2  | 206037412 | PARD3B;OTTHUMG00000154562        | 0       |
| rs2961787  | 0.0003 | 5  | 3013033   | RP11-35O7.1;OTTHUMG00000161607   | 45291   |
| rs3893408  | 0.0003 | 9  | 121127354 | OTTHUMG00000020565;RP11-442A13.1 | -281694 |
| rs471766   | 0.0003 | 6  | 116461477 | COL10A1;OTTHUMG00000015426       | 0       |
| rs12527078 | 0.0003 | 6  | 165275011 | OTTHUMG00000015982;RP11-300M24.1 | 31905   |
| rs11832852 | 0.0003 | 12 | 5367801   | NTF3                             | -173479 |
| rs301791   | 0.0003 | 1  | 8468372   | RERE;OTTHUMG00000001765          | 0       |
| rs980369   | 0.0003 | 12 | 126765125 | AC005868.1                       | -161902 |
| rs626611   | 0.0003 | 8  | 79936774  | IL7                              | -219016 |
| rs6562153  | 0.0003 | 13 | 61652128  | RP11-196P2.1;OTTHUMG00000017010  | 159989  |
| rs10004704 | 0.0003 | 4  | 182757801 | AC093669.1                       | -1540   |
| rs7487651  | 0.0003 | 12 | 131636966 | GPR133                           | 10960   |
| rs9327340  | 0.0003 | 5  | 124260544 | RP11-284A20.1;OTTHUMG00000162992 | 3253    |
| rs1398795  | 0.0003 | 4  | 93124994  | RP11-562F9.1;OTTHUMG00000160921  | -19791  |
| rs6914630  | 0.0003 | 6  | 78840944  | AL050340.1                       | 193956  |
| rs2166539  | 0.0003 | 2  | 134611868 | AC011243.1                       | 257898  |
| rs6717535  | 0.0003 | 2  | 217258563 | OTTHUMG00000154843;AC098820.2    | 0       |
| rs7768422  | 0.0003 | 6  | 110796405 | SLC22A16;OTTHUMG00000016171      | 0       |
| rs10983996 | 0.0003 | 9  | 121117742 | OTTHUMG00000020565;RP11-442A13.1 | -272082 |

|            |        |    |           |                                  |         |
|------------|--------|----|-----------|----------------------------------|---------|
| rs4946713  | 0.0003 | 6  | 106374015 | AL596112.1                       | 21453   |
| rs6562154  | 0.0003 | 13 | 61652602  | RP11-196P2.1;OTTHUMG00000017010  | 160463  |
| rs7941885  | 0.0004 | 11 | 45781188  | AC044839.1                       | -11795  |
| rs9287077  | 0.0004 | 1  | 167071975 | OTTHUMG00000034434;DUSP27        | 0       |
| rs1785016  | 0.0004 | 11 | 115515326 | AP000997.1                       | -17423  |
| rs12588988 | 0.0004 | 14 | 94286525  | PRIMA1;OTTHUMG00000141313        | -31698  |
| rs6541160  | 0.0004 | 1  | 220981358 | OTTHUMG00000037353;MOSC1         | 0       |
| rs10791275 | 0.0004 | 11 | 132939770 | AP000843.2                       | 0       |
| rs4279608  | 0.0004 | 8  | 19508539  | CSGALNACT1;OTTHUMG00000130827    | 0       |
| rs4745506  | 0.0004 | 9  | 78745330  | PCSK5;OTTHUMG00000020039         | 0       |
| rs4596115  | 0.0004 | 3  | 57158685  | IL17RD;OTTHUMG00000150171        | 0       |
| rs4725928  | 0.0004 | 7  | 150392343 | OTTHUMG00000157488;GIMAP2        | 1614    |
| rs264883   | 0.0004 | 5  | 169177999 | DOCK2                            | 0       |
| rs9394727  | 0.0004 | 6  | 40715658  | OTTHUMG00000014664;RP11-570K4.1  | -32556  |
| rs6014133  | 0.0004 | 20 | 53300711  | OTTHUMG00000032778;DOK5          | 33001   |
| rs586180   | 0.0004 | 1  | 108088144 | AC114491.1                       | 25317   |
| rs6546118  | 0.0004 | 2  | 65212178  | SLC1A4;OTTHUMG00000129537        | -3401   |
| rs7548272  | 0.0004 | 1  | 56059283  | OTTHUMG00000008246;RP11-466L17.1 | 0       |
| rs1618710  | 0.0004 | 11 | 115515974 | AP000997.1                       | -18071  |
| rs10492043 | 0.0004 | 12 | 126779115 | AC005868.1                       | -147912 |
| rs7333868  | 0.0004 | 13 | 23504097  | AL157931.2                       | 10749   |
| rs11038646 | 0.0004 | 11 | 45788094  | AC044839.1                       | -4889   |
| rs6764475  | 0.0004 | 3  | 62184407  | PTPRG;OTTHUMG00000158660         | 0       |
| rs2068407  | 0.0004 | 6  | 165275367 | OTTHUMG00000015982;RP11-300M24.1 | 32261   |
| rs748419   | 0.0004 | 5  | 18714244  | CTD-2023M8.1;OTTHUMG00000161873  | 0       |
| rs943936   | 0.0004 | 9  | 38027644  | SHB;OTTHUMG00000019936           | 0       |
| rs7090191  | 0.0004 | 10 | 8486590   | RP11-543F8.2;OTTHUMG00000017648  | 0       |
| rs1145750  | 0.0004 | 6  | 91420973  | OTTHUMG00000015217;MAP3K7        | -124209 |
| rs9394733  | 0.0004 | 6  | 40753256  | OTTHUMG00000014664;RP11-570K4.1  | -70154  |
| rs1565833  | 0.0004 | 10 | 117142374 | OTTHUMG00000019096;ATRNL1        | 0       |
| rs2112888  | 0.0004 | 5  | 56943912  | CTD-2023N9.3;OTTHUMG00000162504  | 30654   |
| rs2485971  | 0.0004 | 10 | 117141509 | OTTHUMG00000019096;ATRNL1        | 0       |
| rs12318156 | 0.0004 | 12 | 126771267 | AC005868.1                       | -155760 |
| rs11038424 | 0.0004 | 11 | 45399905  | SYT13                            | -92021  |
| rs6436251  | 0.0004 | 2  | 222199541 | OTTHUMG00000133142;EPHA4         | 83206   |
| rs1687632  | 0.0004 | 16 | 86375805  | AC092327.1                       | 0       |
| rs368430   | 0.0004 | 2  | 17678048  | RAD51AP2;OTTHUMG00000151761      | 13802   |

|            |        |    |           |                                  |         |
|------------|--------|----|-----------|----------------------------------|---------|
| rs12546814 | 0.0004 | 8  | 105945047 | RP11-200A13.1;OTTHUMG00000158678 | 48345   |
| rs1339237  | 0.0004 | 9  | 78743151  | PCSK5;OTTHUMG00000020039         | 0       |
| rs981853   | 0.0005 | 13 | 61652874  | RP11-196P2.1;OTTHUMG00000017010  | 160735  |
| rs7071484  | 0.0005 | 10 | 23565895  | C10orf67;OTTHUMG00000017818      | 0       |
| rs1385110  | 0.0005 | 5  | 154843934 | AC010591.1                       | 55574   |
| rs11014149 | 0.0005 | 10 | 24838797  | KIAA1217;OTTHUMG00000017824      | 2025    |
| rs13120622 | 0.0005 | 4  | 139554116 | AC098859.1                       | -9362   |
| rs12469829 | 0.0005 | 2  | 222204827 | OTTHUMG00000133142;EPA4          | 77920   |
| rs13417480 | 0.0005 | 2  | 206033781 | PARD3B;OTTHUMG00000154562        | 0       |
| rs12458016 | 0.0005 | 18 | 12005826  | OTTHUMG00000131693;IMPA2         | 0       |
| rs340260   | 0.0005 | 3  | 158634689 | IQCJ;OTTHUMG00000158841          | -45335  |
| rs1295240  | 0.0005 | 5  | 154853855 | AC010591.1                       | 65495   |
| rs13384550 | 0.0005 | 2  | 163510554 | KCNH7;OTTHUMG00000132069         | 0       |
| rs17191809 | 0.0005 | 21 | 36444779  | RUNX1;OTTHUMG00000086299         | 0       |
| rs1879518  | 0.0005 | 14 | 48422343  | MDGA2;OTTHUMG00000029429         | -278390 |
| rs1484277  | 0.0005 | 5  | 154863737 | AC010591.1                       | 75377   |
| rs2926304  | 0.0005 | 2  | 30976058  | CAPN13;OTTHUMG00000152053        | 0       |
| rs4148814  | 0.0005 | 7  | 87091543  | ABCB4;OTTHUMG00000023396;MDR3    | 0       |
| rs17759304 | 0.0005 | 6  | 113099084 | OTTHUMG00000015394;RP1-159M24.1  | -160002 |
| rs966169   | 0.0005 | 8  | 40037659  | C8orf4                           | 24838   |
| rs408359   | 0.0005 | 6  | -9        | N/A                              | -9      |
| rs7447588  | 0.0005 | 5  | 154865786 | AC010591.1                       | 77426   |
| rs1926069  | 0.0005 | 20 | 54866110  | RP11-380D15.3;OTTHUMG00000032784 | 4913    |
| rs340297   | 0.0005 | 3  | 158646151 | IQCJ;OTTHUMG00000158841          | -33873  |
| rs6868969  | 0.0005 | 5  | 57063291  | RP11-772C9.1;OTTHUMG00000162327  | -15747  |
| rs10494468 | 0.0005 | 1  | 167071780 | OTTHUMG00000034434;DUSP27        | 0       |
| rs11167730 | 0.0005 | 5  | 154850055 | AC010591.1                       | 61695   |
| rs1728367  | 0.0005 | 16 | 86386888  | AC092327.1                       | -7603   |
| rs3786296  | 0.0005 | 18 | 12005933  | OTTHUMG00000131693;IMPA2         | 0       |
| rs17324527 | 0.0005 | 4  | 183538955 | ODZ3;OTTHUMG00000160682          | 0       |
| rs1361147  | 0.0006 | 6  | 133547481 | EYA4;OTTHUMG00000015602          | -15014  |
| rs2647601  | 0.0006 | 11 | 5376856   | OTTHUMG00000066670;AC104389.28   | 0       |
| rs11732838 | 0.0006 | 4  | 178748145 | RP11-162G9.1;OTTHUMG00000160725  | 0       |
| rs748418   | 0.0006 | 5  | 18714208  | CTD-2023M8.1;OTTHUMG00000161873  | 0       |
| rs10490037 | 0.0006 | 2  | 229741332 | OTTHUMG00000153591;AC007677.1    | 122830  |
| rs11660123 | 0.0006 | 18 | 49905353  | DCC;OTTHUMG00000132698           | 0       |
| rs3843045  | 0.0006 | 20 | 6264593   | AL109618.1                       | -54998  |

|            |        |    |           |                                  |         |
|------------|--------|----|-----------|----------------------------------|---------|
| rs2694392  | 0.0006 | 12 | 105942955 | C12orf75;OTTHUMG00000150129      | 177659  |
| rs2432923  | 0.0006 | 5  | 154865288 | AC010591.1                       | 76928   |
| rs3760606  | 0.0006 | 18 | 59220394  | CDH20;OTTHUMG00000132768         | 0       |
| rs11236507 | 0.0006 | 11 | 75444605  | MOGAT2                           | 1945    |
| rs4349131  | 0.0006 | 16 | 8608537   | TMEM114                          | 11171   |
| rs16841209 | 0.0006 | 4  | 7782434   | OTTHUMG00000125515;AFAP1         | 0       |
| rs2139592  | 0.0006 | 2  | 30974794  | CAPN13;OTTHUMG00000152053        | 0       |
| rs17514713 | 0.0006 | 22 | 29182070  | CCDC117;OTTHUMG00000151091       | 0       |
| rs12768691 | 0.0006 | 10 | 127197908 | RPS27P18;OTTHUMG00000019226      | -35407  |
| rs11044870 | 0.0006 | 12 | 19959822  | AC090059.1                       | 82289   |
| rs6784615  | 0.0006 | 3  | 52506426  | NISCH;OTTHUMG00000158571         | 0       |
| rs13269119 | 0.0006 | 8  | 118123066 | SLC30A8                          | 0       |
| rs515442   | 0.0006 | 13 | 30551248  | RP11-90M5.1;OTTHUMG00000016659   | 26623   |
| rs8006628  | 0.0006 | 14 | 99023266  | C14orf177                        | -154684 |
| rs17324576 | 0.0006 | 4  | 183539039 | ODZ3;OTTHUMG00000160682          | 0       |
| rs7817043  | 0.0006 | 8  | 134170010 | TG                               | 22867   |
| rs7937563  | 0.0006 | 11 | 25793348  | RPL36AP40;OTTHUMG00000158318     | -183007 |
| rs4072368  | 0.0006 | 1  | 62504939  | OTTHUMG00000008560;INADL         | 0       |
| rs9638919  | 0.0006 | 7  | 36159611  | AC078841.5;OTTHUMG00000155059    | -9129   |
| rs4541325  | 0.0006 | 22 | 17782813  | CECR9;OTTHUMG00000150065         | -27111  |
| rs7045097  | 0.0006 | 9  | 6402856   | UHRF2;OTTHUMG00000019521         | -10295  |
| rs938065   | 0.0006 | 2  | 196001319 | AC010983.1;OTTHUMG00000154373    | -110225 |
| rs7022503  | 0.0006 | 9  | 78742354  | PCSK5;OTTHUMG000000020039        | 0       |
| rs1429547  | 0.0006 | 17 | 52598807  | ISCA1P3                          | 43331   |
| rs6539278  | 0.0006 | 12 | 106958864 | RFX4                             | -17821  |
| rs2736553  | 0.0006 | 11 | 5384429   | OTTHUMG00000006670;AC104389.28   | 0       |
| rs1474194  | 0.0007 | 2  | 30974735  | CAPN13;OTTHUMG00000152053        | 0       |
| rs9302868  | 0.0007 | 16 | 8609969   | TMEM114                          | 9739    |
| rs230852   | 0.0007 | 5  | 56960742  | CTD-2023N9.3;OTTHUMG00000162504  | 47484   |
| rs7611509  | 0.0007 | 3  | 144980846 | RP11-622L21.1;OTTHUMG00000159390 | -260479 |
| rs3018921  | 0.0007 | 8  | 107835942 | ABRA                             | -53470  |
| rs6424267  | 0.0007 | 1  | 233171263 | PCNXL2;OTTHUMG000000037824       | 0       |
| rs7177659  | 0.0007 | 15 | 80158042  | MTHFS;OTTHUMG00000144174         | 0       |
| rs6461062  | 0.0007 | 7  | 14101573  | AC004909.3;OTTHUMG00000152410    | 8587    |
| rs17056627 | 0.0007 | 5  | 158659707 | AC134043.2                       | 2377    |
| rs10940570 | 0.0007 | 5  | 56981001  | RP11-772C9.1;OTTHUMG00000162327  | 66018   |
| rs6084189  | 0.0007 | 20 | 2869695   | OTTHUMG000000031718;PTPRA        | 0       |

|            |        |    |           |                                  |         |
|------------|--------|----|-----------|----------------------------------|---------|
| rs9570277  | 0.0007 | 13 | 60808641  | OTTHUMG00000017005;RP11-359P14.1 | -19561  |
| rs17160147 | 0.0007 | 19 | 8148042   | FBN3                             | 0       |
| rs4074769  | 0.0007 | 16 | 8598547   | TMEM114                          | 21161   |
| rs7158844  | 0.0007 | 14 | 99022010  | C14orf177                        | -155940 |
| rs10456882 | 0.0007 | 6  | 113062961 | OTTHUMG00000015394;RP1-159M24.1  | -123879 |
| rs845852   | 0.0007 | 6  | 106146385 | RP3-359N14.1;OTTHUMG00000016419  | 30512   |
| rs6581231  | 0.0007 | 12 | 59511653  | OTTHUMG00000157585;RP11-557F20.1 | 96981   |
| rs954620   | 0.0007 | 6  | 114082753 | AL671966.2                       | 19765   |
| rs2107192  | 0.0007 | 6  | -9        | N/A                              | -9      |
| rs17317237 | 0.0007 | 20 | 53023999  | OTTHUMG00000032778;DOK5          | -68137  |
| rs6415441  | 0.0007 | 8  | 105892704 | RP11-200A13.1;OTTHUMG00000158678 | 100688  |
| rs698028   | 0.0007 | 14 | 62120575  | OTTHUMG00000140344;HIF1A         | -41544  |
| rs11060514 | 0.0007 | 12 | 130210479 | TMEM132D                         | 0       |
| rs7074909  | 0.0007 | 10 | 24841274  | KIAA1217;OTTHUMG00000017824      | 4502    |
| rs7714534  | 0.0007 | 5  | 56982227  | RP11-772C9.1;OTTHUMG00000162327  | 64792   |
| rs4348357  | 0.0007 | 6  | -9        | N/A                              | -9      |
| rs12609513 | 0.0007 | 19 | 15216006  | SYDE1                            | -2208   |
| rs11208743 | 0.0008 | 1  | 66242820  | PDE4B;OTTHUMG00000009088         | -15377  |
| rs978000   | 0.0008 | 5  | 154855951 | AC010591.1                       | 67591   |
| rs336341   | 0.0008 | 4  | 142959830 | INPP4B;OTTHUMG00000161341        | 0       |
| rs336339   | 0.0008 | 4  | 142959964 | INPP4B;OTTHUMG00000161341        | 0       |
| rs336338   | 0.0008 | 4  | 142960059 | INPP4B;OTTHUMG00000161341        | 0       |
| rs2880848  | 0.0008 | 13 | 19314519  | OTTHUMG00000016465;RP11-38M15.6  | 0       |
| rs1078544  | 0.0008 | 17 | 70767809  | SLC39A11                         | 0       |
| rs8004992  | 0.0008 | 14 | 99023182  | C14orf177                        | -154768 |
| rs6549870  | 0.0008 | 3  | 28703364  | AC109586.1;OTTHUMG00000155718    | 0       |
| rs9822377  | 0.0008 | 3  | 74722828  | CNTN3;OTTHUMG00000158813         | -152537 |
| rs17071722 | 0.0008 | 6  | 110794092 | SLC22A16;OTTHUMG00000016171      | 0       |
| rs1491357  | 0.0008 | 4  | 20904528  | OTTHUMG00000128557;KCNIP4        | 0       |
| rs9891949  | 0.0008 | 17 | 8099183   | C17orf59;OTTHUMG00000153930      | -5619   |
| rs4574884  | 0.0008 | 8  | 131367481 | ASAP1                            | 0       |
| rs10517283 | 0.0008 | 4  | 54051213  | OTTHUMG00000160588;SCFD2         | 0       |
| rs2070150  | 0.0008 | 1  | 161761276 | OTTHUMG00000023961;ATF6          | 0       |
| rs1064583  | 0.0008 | 6  | 116446576 | COL10A1;OTTHUMG00000015426       | 0       |
| rs17059034 | 0.0008 | 8  | 28226017  | OTTHUMG00000102137;ZNF395        | 0       |
| rs10493636 | 0.0008 | 1  | 80416512  | RP11-339A11.1;OTTHUMG00000009702 | 141280  |
| rs7528116  | 0.0008 | 1  | 115687266 | RP4-666F24.3;OTTHUMG00000011879  | 41987   |

|            |        |    |           |                                  |         |
|------------|--------|----|-----------|----------------------------------|---------|
| rs6747987  | 0.0008 | 2  | 75815249  | OTTHUMG00000152943;AC005034.2    | -9948   |
| rs17097298 | 0.0008 | 14 | 99027363  | C14orf177                        | -150587 |
| rs199263   | 0.0008 | 3  | 37559645  | OTTHUMG00000130815;ITGA9         | 0       |
| rs2063452  | 0.0008 | 2  | 196012052 | AC010983.1;OTTHUMG00000154373    | -120958 |
| rs9355518  | 0.0008 | 6  | 165367973 | OTTHUMG00000015982;RP11-300M24.1 | 124867  |
| rs2302698  | 0.0008 | 2  | 169963429 | OTTHUMG00000155318;AC007556.3    | 5709    |
| rs530536   | 0.0008 | 22 | 27587222  | CTA-503F6.2;OTTHUMG00000150949   | -12951  |
| rs12040523 | 0.0008 | 1  | 161881297 | OTTHUMG00000023961;ATF6          | 0       |
| rs4945480  | 0.0008 | 6  | 113120853 | AL360015.1                       | -171842 |
| rs7850497  | 0.0008 | 9  | 6395540   | UHRF2;OTTHUMG00000019521         | -17611  |
| rs2107825  | 0.0008 | 7  | 82551266  | PCLO;OTTHUMG00000154853          | 0       |
| rs4297552  | 0.0008 | 12 | 107560781 | CRY1                             | -73183  |
| rs7018326  | 0.0008 | 8  | 125977492 | ZNF572                           | -8047   |
| rs12530870 | 0.0008 | 7  | 36181501  | OTTHUMG00000154904;EEPD1         | -11257  |
| rs2194708  | 0.0008 | 5  | 154859406 | AC010591.1                       | 71046   |
| rs1648250  | 0.0008 | 13 | 103752904 | SLC10A2;OTTHUMG00000017313       | -33708  |
| rs1325200  | 0.0008 | 1  | 80417994  | RP11-339A11.1;OTTHUMG00000009702 | 139798  |
| rs12765878 | 0.0008 | 10 | 105669622 | OBFC1;OTTHUMG00000018996         | 0       |
| rs12512553 | 0.0008 | 4  | 63820090  | RP11-323K3.1;OTTHUMG00000160716  | 135578  |
| rs1647594  | 0.0008 | 5  | 154876047 | AC010591.1                       | 87687   |
| rs2312979  | 0.0008 | 5  | 154866865 | AC010591.1                       | 78505   |
| rs1493657  | 0.0008 | 11 | 25761824  | RPL36AP40;OTTHUMG00000158318     | -151483 |
| rs2791349  | 0.0009 | 8  | 131345906 | ASAP1                            | 0       |
| rs10493589 | 0.0009 | 1  | 76732857  | OTTHUMG00000009615;ST6GALNAC3    | 0       |
| rs7016437  | 0.0009 | 8  | 118060748 | SLC30A8                          | 0       |
| rs6578048  | 0.0009 | 8  | 140870974 | TRAPPC9                          | 0       |
| rs10968574 | 0.0009 | 9  | 28413315  | LINGO2;OTTHUMG00000019721        | 0       |
| rs1940     | 0.0009 | 16 | 57915407  | CNGB1;OTTHUMG00000154810         | 837     |
| rs7949396  | 0.0009 | 11 | 7333468   | SYT9                             | 0       |
| rs17066056 | 0.0009 | 13 | 76887518  | AL445929.1                       | 178172  |
| rs954388   | 0.0009 | 20 | 6175064   | OTTHUMG00000031829;TARDBPL       | 6572    |
| rs1500033  | 0.0009 | 12 | 59520330  | OTTHUMG00000157585;RP11-557F20.1 | 105658  |
| rs1397744  | 0.0009 | 2  | 196045183 | AC010983.1;OTTHUMG00000154373    | -154089 |
| rs11153377 | 0.0009 | 6  | 113039912 | OTTHUMG00000015394;RP1-159M24.1  | -100830 |
| rs17030598 | 0.0009 | 3  | 105365    | OTTHUMG00000154852;AY269186.2    | -9336   |
| rs543134   | 0.0009 | 2  | 30917735  | CAPN13;OTTHUMG00000152053        | 27902   |
| rs10828584 | 0.0009 | 10 | 24278748  | KIAA1217;OTTHUMG00000017824      | 0       |



|            |        |    |           |                                  |         |
|------------|--------|----|-----------|----------------------------------|---------|
| rs6889334  | 0.0009 | 5  | 156311624 | AC011414.2                       | 32085   |
| rs7831209  | 0.0009 | 8  | 27866322  | AC069113.1                       | 0       |
| rs12246970 | 0.0009 | 10 | 424200    | DIP2C;OTTHUMG00000017532         | 0       |
| rs2893525  | 0.0009 | 7  | 36149973  | AC078841.5;OTTHUMG00000155059    | 0       |
| rs230823   | 0.0009 | 5  | 56957896  | CTD-2023N9.3;OTTHUMG00000162504  | 44638   |
| rs41398251 | 0.0009 | 21 | 42480028  | C21orf130;OTTHUMG00000086741     | 33399   |
| rs11167682 | 0.0009 | 5  | 153822342 | AC008625.2                       | 0       |
| rs7100550  | 0.0009 | 10 | 76237498  | OTTHUMG00000018506;ADK           | 0       |
| rs1459952  | 0.0009 | 11 | 81582739  | AP002802.1                       | 8157    |
| rs2861668  | 0.0009 | 3  | 173927196 | OTTHUMG00000157005;NLGN1         | 0       |
| rs7739145  | 0.0009 | 6  | 113140908 | AL360015.1                       | -151787 |
| rs7775421  | 0.0009 | 6  | 119591779 | MAN1A1;OTTHUMG00000015472        | 0       |
| rs17633799 | 0.0009 | 19 | 53185531  | ZNF611;OTTHUMG00000154908        | 21941   |
| rs6581232  | 0.0009 | 12 | 59511889  | OTTHUMG00000157585;RP11-557F20.1 | 97217   |
| rs7952875  | 0.0009 | 12 | 59507893  | OTTHUMG00000157585;RP11-557F20.1 | 93221   |
| rs7984957  | 0.0009 | 13 | 60814970  | OTTHUMG00000017005;RP11-359P14.1 | -25890  |
| rs12562944 | 0.0009 | 1  | 200162670 | NR5A2;OTTHUMG00000035635         | 16118   |
| rs9864661  | 0.0009 | 3  | 144985754 | RP11-622L21.1;OTTHUMG00000159390 | -255571 |
| rs10000659 | 0.0009 | 4  | 93182256  | OTTHUMG00000160917;RP11-562F9.2  | 7662    |
| rs2177745  | 0.0009 | 11 | 112240104 | AP002841.2                       | 6847    |
| rs6598886  | 0.001  | 1  | 27849300  | OTTHUMG00000003517;RP1-159A19.4  | -3016   |
| rs17214837 | 0.001  | 9  | 126369126 | OTTHUMG00000020643;DENND1A       | 0       |
| rs2099106  | 0.001  | 16 | 9380708   | RP11-473I1.1;OTTHUMG00000158086  | -129970 |
| rs11236518 | 0.001  | 11 | 75453066  | MOGAT2                           | 10406   |
| rs2494533  | 0.001  | 6  | 110810491 | SLC22A16;OTTHUMG00000016171      | -12647  |
| rs172531   | 0.001  | 1  | 8495590   | RERE;OTTHUMG00000001765          | 0       |
| rs301801   | 0.001  | 1  | 8495945   | RERE;OTTHUMG00000001765          | 0       |
| rs12104757 | 0.001  | 2  | 236289973 | AC092576.1                       | 54878   |
| rs17296123 | 0.001  | 4  | 138847266 | RP11-8P17.1;OTTHUMG00000161281   | 101310  |
| rs6127152  | 0.001  | 20 | 52872215  | PFDN4;OTTHUMG00000032775         | 27624   |
| rs9508605  | 0.001  | 13 | 30530852  | RP11-90M5.1;OTTHUMG00000016659   | 6227    |
| rs302719   | 0.001  | 1  | 8490320   | RP5-1115A15.1;OTTHUMG00000001772 | 0       |
| rs9477598  | 0.001  | 6  | 18053437  | AL589723.1                       | -180    |
| rs11013316 | 0.001  | 10 | 23489752  | C10orf115;OTTHUMG00000017814     | 2993    |
| rs1355696  | 0.001  | 12 | 17424512  | OTTHUMG00000157496;RP11-74N9.1   | 149121  |
| rs9543521  | 0.001  | 13 | 74654900  | KLF12;OTTHUMG00000017078         | 0       |
| rs210351   | 0.001  | 14 | 54174296  | OTTHUMG00000133700;AL163953.3    | 20320   |

|            |        |    |           |                                   |         |
|------------|--------|----|-----------|-----------------------------------|---------|
| rs2823979  | 0.001  | 21 | 18062669  | AP000473.1                        | -28648  |
| rs17574954 | 0.001  | 1  | 108879960 | RP11-483I13.4;OTTHUMG00000011321  | 0       |
| rs10780017 | 0.001  | 3  | 31967450  | OTTHUMG000000130672;OSBPL10       | 0       |
| rs736627   | 0.001  | 8  | 107100285 | RP11-778D12.1;OTTHUMG000000160423 | -127708 |
| rs4290419  | 0.001  | 14 | 100583491 | EVL                               | 0       |
| rs7609906  | 0.001  | 3  | 68965552  | FAM19A4;OTTHUMG000000158744       | 0       |
| rs1264764  | 0.001  | 10 | 116947148 | OTTHUMG00000019096;ATRNL1         | 0       |
| rs11016664 | 0.001  | 10 | 130884569 | RP11-442O18.1;OTTHUMG00000019257  | -126243 |
| rs9952931  | 0.001  | 18 | 49929464  | DCC;OTTHUMG000000132698           | 0       |
| rs210352   | 0.0011 | 14 | 54173539  | OTTHUMG000000133700;AL163953.3    | 19563   |
| rs7699465  | 0.0011 | 4  | 97942649  | COX7A2P2;OTTHUMG000000160945      | 118377  |
| rs17585069 | 0.0011 | 4  | 185278417 | RP11-290F5.2;OTTHUMG000000160616  | -3287   |
| rs262847   | 0.0011 | 5  | 169168291 | DOCK2                             | 0       |
| rs1978551  | 0.0011 | 8  | 131257795 | ASAP1                             | 0       |
| rs7833651  | 0.0011 | 8  | 134161109 | TG                                | 13966   |
| rs7100920  | 0.0011 | 10 | 105640978 | OBFC1;OTTHUMG00000018996          | 1322    |
| rs3110504  | 0.0011 | 11 | 62174394  | SCGB1A1                           | -12129  |
| rs12213036 | 0.0011 | 6  | 113143519 | AL360015.1                        | -149176 |
| rs12136689 | 0.0011 | 1  | 8601118   | RERE;OTTHUMG00000001765           | 0       |
| rs6445853  | 0.0011 | 3  | 57134115  | IL17RD;OTTHUMG000000150171        | 0       |
| rs1386443  | 0.0011 | 8  | 122358307 | RP11-414D17.1;OTTHUMG000000158692 | 34070   |
| rs7694264  | 0.0011 | 4  | 63820606  | RP11-323K3.1;OTTHUMG000000160716  | 136094  |
| rs11836781 | 0.0011 | 12 | 91817720  | DCN                               | -240914 |
| rs4302748  | 0.0011 | 7  | 36191699  | OTTHUMG000000154904;EEPD1         | -1059   |
| rs10102960 | 0.0011 | 8  | 3210699   | CSMD1                             | 0       |
| rs2642973  | 0.0011 | 1  | 247162658 | OTTHUMG000000040707;ZNF695        | 0       |
| rs6792421  | 0.0011 | 3  | 62185364  | PTPRG;OTTHUMG000000158660         | 0       |
| rs1580840  | 0.0011 | 4  | 142926931 | INPP4B;OTTHUMG000000161341        | 17382   |
| rs17010845 | 0.0011 | 10 | 49791474  | ARHGAP22;OTTHUMG00000018176       | 0       |
| rs4857065  | 0.0012 | 3  | 97477083  | EPHA6;OTTHUMG000000159208         | 5779    |
| rs2717141  | 0.0012 | 18 | 75009619  | OTTHUMG000000132875;GALR1         | 28761   |
| rs6123401  | 0.0012 | 20 | 53256481  | OTTHUMG000000032778;DOK5          | 0       |
| rs7650625  | 0.0012 | 3  | 68964109  | FAM19A4;OTTHUMG000000158744       | 0       |
| rs1495377  | 0.0012 | 12 | 71577101  | TSPAN8                            | 0       |
| rs4854306  | 0.0012 | 2  | 433274    | OTTHUMG000000151358;AC105393.2    | 10971   |
| rs7077246  | 0.0012 | 10 | 127209521 | RPS27P18;OTTHUMG00000019226       | -47020  |
| rs7128180  | 0.0012 | 11 | 25757021  | RPL36AP40;OTTHUMG000000158318     | -146680 |

|            |        |    |           |                                  |         |
|------------|--------|----|-----------|----------------------------------|---------|
| rs11028885 | 0.0012 | 11 | 25757786  | RPL36AP40;OTTHUMG00000158318     | -147445 |
| rs2495051  | 0.0012 | 1  | 14048199  | OTTHUMG00000007917;PRDM2         | 0       |
| rs1954602  | 0.0012 | 1  | 191558022 | OTTHUMG00000041126;RP11-541F9.1  | 269815  |
| rs604788   | 0.0012 | 2  | 33664350  | RASGRP3;OTTHUMG00000152124       | 0       |
| rs12464679 | 0.0012 | 2  | 119767322 | MARCO;OTTHUMG00000131400         | 15086   |
| rs7870771  | 0.0012 | 9  | 31397582  | RP11-291J9.1;OTTHUMG00000019736  | -107696 |
| rs7820941  | 0.0012 | 8  | 129303172 | AC007860.1                       | 70123   |
| rs4491254  | 0.0012 | 11 | 86610247  | FZD4                             | 46475   |
| rs1877834  | 0.0012 | 13 | 61646221  | RP11-196P2.1;OTTHUMG00000017010  | 154082  |
| rs1507316  | 0.0012 | 4  | 63824412  | RP11-323K3.1;OTTHUMG00000160716  | 139900  |
| rs6984815  | 0.0012 | 8  | 131156071 | AC103725.1                       | 0       |
| rs17062398 | 0.0012 | 9  | 78913657  | PCSK5;OTTHUMG00000020039         | 0       |
| rs1078545  | 0.0012 | 17 | 70767984  | SLC39A11                         | 0       |
| rs758895   | 0.0012 | 7  | 150574923 | ABP1;OTTHUMG00000158306          | 16331   |
| rs11253197 | 0.0012 | 10 | 5524401   | CALML5;OTTHUMG00000017598        | 16259   |
| rs8011174  | 0.0012 | 14 | 37498841  | SLC25A21;OTTHUMG00000140250      | 0       |
| rs12028953 | 0.0012 | 1  | 161852353 | OTTHUMG00000023961;ATF6          | 0       |
| rs1004588  | 0.0012 | 3  | 186006618 | OTTHUMG00000156617;DGKG          | 0       |
| rs4320911  | 0.0012 | 10 | 49793554  | ARHGAP22;OTTHUMG00000018176      | 0       |
| rs6539818  | 0.0012 | 12 | 84544531  | AC090679.1                       | 32572   |
| rs2426377  | 0.0012 | 20 | 50314369  | OTTHUMG00000032751;ATP9A         | 0       |
| rs6779183  | 0.0012 | 3  | 144980110 | RP11-622L21.1;OTTHUMG00000159390 | -261215 |
| rs6559181  | 0.0012 | 8  | 720491    | OTTHUMG00000129163;ERICH1        | -39252  |
| rs17821926 | 0.0012 | 10 | 105815116 | OTTHUMG00000018998;COL17A1       | 0       |
| rs2366360  | 0.0012 | 11 | 114698949 | FAM55B                           | 120664  |
| rs6516643  | 0.0012 | 21 | 26222398  | AP000235.2;OTTHUMG00000078331    | 0       |
| rs10257418 | 0.0012 | 7  | 17783427  | SNX13;OTTHUMG00000152730         | 46958   |
| rs12670489 | 0.0012 | 7  | 150572570 | ABP1;OTTHUMG00000158306          | 13978   |
| rs4738861  | 0.0012 | 8  | 61979873  | AC105015.1                       | -135037 |
| rs6983761  | 0.0012 | 8  | 134187053 | WISP1                            | -16259  |
| rs7113960  | 0.0012 | 11 | 97215979  | AP005434.1                       | -312485 |
| rs1676187  | 0.0013 | 4  | 178978140 | AC021200.1                       | 59735   |
| rs6876947  | 0.0013 | 5  | 3228264   | OTTHUMG00000161608;CTD-2029E14.1 | 46918   |
| rs41501046 | 0.0013 | 7  | 14104848  | AC004909.3;OTTHUMG00000152410    | 5312    |
| rs4242952  | 0.0013 | 13 | 73990613  | RP11-30C8.2;OTTHUMG00000017077   | 0       |
| rs2816319  | 0.0013 | 1  | 192532792 | RP5-1011O1.2;OTTHUMG00000041135  | 0       |
| rs10076934 | 0.0013 | 5  | 154968621 | AC010591.1                       | 180261  |

|            |        |    |           |                                  |         |
|------------|--------|----|-----------|----------------------------------|---------|
| rs1408349  | 0.0013 | 10 | 85419023  | OTTHUMG00000018629;RP11-344L13.2 | 13139   |
| rs17565042 | 0.0013 | 16 | 8225750   | AC093515.1                       | -276317 |
| rs3016003  | 0.0013 | 3  | 37587444  | OTTHUMG00000130815;ITGA9         | 0       |
| rs9992023  | 0.0013 | 4  | 25720224  | OTTHUMG00000160336;RP11-302F12.8 | 0       |
| rs4422395  | 0.0013 | 4  | 74741983  | CXCL1;OTTHUMG00000160866         | 5024    |
| rs3860919  | 0.0013 | 9  | 86044538  | FRMD3;OTTHUMG00000020103         | 0       |
| rs7126987  | 0.0013 | 11 | 25771209  | RPL36AP40;OTTHUMG00000158318     | -160868 |
| rs11233357 | 0.0013 | 11 | 82581031  | PRCP                             | 0       |
| rs11215223 | 0.0013 | 11 | 114702663 | FAM55B                           | 124378  |
| rs11219311 | 0.0013 | 11 | 123696261 | OR6M1                            | -19204  |
| rs7299358  | 0.0013 | 12 | 115535403 | AC026765.2                       | 329640  |
| rs1890232  | 0.0013 | 1  | 191564481 | OTTHUMG00000041126;RP11-541F9.1  | 263356  |
| rs16841428 | 0.0013 | 2  | 158117405 | GALNT5;OTTHUMG00000131965        | 0       |
| rs1922876  | 0.0013 | 4  | 161130933 | RP11-502M1.1;OTTHUMG00000161423  | 312048  |
| rs8003616  | 0.0013 | 14 | 52646094  | OTTHUMG00000140299;PTGDR         | -88337  |
| rs1549392  | 0.0013 | 7  | 23956720  | AC009508.1;OTTHUMG00000152555    | -19766  |
| rs2702969  | 0.0013 | 8  | 134067532 | SLA                              | 0       |
| rs1664278  | 0.0013 | 10 | 61694304  | C10orf40;OTTHUMG00000018285      | 23671   |
| rs1203630  | 0.0013 | 1  | 14067851  | OTTHUMG00000007917;PRDM2         | 0       |
| rs3820423  | 0.0013 | 1  | 201061777 | CACNA1S;OTTHUMG00000035784       | 0       |
| rs10168064 | 0.0013 | 2  | 67008311  | AC009474.1;OTTHUMG00000152855    | 39505   |
| rs2343849  | 0.0013 | 3  | 32446152  | OTTHUMG00000155869;CMTM7         | 0       |
| rs12637414 | 0.0013 | 3  | 97606672  | CRYBG3;OTTHUMG00000159187        | 0       |
| rs6873648  | 0.0013 | 5  | 154969053 | AC010591.1                       | 180693  |
| rs7327426  | 0.0013 | 13 | 61612740  | RP11-196P2.1;OTTHUMG00000017010  | 120601  |
| rs17536192 | 0.0013 | 14 | 33535924  | OTTHUMG00000140215;NPAS3         | 0       |
| rs16966896 | 0.0013 | 16 | 64069918  | AC093536.1                       | 224552  |
| rs9637208  | 0.0013 | 21 | 47284892  | PCBP3;OTTHUMG00000090399         | 0       |
| rs12093398 | 0.0013 | 1  | 246113980 | SMYD3;OTTHUMG00000040508         | 0       |
| rs4574573  | 0.0013 | 5  | 37915720  | CTD-2194L12.2;OTTHUMG00000162107 | 0       |
| rs6917857  | 0.0013 | 6  | 165358162 | OTTHUMG00000015982;RP11-300M24.1 | 115056  |
| rs10973666 | 0.0013 | 9  | 38104144  | SHB;OTTHUMG00000019936           | -34934  |
| rs2421360  | 0.0013 | 2  | 125767222 | AC098853.1                       | 20320   |
| rs10211241 | 0.0013 | 2  | 200567136 | AC093590.2;OTTHUMG00000154492    | 41684   |
| rs1448346  | 0.0013 | 7  | 114421923 | OTTHUMG00000023131;FOXP2         | 88096   |
| rs1684906  | 0.0013 | 10 | 61693975  | C10orf40;OTTHUMG00000018285      | 24000   |
| rs11088210 | 0.0013 | 21 | 33561604  | OTTHUMG00000085307;NCRNA00159    | 0       |

|            |        |    |           |                                   |         |
|------------|--------|----|-----------|-----------------------------------|---------|
| rs2498982  | 0.0013 | 1  | 62516683  | OTTHUMG00000008560;INADL          | 0       |
| rs11785559 | 0.0013 | 8  | 129300304 | AC007860.1                        | 67255   |
| rs7147924  | 0.0013 | 14 | 52610520  | OTTHUMG000000140298;NID2          | -73975  |
| rs3901896  | 0.0013 | 15 | 80734097  | AC016705.1                        | 0       |
| rs10500328 | 0.0013 | 16 | 5807878   | AC012175.1                        | 2810    |
| rs9992790  | 0.0014 | 4  | 61371097  | AC095061.1                        | 158570  |
| rs2667132  | 0.0014 | 4  | 142927755 | INPP4B;OTTHUMG000000161341        | 16558   |
| rs6932080  | 0.0014 | 6  | 78708695  | AL050340.1                        | 61707   |
| rs1664276  | 0.0014 | 10 | 61693239  | C10orf40;OTTHUMG00000018285       | 24736   |
| rs6585151  | 0.0014 | 10 | 114110814 | GUCY2GP;OTTHUMG00000019058;GUC    | 0       |
| rs10793124 | 0.0014 | 11 | 75452267  | MOGAT2                            | 9607    |
| rs1793173  | 0.0014 | 11 | 118074117 | AMICA1                            | 0       |
| rs9592091  | 0.0014 | 13 | 61676435  | RP11-196P2.1;OTTHUMG00000017010   | 184296  |
| rs7546225  | 0.0014 | 1  | 8871965   | RERE;OTTHUMG00000001765           | 0       |
| rs6868240  | 0.0014 | 5  | 4938915   | AC114303.1                        | -8792   |
| rs12527030 | 0.0014 | 6  | 165274670 | OTTHUMG00000015982;RP11-300M24.1  | 31564   |
| rs2799729  | 0.0014 | 9  | 38466031  | RP11-403F21.1;OTTHUMG00000019940  | -11964  |
| rs979713   | 0.0014 | 17 | 11599687  | DNAH9;OTTHUMG000000130383         | 0       |
| rs2018572  | 0.0014 | 17 | 11599798  | DNAH9;OTTHUMG000000130383         | 0       |
| rs5749016  | 0.0014 | 22 | 17783945  | CECR9;OTTHUMG000000150065         | -25979  |
| rs2291842  | 0.0014 | 11 | 5719667   | OTTHUMG000000066904;TRIM22        | 0       |
| rs1559669  | 0.0014 | 11 | 107084715 | CWF19L2;OTTHUMG000000152975       | 112359  |
| rs11082922 | 0.0014 | 18 | 49929447  | DCC;OTTHUMG000000132698           | 0       |
| rs8131179  | 0.0014 | 21 | 44082201  | PDE9A;OTTHUMG000000086825         | 0       |
| rs10125018 | 0.0014 | 9  | 31394698  | RP11-291J9.1;OTTHUMG00000019736   | -110580 |
| rs7946787  | 0.0014 | 11 | 107140547 | CWF19L2;OTTHUMG000000152975       | 56527   |
| rs3852946  | 0.0014 | 20 | 6255311   | AL109618.1                        | -45716  |
| rs6427830  | 0.0014 | 1  | 200464803 | OTTHUMG000000035719;RP11-469A15.2 | 17382   |
| rs11708232 | 0.0014 | 3  | 26423469  | AC098615.2;OTTHUMG000000155613    | -34340  |
| rs7788676  | 0.0014 | 7  | 14061054  | AC004909.1                        | -10666  |
| rs10834774 | 0.0014 | 11 | 25758821  | RPL36AP40;OTTHUMG000000158318     | -148480 |
| rs783230   | 0.0014 | 17 | 72541980  | CD300C;OTTHUMG000000067608        | 0       |
| rs778187   | 0.0014 | 2  | 137595545 | THSD7B;OTTHUMG000000153590        | 0       |
| rs981544   | 0.0014 | 4  | 97931374  | COX7A2P2;OTTHUMG000000160945      | 107102  |
| rs2741205  | 0.0014 | 8  | 134076725 | SLA                               | 0       |
| rs11038423 | 0.0014 | 11 | 45399819  | SYT13                             | -91935  |
| rs7324102  | 0.0014 | 13 | 39867151  | LHFP;OTTHUMG00000016767           | 49878   |

|            |        |    |           |                                  |         |
|------------|--------|----|-----------|----------------------------------|---------|
| rs11711363 | 0.0014 | 3  | 140727    | OTTHUMG00000154852;AY269186.2    | -44698  |
| rs17071719 | 0.0014 | 6  | 110793870 | SLC22A16;OTTHUMG00000016171      | 0       |
| rs7318329  | 0.0014 | 13 | 61686544  | RP11-196P2.1;OTTHUMG00000017010  | 194405  |
| rs2710673  | 0.0014 | 2  | 17845296  | SMC6;OTTHUMG00000090675          | 0       |
| rs17009486 | 0.0014 | 2  | 30660266  | AC073255.2                       | -4952   |
| rs544395   | 0.0014 | 2  | 30919788  | CAPN13;OTTHUMG00000152053        | 25849   |
| rs17258738 | 0.0014 | 4  | 183539691 | ODZ3;OTTHUMG00000160682          | 0       |
| rs10463368 | 0.0014 | 5  | 143569586 | KCTD16;OTTHUMG00000163172        | 0       |
| rs6461065  | 0.0014 | 7  | 14105880  | AC004909.3;OTTHUMG00000152410    | 4280    |
| rs11224402 | 0.0014 | 11 | 100579713 | ARHGAP42                         | 0       |
| rs17403138 | 0.0014 | 1  | 165177170 | LMX1A;OTTHUMG00000034575         | 0       |
| rs6898205  | 0.0014 | 5  | 154969953 | AC010591.1                       | 181593  |
| rs12205260 | 0.0014 | 6  | 119635739 | MAN1A1;OTTHUMG00000015472        | 0       |
| rs17709973 | 0.0014 | 10 | 20670574  | RP11-337N19.1;OTTHUMG00000017782 | 30545   |
| rs12281442 | 0.0014 | 11 | 25777091  | RPL36AP40;OTTHUMG00000158318     | -166750 |
| rs6054049  | 0.0014 | 20 | 6254909   | AL109618.1                       | -45314  |
| rs778188   | 0.0015 | 2  | 137594925 | THSD7B;OTTHUMG00000153590        | 0       |
| rs1559165  | 0.0015 | 5  | 154973131 | AC010591.1                       | 184771  |
| rs10959672 | 0.0015 | 9  | 11257448  | RP11-23D5.1;OTTHUMG00000019554   | 17866   |
| rs7855520  | 0.0015 | 9  | 31381316  | RP11-291J9.1;OTTHUMG00000019736  | -123962 |
| rs1877535  | 0.0015 | 12 | 17425575  | OTTHUMG00000157496;RP11-74N9.1   | 150184  |
| rs990284   | 0.0015 | 3  | 104972    | OTTHUMG00000154852;AY269186.2    | -8943   |
| rs155524   | 0.0015 | 3  | 37562141  | OTTHUMG00000130815;ITGA9         | 0       |
| rs2073149  | 0.0015 | 6  | -9        | N/A                              | -9      |
| rs12206418 | 0.0015 | 6  | 78699746  | AL050340.1                       | 52758   |
| rs12541216 | 0.0015 | 8  | 74875358  | TCEB1                            | 0       |
| rs7862494  | 0.0015 | 9  | 38459763  | RP11-403F21.1;OTTHUMG00000019940 | -5696   |
| rs11028909 | 0.0015 | 11 | 25772445  | RPL36AP40;OTTHUMG00000158318     | -162104 |
| rs1974236  | 0.0015 | 13 | 21809058  | RP11-101P17.10;OTTHUMG0000001653 | 0       |
| rs724051   | 0.0015 | 16 | 64068732  | AC093536.1                       | 225738  |
| rs2277998  | 0.0015 | 19 | 7831628   | CLEC4M                           | 0       |
| rs11153383 | 0.0015 | 6  | 113125985 | AL360015.1                       | -166710 |
| rs10793125 | 0.0015 | 11 | 75452364  | MOGAT2                           | 9704    |
| rs6516641  | 0.0015 | 21 | 26221082  | AP000235.2;OTTHUMG00000078331    | 0       |
| rs6928046  | 0.0015 | 6  | 113129993 | AL360015.1                       | -162702 |
| rs6936790  | 0.0015 | 6  | 119707418 | MAN1A1;OTTHUMG00000015472        | -36492  |
| rs10773707 | 0.0015 | 12 | 130263311 | TMEM132D                         | 0       |

|            |        |    |           |                                  |         |
|------------|--------|----|-----------|----------------------------------|---------|
| rs3864171  | 0.0015 | 4  | 173895238 | OTTHUMG00000160807;GALNTL6       | 0       |
| rs1429675  | 0.0015 | 8  | 107101623 | RP11-778D12.1;OTTHUMG00000160423 | -126370 |
| rs11236531 | 0.0015 | 11 | 75493209  | DGAT2                            | 0       |
| rs7107742  | 0.0015 | 11 | 75557410  | UVRAG                            | 0       |
| rs13326685 | 0.0015 | 3  | 189560617 | TP63;OTTHUMG00000156313          | 0       |
| rs1376417  | 0.0015 | 4  | 66234569  | EPHA5;OTTHUMG00000129273         | 0       |
| rs17728052 | 0.0015 | 6  | 78930181  | AL050340.1                       | 283193  |
| rs11038430 | 0.0015 | 11 | 45406740  | SYT13                            | -98856  |
| rs1326711  | 0.0015 | 13 | 75090802  | OTTHUMG00000017082;RP11-285E18.1 | -36178  |
| rs1321464  | 0.0015 | 20 | 53032257  | OTTHUMG00000032778;DOK5          | -59879  |
| rs4668897  | 0.0015 | 2  | 15480441  | OTTHUMG00000121153;NBAS          | 0       |
| rs8177201  | 0.0015 | 3  | 133469855 | OTTHUMG00000150356;TF            | 0       |
| rs6825703  | 0.0015 | 4  | 174210358 | GALNT7;OTTHUMG00000160817        | 0       |
| rs13359971 | 0.0015 | 5  | 124241613 | RP11-284A20.1;OTTHUMG00000162992 | -14027  |
| rs6455975  | 0.0015 | 6  | 165359087 | OTTHUMG00000015982;RP11-300M24.1 | 115981  |
| rs11985060 | 0.0015 | 8  | 81522209  | AC022598.1                       | 3564    |
| rs10099580 | 0.0015 | 8  | 122366903 | RP11-414D17.1;OTTHUMG00000158692 | 25474   |
| rs7386870  | 0.0015 | 8  | 131430133 | ASAP1                            | -15916  |
| rs1793174  | 0.0015 | 11 | 118074337 | AMICA1                           | 0       |
| rs1986179  | 0.0015 | 16 | 61027184  | RP11-51O6.1;OTTHUMG00000158168   | 62165   |
| rs6844834  | 0.0015 | 4  | 10710929  | OTTHUMG00000160063;RP11-61G19.1  | 11644   |
| rs17074473 | 0.0015 | 6  | 113140879 | AL360015.1                       | -151816 |
| rs4527915  | 0.0015 | 8  | 65963602  | RP11-822K17.1;OTTHUMG00000158619 | -104040 |
| rs7858414  | 0.0015 | 9  | 31394336  | RP11-291J9.1;OTTHUMG00000019736  | -110942 |
| rs10512054 | 0.0015 | 9  | 78742697  | PCSK5;OTTHUMG00000020039         | 0       |
| rs12279327 | 0.0015 | 11 | 114694273 | FAM55B                           | 115988  |
| rs951062   | 0.0015 | 12 | 19988377  | AC090059.1                       | 110844  |
| rs7339191  | 0.0015 | 13 | 61629964  | RP11-196P2.1;OTTHUMG00000017010  | 137825  |
| rs1559605  | 0.0015 | 2  | 67066797  | AC009474.1;OTTHUMG00000152855    | -17095  |
| rs744873   | 0.0015 | 2  | 233280565 | AC068134.5;OTTHUMG00000153336    | 0       |
| rs744874   | 0.0015 | 2  | 233280822 | AC068134.5;OTTHUMG00000153336    | 0       |
| rs7647288  | 0.0015 | 3  | 149414331 | WWTR1;OTTHUMG00000159614         | 0       |
| rs12660680 | 0.0015 | 6  | 65292039  | EYS;OTTHUMG00000014971           | 10985   |
| rs10455344 | 0.0015 | 6  | 78942566  | AL050340.1                       | 295578  |
| rs2215562  | 0.0015 | 7  | 150570129 | ABP1;OTTHUMG00000158306          | 11537   |
| rs2673797  | 0.0015 | 10 | 69915035  | MYPN;OTTHUMG00000018344          | 0       |
| rs9596933  | 0.0015 | 13 | 33767700  | RP11-81F11.3;OTTHUMG00000016709  | 0       |

|            |        |    |           |                                   |         |
|------------|--------|----|-----------|-----------------------------------|---------|
| rs262836   | 0.0016 | 5  | 169173581 | DOCK2                             | 0       |
| rs7945912  | 0.0016 | 11 | 750849    | OTTHUMG00000133318;TALDO1         | 0       |
| rs16914560 | 0.0016 | 11 | 25773574  | RPL36AP40;OTTHUMG00000158318      | -163233 |
| rs1836872  | 0.0016 | 16 | 64063724  | AC093536.1                        | 230746  |
| rs202858   | 0.0016 | 21 | 18610044  | AP000457.1;OTTHUMG00000074393     | -26379  |
| rs16841430 | 0.0016 | 2  | 158118624 | GALNT5;OTTHUMG00000131965         | 0       |
| rs10011243 | 0.0016 | 4  | 185346090 | IRF2;OTTHUMG00000160606           | 0       |
| rs10503671 | 0.0016 | 8  | 19987173  | SLC18A1;OTTHUMG00000097017        | 15193   |
| rs2256476  | 0.0016 | 8  | 134107136 | SLA                               | 0       |
| rs719724   | 0.0016 | 9  | 6365614   | OTTHUMG00000019518;TPD52L3        | 33714   |
| rs1214001  | 0.0016 | 11 | 85379511  | OTTHUMG00000133648;CREBZF         | -3365   |
| rs17567007 | 0.0016 | 15 | 28201539  | OTTHUMG00000128871;OCA2           | 0       |
| rs12334756 | 0.0016 | 8  | 105943295 | RP11-200A13.1;OTTHUMG00000158678  | 50097   |
| rs10762618 | 0.0016 | 10 | 76208811  | OTTHUMG00000018506;ADK            | 0       |
| rs2035654  | 0.0016 | 3  | 57140108  | IL17RD;OTTHUMG00000150171         | 0       |
| rs6445991  | 0.0016 | 3  | 58575110  | OTTHUMG00000159159;FAM107A        | 0       |
| rs11740229 | 0.0016 | 5  | 163133019 | AC116917.2                        | 3192    |
| rs1331809  | 0.0016 | 6  | 78797141  | AL050340.1                        | 150153  |
| rs17828750 | 0.0016 | 4  | 63314242  | OTTHUMG00000160669;RP11-26C10.1   | 40974   |
| rs12915979 | 0.0016 | 15 | 91199025  | AC021422.1                        | -4440   |
| rs1433275  | 0.0016 | 10 | 127212655 | RPS27P18;OTTHUMG00000019226       | -50154  |
| rs7112727  | 0.0016 | 11 | 25771252  | RPL36AP40;OTTHUMG00000158318      | -160911 |
| rs16863838 | 0.0016 | 1  | 161735118 | RP11-474I16.8;OTTHUMG00000034539  | 0       |
| rs1408350  | 0.0016 | 10 | 85419147  | OTTHUMG00000018629;RP11-344L13.2  | 13015   |
| rs1742649  | 0.0016 | 14 | 46557134  | N/A                               | -9      |
| rs11632180 | 0.0016 | 15 | 22908279  | OTTHUMG00000129100;CYFIP1         | 0       |
| rs17783087 | 0.0016 | 16 | 83910506  | AC009063.1                        | 0       |
| rs1546157  | 0.0016 | 10 | 84592960  | NRG3;OTTHUMG00000018626           | 0       |
| rs17416166 | 0.0016 | 1  | 55966832  | AL109742.1                        | -16187  |
| rs4951089  | 0.0016 | 1  | 204610898 | OTTHUMG00000035989;LRRN2          | 0       |
| rs7695513  | 0.0016 | 4  | 13490658  | OTTHUMG00000090543;RAB28          | -4669   |
| rs10834785 | 0.0016 | 11 | 25772371  | RPL36AP40;OTTHUMG00000158318      | -162030 |
| rs7149428  | 0.0016 | 14 | 48416201  | MDGA2;OTTHUMG00000029429          | -272248 |
| rs6103592  | 0.0016 | 20 | 42691387  | C20orf100;TOX2;OTTHUMG00000032517 | 0       |
| rs4508611  | 0.0017 | 2  | 161459908 | RBMS1;OTTHUMG00000132031          | -109603 |
| rs16866742 | 0.0017 | 2  | 180330897 | ZNF385B;OTTHUMG00000154559        | 0       |
| rs2018568  | 0.0017 | 17 | 11599819  | DNAH9;OTTHUMG00000130383          | 0       |



|            |        |    |           |                                  |        |
|------------|--------|----|-----------|----------------------------------|--------|
| rs1499663  | 0.0017 | 1  | 56057990  | OTTHUMG00000008246;RP11-466L17.1 | 0      |
| rs684009   | 0.0017 | 2  | 80224923  | CTNNA2;OTTHUMG00000152903        | 0      |
| rs2017907  | 0.0017 | 11 | 107073497 | CWF19L2;OTTHUMG00000152975       | 123577 |
| rs6588498  | 0.0017 | 1  | 48231984  | OTTHUMG00000007960;RP11-543D5.3  | 0      |
| rs2739169  | 0.0017 | 8  | 134095916 | SLA                              | 0      |
| rs10974490 | 0.0017 | 9  | 445286    | DOCK8;OTTHUMG00000078789         | 0      |
| rs292292   | 0.0017 | 18 | 5108877   | AP005380.2                       | 23904  |
| rs2426607  | 0.0017 | 20 | 54872931  | RP11-380D15.3;OTTHUMG00000032784 | 0      |
| rs11140800 | 0.0017 | 9  | 87508137  | OTTHUMG00000020120;NTRK2         | 0      |
| rs9857814  | 0.0017 | 3  | 152047    | OTTHUMG00000154852;AY269186.2    | -56018 |
| rs1021348  | 0.0017 | 5  | 173932224 | RP11-267A15.1;OTTHUMG00000163128 | 0      |
| rs11011346 | 0.0017 | 10 | 38009483  | OTTHUMG00000017976;RP11-258F22.1 | 54816  |
| rs17010841 | 0.0017 | 10 | 49790550  | ARHGAP22;OTTHUMG00000018176      | 0      |
| rs1695105  | 0.0017 | 12 | 64597579  | C12orf66                         | 0      |
| rs11633819 | 0.0017 | 15 | 63180826  | TLN2;OTTHUMG00000133679          | 43996  |
| rs11919702 | 0.0017 | 3  | 148555225 | CPB1;OTTHUMG00000159520          | 0      |
| rs243988   | 0.0017 | 4  | 111267671 | ENPEP;OTTHUMG00000132546         | -19218 |
| rs3129900  | 0.0017 | 6  | -9        | N/A                              | -9     |
| rs4744780  | 0.0017 | 9  | 78723048  | PCSK5;OTTHUMG00000020039         | 0      |
| rs10500464 | 0.0017 | 16 | 62336454  | AC009161.1;OTTHUMG00000128479    | -54821 |
| rs16941875 | 0.0017 | 16 | 86728016  | OTTHUMG00000137653;FOXL1         | 112713 |
| rs9875551  | 0.0017 | 3  | 112579389 | OTTHUMG00000159283;CD200R1L      | -13686 |
| rs17026596 | 0.0017 | 4  | 98197483  | C4orf37;OTTHUMG00000131009       | 0      |
| rs2667120  | 0.0017 | 4  | 142943485 | INPP4B;OTTHUMG00000161341        | 828    |
| rs9257834  | 0.0017 | 6  | -9        | N/A                              | -9     |
| rs1904058  | 0.0017 | 10 | 76197369  | OTTHUMG00000018506;ADK           | 0      |
| rs4930030  | 0.0017 | 11 | 2087220   | AC123789.1                       | 61010  |
| rs1461805  | 0.0017 | 3  | 28700022  | AC109586.1;OTTHUMG00000155718    | 0      |
| rs1022072  | 0.0017 | 4  | 138822785 | OTTHUMG00000161345;RP11-793B23.1 | 85229  |
| rs168074   | 0.0017 | 4  | 142907076 | INPP4B;OTTHUMG00000161341        | 37237  |
| rs337235   | 0.0017 | 4  | 142917986 | INPP4B;OTTHUMG00000161341        | 26327  |
| rs7817885  | 0.0017 | 8  | 115240756 | AC046174.1                       | 277529 |
| rs11648878 | 0.0017 | 16 | 61024961  | RP11-51O6.1;OTTHUMG00000158168   | 64388  |
| rs43497    | 0.0017 | 5  | 96485900  | CTD-2215E18.1;OTTHUMG00000162866 | 0      |
| rs10485001 | 0.0017 | 6  | 119633625 | MAN1A1;OTTHUMG00000015472        | 0      |
| rs2883999  | 0.0017 | 7  | 12697797  | OTTHUMG00000152386;AC011891.5    | 3187   |
| rs10792879 | 0.0017 | 11 | 86612869  | FZD4                             | 43853  |

|            |        |    |           |                                   |         |
|------------|--------|----|-----------|-----------------------------------|---------|
| rs5764558  | 0.0017 | 22 | 44544028  | OTTHUMG000000150665;PARVB         | 0       |
| rs10796293 | 0.0018 | 10 | 15523337  | OTTHUMG000000017733;ITGA8         | 32611   |
| rs2120528  | 0.0018 | 12 | 59511012  | OTTHUMG000000157585;RP11-557F20.1 | 96340   |
| rs6875370  | 0.0018 | 5  | 124244591 | RP11-284A20.1;OTTHUMG000000162992 | -11049  |
| rs13266865 | 0.0018 | 8  | 118038602 | SLC30A8                           | 0       |
| rs11038403 | 0.0018 | 11 | 45359713  | SYT13                             | -51829  |
| rs336352   | 0.0018 | 4  | 142954671 | INPP4B;OTTHUMG000000161341        | 0       |
| rs16881524 | 0.0018 | 5  | 52885883  | NDUFS4;OTTHUMG000000096987        | 0       |
| rs10795621 | 0.0018 | 10 | 8443306   | RP11-543F8.2;OTTHUMG000000017648  | 0       |
| rs6023156  | 0.0018 | 20 | 52979515  | OTTHUMG000000032778;DOK5          | -112621 |
| rs1827286  | 0.0018 | 4  | 142928153 | INPP4B;OTTHUMG000000161341        | 16160   |
| rs4236071  | 0.0018 | 6  | 40750039  | OTTHUMG000000014664;RP11-570K4.1  | -66937  |
| rs11736202 | 0.0018 | 4  | 142944080 | INPP4B;OTTHUMG000000161341        | 233     |
| rs2074681  | 0.0018 | 7  | 70886308  | OTTHUMG000000129783;WBSCR17       | 0       |
| rs3789899  | 0.0018 | 9  | 93615210  | SYK;OTTHUMG000000020200           | 0       |
| rs10899118 | 0.0018 | 11 | 75481664  | DGAT2                             | 0       |
| rs3771395  | 0.0018 | 2  | 71133014  | VAX2;OTTHUMG000000129714          | 0       |
| rs749752   | 0.0018 | 4  | 182754966 | AC093669.1                        | 1052    |
| rs2194249  | 0.0018 | 5  | 53879281  | OTTHUMG000000096994;SNX18         | 36866   |
| rs1052443  | 0.0018 | 6  | 116568773 | NT5DC1;OTTHUMG000000015428        | 1918    |
| rs10895599 | 0.0018 | 11 | 97216147  | AP005434.1                        | -312317 |
| rs8011197  | 0.0018 | 14 | 49655841  | AL358338.1                        | -245124 |
| rs12043295 | 0.0018 | 1  | 157361577 | OTTHUMG000000017483;RP11-85G21.2  | -103734 |
| rs2128347  | 0.0018 | 12 | 84523288  | AC090679.1                        | 53815   |
| rs4233641  | 0.0018 | 2  | 161464213 | RBMS1;OTTHUMG000000132031         | -113908 |
| rs2908337  | 0.0018 | 7  | 15207942  | TMEM195;OTTHUMG000000152387       | 32001   |
| rs7642925  | 0.0018 | 3  | 68964222  | FAM19A4;OTTHUMG000000158744       | 0       |
| rs7686524  | 0.0018 | 4  | 190427447 | AC020698.1                        | 684     |
| rs11837592 | 0.0018 | 12 | 115522837 | AC026765.2                        | 317074  |
| rs167467   | 0.0019 | 3  | 12281183  | AC090947.1                        | 0       |
| rs4312936  | 0.0019 | 5  | 154929106 | AC010591.1                        | 140746  |
| rs2073154  | 0.0019 | 6  | -9        | N/A                               | -9      |
| rs944579   | 0.0019 | 6  | 78772661  | AL050340.1                        | 125673  |
| rs12990505 | 0.0019 | 2  | 196052944 | AC010983.1;OTTHUMG000000154373    | -161850 |
| rs11241798 | 0.0019 | 5  | 124591842 | OTTHUMG000000163013;RP11-425E13.2 | -9379   |
| rs2704956  | 0.0019 | 7  | 105972007 | RP11-22N19.1;OTTHUMG000000157589  | 15818   |
| rs5020509  | 0.0019 | 14 | 52641472  | OTTHUMG000000140299;PTGDR         | -92959  |

|            |        |    |           |                                  |         |
|------------|--------|----|-----------|----------------------------------|---------|
| rs9911583  | 0.0019 | 17 | 57210721  | SKA2                             | 0       |
| rs4409915  | 0.0019 | 12 | 4350991   | CCND2                            | -31911  |
| rs11057637 | 0.0019 | 12 | 124975312 | OTTHUMG00000150455;NCOR2         | 0       |
| rs11852018 | 0.0019 | 14 | 26587737  | AL049831.1                       | 53635   |
| rs12478234 | 0.0019 | 2  | 180334969 | ZNF385B;OTTHUMG00000154559       | 0       |
| rs9362321  | 0.0019 | 6  | 87136247  | RP11-15J23.1;OTTHUMG00000015151  | -5715   |
| rs4098805  | 0.0019 | 10 | 54586048  | AL365506.1                       | -26319  |
| rs11724160 | 0.0019 | 4  | 63823703  | RP11-323K3.1;OTTHUMG00000160716  | 139191  |
| rs10006108 | 0.0019 | 4  | 97924013  | COX7A2P2;OTTHUMG00000160945      | 99741   |
| rs13205628 | 0.0019 | 6  | 78929891  | AL050340.1                       | 282903  |
| rs11899448 | 0.0019 | 2  | 127648946 | OTTHUMG00000153376;AC114783.1    | -7526   |
| rs543864   | 0.0019 | 8  | 36995907  | OTTHUMG00000158604;AC090453.1    | -149973 |
| rs2426606  | 0.0019 | 20 | 54872859  | RP11-380D15.3;OTTHUMG00000032784 | 0       |
| rs4733298  | 0.0019 | 8  | 32008766  | AC022850.2                       | 40778   |
| rs11675369 | 0.0019 | 2  | 75804641  | FAM176A;OTTHUMG00000129991       | -7793   |
| rs2106303  | 0.0019 | 7  | 105970988 | RP11-22N19.1;OTTHUMG00000157589  | 14799   |
| rs8050739  | 0.0019 | 16 | 52664797  | AC026462.1                       | -23950  |
| rs4378909  | 0.0019 | 22 | 47292353  | OTTHUMG00000150332;TBC1D22A      | 0       |
| rs10797603 | 0.0019 | 1  | 233282553 | PCNXL2;OTTHUMG00000037824        | 0       |
| rs9428641  | 0.0019 | 1  | 245500020 | KIF26B;OTTHUMG00000040079        | 0       |
| rs6864542  | 0.0019 | 5  | 99581524  | AC092278.1                       | 92041   |
| rs3129932  | 0.0019 | 6  | -9        | N/A                              | -9      |
| rs567488   | 0.0019 | 11 | 69318518  | CCND1                            | -137355 |
| rs2435389  | 0.0019 | 2  | 137586694 | THSD7B;OTTHUMG00000153590        | 0       |
| rs7783100  | 0.0019 | 7  | 15226640  | TMEM195;OTTHUMG00000152387       | 13303   |
| rs11598126 | 0.0019 | 10 | 15493251  | OTTHUMG00000017733;ITGA8         | 62697   |
| rs10752379 | 0.0019 | 10 | 15523377  | OTTHUMG00000017733;ITGA8         | 32571   |
| rs2021349  | 0.0019 | 20 | 6181948   | OTTHUMG00000031829;TARDBPL       | 0       |
| rs17184565 | 0.002  | 3  | 173937157 | OTTHUMG00000157005;NLGN1         | 0       |
| rs1376764  | 0.002  | 8  | 63412277  | NKAIN3                           | -79821  |
| rs4656334  | 0.002  | 1  | 161778694 | OTTHUMG00000023961;ATF6          | 0       |
| rs7142232  | 0.002  | 14 | 50847492  | CDKL1;OTTHUMG00000140290         | 0       |
| rs1158460  | 0.002  | 16 | 63573118  | CTD-2503H21.1;OTTHUMG00000158177 | -188065 |
| rs11100741 | 0.002  | 4  | 142947546 | INPP4B;OTTHUMG00000161341        | 0       |
| rs17801257 | 0.002  | 20 | 58892520  | RP5-1043L13.1;OTTHUMG00000032883 | 0       |
| rs941032   | 0.002  | 1  | 75622616  | LHX8;OTTHUMG00000009692          | 0       |
| rs1981315  | 0.002  | 9  | 38459529  | RP11-403F21.1;OTTHUMG00000019940 | -5462   |

|            |        |    |           |                                  |         |
|------------|--------|----|-----------|----------------------------------|---------|
| rs12917899 | 0.002  | 16 | 7144123   | RP11-545E8.1;OTTHUMG00000158084  | 32171   |
| rs13329951 | 0.002  | 16 | 63570250  | CTD-2503H21.1;OTTHUMG00000158177 | -185197 |
| rs12629656 | 0.002  | 3  | 83952144  | OTTHUMG00000158955;SRRM1P2       | -34052  |
| rs162116   | 0.002  | 19 | 52871902  | ZNF880                           | -1268   |
| rs9823439  | 0.002  | 3  | 17187502  | AC090644.1                       | -10288  |
| rs9398863  | 0.002  | 6  | 128320912 | OTTHUMG00000015536;PTPRK         | 0       |
| rs10488404 | 0.002  | 7  | 135867830 | OTTHUMG00000155618;AC009784.3    | 0       |
| rs6995285  | 0.002  | 8  | 142912389 | AC104417.1                       | -114471 |
| rs11224446 | 0.002  | 11 | 100659159 | ARHGAP42                         | 0       |
| rs9897212  | 0.002  | 17 | 60190630  | AC008158.1                       | -9051   |
| rs4327249  | 0.002  | 2  | 161454809 | RBMS1;OTTHUMG00000132031         | -104504 |
| rs2048917  | 0.002  | 4  | 182757120 | AC093669.1                       | -859    |
| rs1569661  | 0.002  | 1  | 37853334  | RP5-1090E8.1;OTTHUMG00000156996  | 56766   |
| rs10802462 | 0.002  | 1  | 247203657 | ZNF670;OTTHUMG00000040868        | 0       |
| rs4907474  | 0.002  | 13 | 113603905 | OTTHUMG00000017377;MCF2L         | 0       |
| rs2000260  | 0.002  | 1  | 108673405 | SLC25A24;OTTHUMG00000011013      | 4037    |
| rs11721418 | 0.002  | 4  | 63783090  | RP11-323K3.1;OTTHUMG00000160716  | 98578   |
| rs2667124  | 0.002  | 4  | 142907735 | INPP4B;OTTHUMG00000161341        | 36578   |
| rs11212409 | 0.002  | 11 | 96568786  | AP003781.2                       | -360930 |
| rs8027377  | 0.002  | 15 | 37439450  | MEIS2;OTTHUMG00000129781         | -45950  |
| rs9909925  | 0.002  | 17 | 57210069  | SKA2                             | 0       |
| rs9859735  | 0.002  | 3  | 89186377  | OTTHUMG00000159040;EPAH3         | 0       |
| rs254230   | 0.002  | 5  | 115885858 | OTTHUMG00000162987;SEMA6A        | 0       |
| rs10264084 | 0.002  | 7  | 150592362 | ABP1;OTTHUMG00000158306          | 33770   |
| rs2474589  | 0.002  | 10 | 38421921  | OTTHUMG00000017990;ZNF37A        | 9645    |
| rs2189555  | 0.0021 | 7  | 11329001  | AC004538.3;OTTHUMG00000152311    | 0       |
| rs1460235  | 0.0021 | 8  | 105890188 | RP11-200A13.1;OTTHUMG00000158678 | 103204  |
| rs7997770  | 0.0021 | 13 | 107081214 | OTTHUMG00000017320;RP11-165M6.3  | 2744    |
| rs2894249  | 0.0021 | 6  | -9        | N/A                              | -9      |
| rs3867319  | 0.0021 | 1  | 98964760  | AL160056.1                       | 125705  |
| rs13081263 | 0.0021 | 3  | 147409599 | RP11-321C3.1;OTTHUMG00000159461  | -99977  |
| rs10504551 | 0.0021 | 8  | 74875342  | TCEB1                            | 0       |
| rs2165988  | 0.0021 | 10 | 117028264 | OTTHUMG00000019096;ATRNL1        | 0       |
| rs10504552 | 0.0021 | 8  | 74875565  | TCEB1                            | 0       |
| rs3845197  | 0.0021 | 15 | 70215474  | TLE3                             | 125069  |
| rs11763095 | 0.0021 | 7  | 104091769 | OTTHUMG00000157273;LHFPL3        | 0       |
| rs10974366 | 0.0021 | 9  | 426740    | DOCK8;OTTHUMG00000078789         | 0       |

|            |        |    |           |                                  |         |
|------------|--------|----|-----------|----------------------------------|---------|
| rs3758549  | 0.0021 | 10 | 104004195 | OTTHUMG00000018955;GBF1          | -1094   |
| rs10741181 | 0.0021 | 10 | 130922242 | RP11-168C9.1;OTTHUMG00000019260  | -154273 |
| rs11236516 | 0.0021 | 11 | 75451668  | MOGAT2                           | 9008    |
| rs1450659  | 0.0021 | 5  | 41015303  | HEATR7B2;OTTHUMG000000162151     | 0       |
| rs17404123 | 0.0021 | 6  | 65303100  | EYS;OTTHUMG00000014971           | 0       |
| rs11780215 | 0.0021 | 8  | 118057538 | SLC30A8                          | 0       |
| rs4918747  | 0.0021 | 10 | 114153633 | OTTHUMG00000019060;ACSL5         | 0       |
| rs34148654 | 0.0021 | 6  | 65295448  | EYS;OTTHUMG00000014971           | 7576    |
| rs17475614 | 0.0021 | 14 | 26575516  | AL049831.1                       | 65856   |
| rs4820983  | 0.0021 | 22 | 31929654  | SFI1;OTTHUMG00000030249          | 0       |
| rs6705417  | 0.0021 | 2  | 74970937  | AC007387.2;OTTHUMG000000152924   | 0       |
| rs6560500  | 0.0021 | 9  | 78743564  | PCSK5;OTTHUMG00000020039         | 0       |
| rs1038673  | 0.0021 | 11 | 42947540  | AC090588.1                       | 335514  |
| rs8035763  | 0.0021 | 15 | 101916889 | PCSK6                            | 0       |
| rs4083497  | 0.0021 | 1  | 42079867  | OTTHUMG00000006361;HIVEP3        | 0       |
| rs3815574  | 0.0021 | 2  | 169963330 | OTTHUMG000000155318;AC007556.3   | 5610    |
| rs12662610 | 0.0021 | 6  | 65301824  | EYS;OTTHUMG00000014971           | 1200    |
| rs9356309  | 0.0021 | 6  | 165355783 | OTTHUMG00000015982;RP11-300M24.1 | 112677  |
| rs2305816  | 0.0021 | 7  | -9        | N/A                              | -9      |
| rs2340823  | 0.0022 | 1  | 161746678 | OTTHUMG00000023961;ATF6          | 0       |
| rs7119456  | 0.0022 | 11 | 96572887  | AP003781.2                       | -365031 |
| rs2833709  | 0.0022 | 21 | 33562926  | OTTHUMG00000085307;NCRNA00159    | 0       |
| rs7513248  | 0.0022 | 1  | 107873389 | OTTHUMG00000010965;NTNG1         | 0       |
| rs10024983 | 0.0022 | 4  | 61367045  | AC095061.1                       | 162622  |
| rs12660387 | 0.0022 | 6  | 65291644  | EYS;OTTHUMG00000014971           | 11380   |
| rs724322   | 0.0022 | 8  | 40038804  | C8orf4                           | 25983   |
| rs1735641  | 0.0022 | 10 | 38184852  | ZNF33CP;OTTHUMG00000017982       | 0       |
| rs17185348 | 0.0022 | 14 | 25364432  | STXBP6;OTTHUMG000000140186       | 0       |
| rs6085463  | 0.0022 | 20 | 6252538   | AL109618.1                       | -42943  |
| rs693691   | 0.0022 | 1  | 88845494  | AL445438.1                       | 98017   |
| rs870852   | 0.0022 | 3  | 159079017 | SCHIP1;OTTHUMG000000158934       | 0       |
| rs6682828  | 0.0022 | 1  | 200507096 | KIF14;OTTHUMG00000035723         | 13532   |
| rs10497222 | 0.0022 | 2  | 161748916 | AC064863.1                       | 14555   |
| rs1562041  | 0.0022 | 3  | 12285734  | AC090947.1                       | 0       |
| rs7908867  | 0.0022 | 10 | 64657915  | EGR2;OTTHUMG00000018308          | 0       |
| rs2675717  | 0.0022 | 11 | 83629911  | DLG2;OTTHUMG000000134309         | 0       |
| rs1321465  | 0.0022 | 20 | 53032161  | OTTHUMG00000032778;DOK5          | -59975  |

|            |        |    |           |                                  |         |
|------------|--------|----|-----------|----------------------------------|---------|
| rs10127714 | 0.0022 | 1  | 167066609 | OTTHUMG00000034434;DUSP27        | 0       |
| rs373745   | 0.0022 | 2  | 76249622  | OTTHUMG00000152944;SUCLA2P2      | 83520   |
| rs17034047 | 0.0022 | 3  | 1169240   | OTTHUMG00000119030;CNTN6         | 0       |
| rs10059576 | 0.0022 | 5  | 94167661  | MCTP1;OTTHUMG00000162742         | 0       |
| rs12341793 | 0.0022 | 9  | 23829824  | RP11-321L2.1;OTTHUMG00000019702  | 0       |
| rs4746343  | 0.0022 | 10 | 77760583  | OTTHUMG00000018532;C10orf11      | 0       |
| rs1543416  | 0.0022 | 22 | 31925073  | SFI1;OTTHUMG00000030249          | 0       |
| rs1891931  | 0.0022 | 1  | 165160578 | LMX1A;OTTHUMG00000034575         | 10526   |
| rs2155635  | 0.0022 | 11 | 115494597 | AP000997.1                       | 3203    |
| rs2678505  | 0.0022 | 2  | 233309066 | AC068134.4;OTTHUMG00000153337    | 0       |
| rs17013315 | 0.0022 | 4  | 129373425 | OTTHUMG00000161321;RP11-420A23.1 | 0       |
| rs251335   | 0.0022 | 5  | 52431636  | CTD-2366F13.1;OTTHUMG00000162191 | 20680   |
| rs12658154 | 0.0022 | 5  | 124242807 | RP11-284A20.1;OTTHUMG00000162992 | -12833  |
| rs2029944  | 0.0022 | 5  | 162962709 | OTTHUMG00000130379;MAT2B         | 16367   |
| rs9448292  | 0.0022 | 6  | 78811692  | AL050340.1                       | 164704  |
| rs7923550  | 0.0022 | 10 | 20669511  | RP11-337N19.1;OTTHUMG00000017782 | 29482   |
| rs10995205 | 0.0022 | 10 | 64304083  | OTTHUMG00000018302;ZNF365        | 0       |
| rs4883941  | 0.0022 | 13 | 73991021  | RP11-30C8.2;OTTHUMG00000017077   | 0       |
| rs11616207 | 0.0022 | 13 | 75823916  | RP11-159J2.2;OTTHUMG00000017086  | -700    |
| rs555860   | 0.0022 | 22 | 27592742  | CTA-503F6.2;OTTHUMG00000150949   | -7431   |
| rs11240239 | 0.0023 | 1  | 204612804 | OTTHUMG00000035989;LRRN2         | 0       |
| rs6533660  | 0.0023 | 4  | 113860920 | OTTHUMG00000132912;ANK2          | 0       |
| rs1359096  | 0.0023 | 9  | 10275924  | PTPRD;OTTHUMG000000021005        | 0       |
| rs7095016  | 0.0023 | 10 | 23610272  | C10orf67;OTTHUMG00000017818      | 0       |
| rs10770061 | 0.0023 | 11 | 9796699   | AC026250.1                       | 0       |
| rs11038404 | 0.0023 | 11 | 45360514  | SYT13                            | -52630  |
| rs1029287  | 0.0023 | 16 | 13830450  | OTTHUMG00000048194;ERCC4         | -183564 |
| rs349433   | 0.0023 | 1  | 42255087  | OTTHUMG00000006361;HIVEP3        | 0       |
| rs2311731  | 0.0023 | 2  | 57884793  | AC073875.1                       | 113059  |
| rs6934970  | 0.0023 | 6  | 113124301 | AL360015.1                       | -168394 |
| rs1445167  | 0.0023 | 10 | 49772204  | ARHGAP22;OTTHUMG00000018176      | 0       |
| rs314690   | 0.0023 | 13 | 80008957  | RP11-30E17.3;OTTHUMG00000017131  | 11867   |
| rs12401299 | 0.0023 | 1  | 161834446 | OTTHUMG00000023961;ATF6          | 0       |
| rs2147798  | 0.0023 | 1  | 201061818 | CACNA1S;OTTHUMG00000035784       | 0       |
| rs2241994  | 0.0023 | 3  | 119110006 | ARHGAP31;OTTHUMG00000159362      | 0       |
| rs6945071  | 0.0023 | 7  | 26122423  | NFE2L3;OTTHUMG00000023882        | -69437  |
| rs356908   | 0.0023 | 18 | 26335829  | AC015963.1                       | -292755 |

|            |        |    |           |                                  |         |
|------------|--------|----|-----------|----------------------------------|---------|
| rs12618201 | 0.0023 | 2  | 174436533 | AC013410.1;OTTHUMG00000154130    | 3305    |
| rs7755548  | 0.0023 | 6  | 78844965  | AL050340.1                       | 197977  |
| rs6860776  | 0.0023 | 5  | 22699592  | CDH12;OTTHUMG00000090591         | 0       |
| rs279395   | 0.0023 | 5  | 167076076 | AC093304.1                       | 221474  |
| rs10503198 | 0.0023 | 8  | 3026578   | CSMD1                            | 0       |
| rs13080    | 0.0023 | 13 | 31906141  | OTTHUMG00000016688;B3GALTL       | 0       |
| rs1868466  | 0.0023 | 16 | 77743558  | AC092724.1                       | -640    |
| rs1392128  | 0.0023 | 1  | 56066552  | OTTHUMG00000008246;RP11-466L17.1 | 0       |
| rs7813910  | 0.0023 | 8  | 142912425 | AC104417.1                       | -114435 |
| rs16917845 | 0.0023 | 10 | 64660397  | EGR2;OTTHUMG00000018308          | 0       |
| rs1348292  | 0.0023 | 13 | 88605858  | OTTHUMG00000017168;RP11-471M2.1  | -61131  |
| rs16858531 | 0.0023 | 1  | 167102292 | OTTHUMG00000034434;DUSP27        | 3890    |
| rs10869601 | 0.0023 | 9  | 78230797  | RP11-470F18.1;OTTHUMG00000020036 | 27333   |
| rs5759611  | 0.0023 | 22 | 23503121  | RAB36;OTTHUMG00000150601         | 0       |
| rs11945247 | 0.0023 | 4  | 174818889 | OTTHUMG00000160736;RP11-161D15.1 | 0       |
| rs2723576  | 0.0023 | 7  | 17768730  | AC006482.1;OTTHUMG00000152728    | 48447   |
| rs10758922 | 0.0023 | 9  | 8017065   | OTTHUMG00000046176;RP11-29B9.2   | -55985  |
| rs2075120  | 0.0023 | 22 | 17326432  | AC007064.28;OTTHUMG00000155832   | 0       |
| rs2136834  | 0.0023 | 2  | 120729505 | PTPN4;OTTHUMG00000131436         | 0       |
| rs11683306 | 0.0023 | 2  | 236294145 | AC092576.1                       | 59050   |
| rs6583239  | 0.0023 | 3  | 197328215 | OTTHUMG00000155479;AC024560.3    | 0       |
| rs12661208 | 0.0023 | 6  | 65302728  | EYS;OTTHUMG00000014971           | 296     |
| rs2284340  | 0.0023 | 14 | 92389047  | FBLN5                            | 0       |
| rs10748478 | 0.0023 | 1  | 105235237 | N/A                              | -9      |
| rs950047   | 0.0023 | 10 | 130205063 | OTTHUMG00000019256;RP11-264E18.1 | -86585  |
| rs9529974  | 0.0023 | 13 | 72821936  | AL139003.1                       | 206104  |
| rs12213485 | 0.0023 | 6  | 8134765   | OTTHUMG00000014221;EEF1E1        | -31954  |
| rs3734992  | 0.0023 | 7  | 131862530 | PLXNA4;OTTHUMG00000155108        | 0       |
| rs17374896 | 0.0023 | 13 | 23853700  | OTTHUMG00000016563;SGCG          | 0       |
| rs11074155 | 0.0023 | 15 | 93826771  | AC112693.1                       | 2693    |
| rs3827147  | 0.0024 | 20 | 256727    | OTTHUMG00000031626;C20orf96      | 0       |
| rs1359660  | 0.0024 | 13 | 105529957 | RP11-217F17.1;OTTHUMG00000017316 | 62537   |
| rs17322629 | 0.0024 | 16 | 56081161  | AC040168.1                       | 45738   |
| rs10157423 | 0.0024 | 1  | 170328661 | RP11-576I22.1;OTTHUMG00000034663 | 9703    |
| rs1954604  | 0.0024 | 1  | 191558155 | OTTHUMG00000041126;RP11-541F9.1  | 269682  |
| rs4761128  | 0.0024 | 12 | 84790507  | AC090679.1                       | -213280 |
| rs7761526  | 0.0024 | 6  | 140013919 | RP11-15H7.2;OTTHUMG00000015696   | 31275   |

|            |        |    |           |                                  |         |
|------------|--------|----|-----------|----------------------------------|---------|
| rs1854444  | 0.0024 | 9  | 92870113  | OTTHUMG00000020190;RP11-406A20.2 | -25312  |
| rs2749588  | 0.0024 | 10 | 38269457  | OTTHUMG00000153548;RP11-393J16.4 | 0       |
| rs11059815 | 0.0024 | 12 | 129149116 | TMEM132C                         | 0       |
| rs1979026  | 0.0024 | 15 | 80738546  | ARNT2                            | 0       |
| rs756765   | 0.0024 | 17 | 8850300   | OTTHUMG00000108197;PIK3R5        | 0       |
| rs6698197  | 0.0024 | 1  | 66224122  | AL513493.1                       | 2619    |
| rs10086454 | 0.0024 | 8  | 131411249 | ASAP1                            | 0       |
| rs8041887  | 0.0024 | 15 | 80752069  | ARNT2                            | 0       |
| rs10865972 | 0.0024 | 3  | 52491447  | NISCH;OTTHUMG00000158571         | 0       |
| rs10013750 | 0.0024 | 4  | 13501092  | OTTHUMG00000090543;RAB28         | -15103  |
| rs6811786  | 0.0024 | 4  | 142175454 | OTTHUMG00000161379;RP11-586L23.1 | 0       |
| rs4835587  | 0.0024 | 4  | 150440015 | OTTHUMG00000161394;RP11-526A4.1  | 0       |
| rs2073151  | 0.0024 | 6  | -9        | N/A                              | -9      |
| rs1933511  | 0.0024 | 6  | 78911699  | AL050340.1                       | 264711  |
| rs6455976  | 0.0024 | 6  | 165359103 | OTTHUMG00000015982;RP11-300M24.1 | 115997  |
| rs2981277  | 0.0024 | 8  | 61488824  | RAB2A;OTTHUMG00000134298         | 0       |
| rs10834796 | 0.0024 | 11 | 25793308  | RPL36AP40;OTTHUMG00000158318     | -182967 |
| rs9899533  | 0.0024 | 17 | 8068045   | VAMP2;OTTHUMG00000150254         | -1181   |
| rs10153433 | 0.0024 | 18 | 50073517  | DCC;OTTHUMG00000132698           | 0       |
| rs17357586 | 0.0024 | 1  | 27873001  | OTTHUMG00000003398;AHDC1         | 0       |
| rs3129941  | 0.0024 | 6  | -9        | N/A                              | -9      |
| rs13261232 | 0.0024 | 8  | 117187338 | AF130342.1                       | 0       |
| rs4143531  | 0.0025 | 5  | 154978195 | AC010591.1                       | 189835  |
| rs644086   | 0.0025 | 11 | 86205826  | ME3                              | 0       |
| rs813565   | 0.0025 | 13 | 60814675  | OTTHUMG00000017005;RP11-359P14.1 | -25595  |
| rs16851622 | 0.0025 | 1  | 161802049 | OTTHUMG00000023961;ATF6          | 0       |
| rs12490009 | 0.0025 | 3  | 22000946  | OTTHUMG00000155585;AC096918.1    | 0       |
| rs10505400 | 0.0025 | 8  | 122367142 | RP11-414D17.1;OTTHUMG00000158692 | 25235   |
| rs7837686  | 0.0025 | 8  | 142674928 | AC138647.1;OTTHUMG00000156281    | 146091  |
| rs2880056  | 0.0025 | 1  | 161876448 | OTTHUMG00000023961;ATF6          | 0       |
| rs659340   | 0.0025 | 1  | 233815677 | KCNK1;OTTHUMG00000037923         | 7419    |
| rs796988   | 0.0025 | 4  | 185333092 | IRF2;OTTHUMG00000160606          | 0       |
| rs9395027  | 0.0025 | 6  | 44444731  | CDC5L;OTTHUMG00000014767         | 26568   |
| rs10890823 | 0.0025 | 11 | 96571872  | AP003781.2                       | -364016 |
| rs10140136 | 0.0025 | 14 | 37488188  | SLC25A21;OTTHUMG00000140250      | 0       |
| rs1108183  | 0.0025 | 1  | 38559394  | OTTHUMG00000000478;RP5-884C9.2   | 0       |
| rs12465230 | 0.0025 | 2  | 161455074 | RBMS1;OTTHUMG00000132031         | -104769 |



|            |        |    |           |                                  |         |
|------------|--------|----|-----------|----------------------------------|---------|
| rs1534624  | 0.0025 | 6  | 131496719 | OTTHUMG00000015563;AKAP7         | 0       |
| rs1012127  | 0.0025 | 7  | 70870965  | OTTHUMG00000129783;WBSCR17       | 0       |
| rs17153217 | 0.0025 | 7  | 26128758  | NFE2L3;OTTHUMG00000023882        | -63102  |
| rs10787446 | 0.0025 | 10 | 114155827 | OTTHUMG00000019060;ACSL5         | 0       |
| rs1868468  | 0.0025 | 16 | 77743758  | AC092724.1                       | -440    |
| rs2836672  | 0.0025 | 21 | 40133027  | NCRNA00114;OTTHUMG00000090771    | 0       |
| rs552124   | 0.0025 | 1  | 32266026  | SPOCD1;OTTHUMG00000003879        | 0       |
| rs12145590 | 0.0025 | 1  | 59912718  | OTTHUMG00000008424;FGGY          | 0       |
| rs16841426 | 0.0025 | 2  | 158117300 | GALNT5;OTTHUMG00000131965        | 0       |
| rs389435   | 0.0025 | 20 | 15045412  | AL031677.2                       | 41808   |
| rs700042   | 0.0025 | 1  | 217242800 | ESRRG;OTTHUMG00000037025         | 0       |
| rs2056443  | 0.0025 | 13 | 31905942  | OTTHUMG00000016688;B3GALTL       | 0       |
| rs1742643  | 0.0025 | 14 | 46560411  | N/A                              | -9      |
| rs1961635  | 0.0025 | 15 | 54887443  | UNC13C                           | 0       |
| rs239341   | 0.0025 | 1  | 42255221  | OTTHUMG00000006361;HIVEP3        | 0       |
| rs17695268 | 0.0025 | 5  | 57532246  | CTD-2037L6.1;OTTHUMG00000162197  | 74667   |
| rs17287702 | 0.0025 | 8  | 131396561 | ASAP1                            | 0       |
| rs16917407 | 0.0025 | 10 | 64304454  | OTTHUMG00000018302;ZNF365        | 0       |
| rs10762615 | 0.0025 | 10 | 76203850  | OTTHUMG00000018506;ADK           | 0       |
| rs6517650  | 0.0025 | 21 | 42466753  | C21orf130;OTTHUMG00000086741     | 46674   |
| rs17543807 | 0.0025 | 3  | 19614280  | KCNH8;OTTHUMG00000129891         | 37142   |
| rs3129934  | 0.0025 | 6  | -9        | N/A                              | -9      |
| rs2305341  | 0.0025 | 12 | 7293796   | CLSTN3                           | 0       |
| rs10878895 | 0.0025 | 12 | 69400433  | CPM                              | -73769  |
| rs6014011  | 0.0025 | 20 | 53033915  | OTTHUMG00000032778;DOK5          | -58221  |
| rs9257816  | 0.0025 | 6  | -9        | N/A                              | -9      |
| rs11013359 | 0.0025 | 10 | 23557711  | C10orf67;OTTHUMG00000017818      | 0       |
| rs6551565  | 0.0025 | 4  | 61367078  | AC095061.1                       | 162589  |
| rs12652689 | 0.0025 | 5  | 18583286  | AC113389.1                       | 35572   |
| rs6595051  | 0.0025 | 5  | 117100716 | OTTHUMG00000162891;RP11-74D3.1   | 13805   |
| rs17403955 | 0.0025 | 6  | 65301679  | EYS;OTTHUMG00000014971           | 1345    |
| rs12539936 | 0.0025 | 7  | 87110017  | AC002457.1                       | 0       |
| rs12293882 | 0.0025 | 11 | 36847779  | C11orf74                         | 166958  |
| rs7933171  | 0.0025 | 11 | 96570862  | AP003781.2                       | -363006 |
| rs6085637  | 0.0025 | 20 | 6619725   | RP5-859D4.3;OTTHUMG00000031832   | 92180   |
| rs964602   | 0.0025 | 21 | 33220858  | TPT1P;OTTHUMG00000084902         | 7688    |
| rs9831421  | 0.0026 | 3  | 144993269 | RP11-622L21.1;OTTHUMG00000159390 | -248056 |

|            |        |    |           |                                  |         |
|------------|--------|----|-----------|----------------------------------|---------|
| rs188551   | 0.0026 | 12 | 29968996  | TMTC1                            | -31304  |
| rs7530997  | 0.0026 | 1  | 161810151 | OTTHUMG00000023961;ATF6          | 0       |
| rs9448881  | 0.0026 | 6  | 80786375  | RP11-296E7.2;OTTHUMG00000015090  | 1071    |
| rs17473072 | 0.0026 | 6  | 130139447 | OTTHUMG00000015552;RP11-174C7.3  | 1374    |
| rs1294882  | 0.0026 | 7  | 45248035  | OTTHUMG00000023729;RAMP3         | 22134   |
| rs7083348  | 0.0026 | 10 | 19342086  | AL391992.1                       | 0       |
| rs63375    | 0.0026 | 18 | 26357669  | AC015963.1                       | -270915 |
| rs2838737  | 0.0026 | 21 | 46335580  | ITGB2;OTTHUMG00000090257         | 0       |
| rs17424028 | 0.0026 | 1  | 48217969  | OTTHUMG00000007958;RP11-543D5.2  | 8835    |
| rs10068845 | 0.0026 | 5  | 91475541  | OTTHUMG00000162609;RP11-348J24.2 | 0       |
| rs919052   | 0.0026 | 4  | 75938373  | RP11-44F21.2;OTTHUMG00000160828  | 0       |
| rs30274    | 0.0026 | 5  | 155661743 | SGCD                             | -92024  |
| rs4545101  | 0.0026 | 8  | 10085683  | MSRA;OTTHUMG00000090517          | 0       |
| rs7922922  | 0.0026 | 10 | 80011811  | RP11-90J7.3;OTTHUMG00000018555   | 0       |
| rs7289941  | 0.0026 | 22 | 31884405  | EIF4ENIF1;OTTHUMG00000030793     | 0       |
| rs2516675  | 0.0026 | 6  | -9        | N/A                              | -9      |
| rs7758642  | 0.0026 | 6  | 129695639 | OTTHUMG00000015545;LAMA2         | 0       |
| rs7838405  | 0.0026 | 8  | 139752948 | COL22A1;OTTHUMG00000150035       | 0       |
| rs1886844  | 0.0026 | 20 | 4239658   | OTTHUMG00000031779;ADRA1D        | -9937   |
| rs12663622 | 0.0026 | 6  | 65301787  | EYS;OTTHUMG00000014971           | 1237    |
| rs1883625  | 0.0026 | 6  | 148792617 | OTTHUMG00000015773;SASH1         | 0       |
| rs16920157 | 0.0026 | 8  | 55308164  | AC027250.1                       | -24864  |
| rs17304841 | 0.0026 | 4  | 183029476 | OTTHUMG00000133641;AC108142.1    | 0       |
| rs4077841  | 0.0026 | 1  | 14020405  | AL359771.1                       | 2160    |
| rs12048425 | 0.0026 | 1  | 218020134 | OTTHUMG00000037875;SPATA17       | 0       |
| rs7016464  | 0.0026 | 8  | 70970809  | PRDM14;OTTHUMG00000150495        | 0       |
| rs10883450 | 0.0026 | 10 | 101923421 | OTTHUMG00000018900;ERLIN1        | 0       |
| rs2035639  | 0.0026 | 11 | 7335424   | SYT9                             | 0       |
| rs2673728  | 0.0026 | 12 | 108820427 | AC010206.1                       | 7480    |
| rs7999592  | 0.0026 | 13 | 60750006  | AL356502.1                       | 11866   |
| rs10181531 | 0.0026 | 2  | 229626575 | OTTHUMG00000153591;AC007677.1    | 8073    |
| rs2514867  | 0.0026 | 8  | 108398309 | ANGPT1                           | 0       |
| rs11200108 | 0.0026 | 10 | 123488067 | OTTHUMG00000019177;RP11-78A18.2  | -7751   |
| rs1518754  | 0.0026 | 11 | 36827869  | C11orf74                         | 147048  |
| rs17377828 | 0.0027 | 1  | 42824317  | RP11-223A3.1;OTTHUMG00000007027  | -20270  |
| rs7549333  | 0.0027 | 1  | 157196700 | OTTHUMG00000017482;RP11-85G21.1  | 5321    |
| rs326091   | 0.0027 | 5  | 99581249  | AC092278.1                       | 91766   |

|            |        |    |           |                                 |         |
|------------|--------|----|-----------|---------------------------------|---------|
| rs17462606 | 0.0027 | 9  | 95370664  | OTTHUMG00000020228;CENPP        | 0       |
| rs1017713  | 0.0027 | 11 | 75499452  | DGAT2                           | 0       |
| rs1030876  | 0.0027 | 2  | 211970680 | AC013404.1;OTTHUMG00000154747   | 192986  |
| rs349180   | 0.0027 | 4  | 60811439  | AC092596.2                      | 111554  |
| rs1003236  | 0.0027 | 5  | 154978382 | AC010591.1                      | 190022  |
| rs6470536  | 0.0027 | 8  | 128590176 | AC018714.1                      | -95792  |
| rs9806037  | 0.0027 | 14 | 37489008  | SLC25A21;OTTHUMG00000140250     | 0       |
| rs12044569 | 0.0027 | 1  | 167066796 | OTTHUMG00000034434;DUSP27       | 0       |
| rs12897959 | 0.0027 | 14 | 24233906  | AL160237.1                      | -27233  |
| rs12567502 | 0.0027 | 1  | 8808820   | RERE;OTTHUMG00000001765         | 0       |
| rs627494   | 0.0027 | 1  | 75686746  | OTTHUMG00000009721;SLC44A5      | 0       |
| rs2341469  | 0.0027 | 1  | 161862021 | OTTHUMG00000023961;ATF6         | 0       |
| rs2029943  | 0.0027 | 5  | 162962771 | OTTHUMG00000130379;MAT2B        | 16429   |
| rs914481   | 0.0027 | 6  | 78772505  | AL050340.1                      | 125517  |
| rs4812831  | 0.0027 | 20 | 43018260  | RP5-881L22.4;OTTHUMG00000032525 | 0       |
| rs938066   | 0.0027 | 2  | 196001454 | AC010983.1;OTTHUMG00000154373   | -110360 |
| rs6762970  | 0.0027 | 3  | 74742625  | CNTN3;OTTHUMG00000158813        | -172334 |
| rs1946704  | 0.0027 | 3  | 149397793 | WWTR1;OTTHUMG00000159614        | 0       |
| rs316191   | 0.0027 | 5  | 96507627  | RIOK2;OTTHUMG00000128723        | 0       |
| rs1333344  | 0.0027 | 9  | 111776224 | OTTHUMG00000020466;CTNNAL1      | -415    |
| rs12286075 | 0.0027 | 11 | 20958794  | NELL1                           | 0       |
| rs11703361 | 0.0027 | 22 | 32850349  | BPIL2;OTTHUMG00000058273        | 0       |
| rs9828822  | 0.0027 | 3  | 89213912  | OTTHUMG00000159040;EPHA3        | 0       |
| rs6789884  | 0.0027 | 3  | 165172773 | RP11-85M11.2;OTTHUMG00000158130 | 0       |
| rs11216833 | 0.0027 | 11 | 118119957 | MPZL3                           | 0       |
| rs6737230  | 0.0027 | 2  | 161464707 | RBMS1;OTTHUMG00000132031        | -114402 |
| rs3774230  | 0.0027 | 3  | 179521638 | PEX5L;OTTHUMG00000157363        | 0       |
| rs358260   | 0.0027 | 4  | 22788560  | GBA3;OTTHUMG00000160448         | 0       |
| rs12212103 | 0.0027 | 6  | 78867891  | AL050340.1                      | 220903  |
| rs1553443  | 0.0027 | 1  | 161771516 | OTTHUMG00000023961;ATF6         | 0       |
| rs1426510  | 0.0027 | 2  | 17782556  | OTTHUMG00000090645;VSNL1        | 0       |
| rs365719   | 0.0027 | 5  | 8527844   | OTTHUMG00000161716;RP11-417J1.1 | 0       |
| rs1231499  | 0.0027 | 6  | 91435263  | OTTHUMG00000015217;MAP3K7       | -138499 |
| rs1886513  | 0.0027 | 13 | 74566403  | KLF12;OTTHUMG00000017078        | 0       |
| rs3844589  | 0.0027 | 3  | 32445246  | OTTHUMG00000155869;CMTM7        | 0       |
| rs4709021  | 0.0027 | 6  | 164300258 | RP1-230L10.1;OTTHUMG00000015979 | 119385  |
| rs3924865  | 0.0027 | 8  | 131429723 | ASAP1                           | -15506  |

|            |                                                                                  |    |           |                              |       |
|------------|----------------------------------------------------------------------------------|----|-----------|------------------------------|-------|
| rs1359095  | 0.0027                                                                           | 9  | 10276100  | PTPRD;OTTHUMG00000021005     | 0     |
| rs1001959  | 0.0027                                                                           | 9  | 38151190  | AL161448.1                   | 3632  |
| rs11767726 | 0.0027                                                                           | 7  | 150018096 | ACTR3C;OTTHUMG000000158323   | 0     |
| rs10811758 | 0.0027                                                                           | 9  | 2275401   | OTTHUMG000000019445;SMARCA2  | 81777 |
| rs3827153  | 0.0027                                                                           | 20 | 257032    | OTTHUMG000000031626;C20orf96 | 0     |
|            | <b>a - Single nucleotide polymorphism identification number for NCBI's dbSNP</b> |    |           |                              |       |
