# Supplementary material for: Gene by Sex Interaction for Measures of Obesity in the Framingham Heart Study
Source: Hindawi journal article supplement (doi:10.1155/2011/329038), 2010-12-26
Supplement: f3 [file 329038.f3.pdf]

| <b>S3.6 Body Mass Index GxS Consensus</b> |                  |                   |                   |                  |
|-------------------------------------------|------------------|-------------------|-------------------|------------------|
|                                           | <b>rs1455703</b> | <b>rs12122774</b> | <b>rs10157397</b> | <b>rs7552206</b> |
| <b>Minor Allele Frequency</b>             | 0.31-0.32        | 0.31-0.33         | 0.31-0.32         | 0.30-0.31        |
| <b>Exam 1 P value</b>                     | 0.00064          | 0.00107           | 0.00154           | 0.00121          |
| <b>Exam 2 P value</b>                     | 0.00172          | 0.00122           | 0.00186           | 0.00095          |
| <b>Exam 3 P value</b>                     | 0.00117          | 0.00068           | 0.0014            | 0.0005           |
| <b>Exam 4 P value</b>                     | 0.00028          | 0.00029           | 0.00034           | 0.00021          |
| <b>Exam 5 P value</b>                     | 0.0001           | 0.00014           | 0.00018           | 0.00017          |
| <b>Exam 1 rank<sup>a</sup></b>            | 344              | 534               | 753               | 604              |
| <b>Exam 2 rank<sup>a</sup></b>            | 697              | 470               | 759               | 375              |
| <b>Exam 3 rank<sup>a</sup></b>            | 508              | 279               | 598               | 199              |
| <b>Exam 4 rank<sup>a</sup></b>            | 117              | 121               | 146               | 98               |
| <b>Exam 5 rank<sup>a</sup></b>            | 64               | 78                | 112               | 100              |
| <b>Chromosome</b>                         | 1                | 1                 | 1                 | 1                |
| <b>Coordinate</b>                         | 219500145        | 219488567         | 219484329         | 219492898        |

a - rank of SNP according to gene by sex interaction p-value
