# Supplementary material for: Gene by Sex Interaction for Measures of Obesity in the Framingham Heart Study
Source: Hindawi journal article supplement (doi:10.1155/2011/329038), 2010-12-26
Supplement: f4 [file 329038.f4.pdf]

**Table S4.7 rs7566605 Associations with Traits in Framingham Heart Study**

|                                         |                              | Generation<br>2, Exam 1 | Generation<br>2, Exam 2 | Generation<br>2, Exam 3 | Generation<br>2, Exam 4 | Generation<br>2, Exam 5 | Generation 3,<br>Exam 1 |
|-----------------------------------------|------------------------------|-------------------------|-------------------------|-------------------------|-------------------------|-------------------------|-------------------------|
| <b>All, Gene by Sex<br/>Interaction</b> | <b>BMI<sup>a</sup></b>       | 0.05807006              | 0.22487157              | 0.38694382              | 0.30011931              | 0.33289131              | 0.3913464               |
|                                         | <b>WC<sup>b</sup></b>        | NA                      | NA                      | NA                      | 0.45165956              | 0.35542662              | 0.390952399             |
|                                         | <b>HC<sup>c</sup></b>        | NA                      | NA                      | NA                      | 0.06734971              | 0.58565327              | NA                      |
|                                         | <b>WHR<sup>d</sup></b>       | NA                      | NA                      | NA                      | 0.25304595              | 0.44738528              | NA                      |
|                                         | <b>Weight</b>                | <b>0.02039964</b>       | 0.05097084              | 0.76260037              | 0.66226656              | 0.12699679              | 0.175672798             |
|                                         | <b>Height</b>                | 0.4387237               | 0.24929678              | 0.33957325              | 0.58730341              | 0.54558324              | 0.30805311              |
|                                         | <b>WC + BMI<sup>e</sup></b>  | NA                      | NA                      | NA                      | 0.61235018              | 0.62347335              | 0.887114502             |
|                                         | <b>HC + BMI<sup>f</sup></b>  | NA                      | NA                      | NA                      | 0.05920279              | 0.80826209              | NA                      |
|                                         | <b>WHR + BMI<sup>g</sup></b> | NA                      | NA                      | NA                      | 0.05744209              | 0.55565838              | NA                      |
| <b>All, Main Effect</b>                 | <b>BMI<sup>a</sup></b>       | <b>0.01377222</b>       | 0.063052                | <b>0.01758538</b>       | <b>0.00879425</b>       | <b>0.02163589</b>       | 0.195547751             |
|                                         | <b>WC<sup>b</sup></b>        | NA                      | NA                      | NA                      | <b>0.00126127</b>       | <b>0.01761116</b>       | 0.899351001             |
|                                         | <b>HC<sup>c</sup></b>        | NA                      | NA                      | NA                      | <b>0.02649107</b>       | <b>0.02718617</b>       | NA                      |
|                                         | <b>WHR<sup>d</sup></b>       | NA                      | NA                      | NA                      | <b>0.00411485</b>       | 0.0965543               | NA                      |
|                                         | <b>Weight</b>                | <b>0.00663889</b>       | <b>0.0201383</b>        | <b>0.01412799</b>       | <b>0.00618055</b>       | <b>0.00519717</b>       | 0.404394364             |
|                                         | <b>Height</b>                | 0.58046048              | 0.20096172              | 0.36858153              | 0.593927                | 0.12353917              | 0.679349298             |
|                                         | <b>WC + BMI<sup>e</sup></b>  | NA                      | NA                      | NA                      | 0.14258887              | 0.34087861              | <b>0.021016949</b>      |
|                                         | <b>HC + BMI<sup>f</sup></b>  | NA                      | NA                      | NA                      | 0.69638489              | 0.71291503              | NA                      |
|                                         | <b>WHR + BMI<sup>g</sup></b> | NA                      | NA                      | NA                      | 0.08959536              | 0.50023379              | NA                      |
| <b>Men, Main Effect</b>                 | <b>BMI<sup>a</sup></b>       | <b>0.0006257</b>        | <b>0.01579299</b>       | 0.26086616              | 0.10215984              | <b>0.02067983</b>       | 0.137474263             |
|                                         | <b>WC<sup>b</sup></b>        | NA                      | NA                      | NA                      | <b>0.04118046</b>       | <b>0.0237965</b>        | 0.581132196             |
|                                         | <b>HC<sup>c</sup></b>        | NA                      | NA                      | NA                      | 0.51260786              | <b>0.01439945</b>       | NA                      |
|                                         | <b>WHR<sup>d</sup></b>       | NA                      | NA                      | NA                      | <b>0.00621889</b>       | 0.14849105              | NA                      |
|                                         | <b>Weight</b>                | <b>0.00029702</b>       | <b>0.0031732</b>        | 0.18470055              | 0.06634757              | <b>0.00550879</b>       | 0.185341304             |
|                                         | <b>Height</b>                | 0.45985153              | 0.2280426               | 0.57554919              | 0.61484536              | 0.18199155              | 0.807794295             |
|                                         | <b>WC + BMI<sup>e</sup></b>  | NA                      | NA                      | NA                      | 0.19436422              | 0.35050214              | 0.053636451             |
|                                         | <b>HC + BMI<sup>f</sup></b>  | NA                      | NA                      | NA                      | 0.2853657               | 0.36835186              | NA                      |
|                                         | <b>WHR + BMI<sup>g</sup></b> | NA                      | NA                      | NA                      | <b>0.02525088</b>       | 0.53591364              | NA                      |
| <b>Women, Main Effect</b>               | <b>BMI<sup>a</sup></b>       | 0.58083212              | 0.35654164              | <b>0.01479088</b>       | <b>0.02055718</b>       | 0.16820371              | 0.469285697             |
|                                         | <b>WC<sup>b</sup></b>        | NA                      | NA                      | NA                      | <b>0.0146193</b>        | 0.32094043              | 0.861349537             |
|                                         | <b>HC<sup>c</sup></b>        | NA                      | NA                      | NA                      | <b>0.01993016</b>       | 0.30169257              | NA                      |
|                                         | <b>WHR<sup>d</sup></b>       | NA                      | NA                      | NA                      | 0.35360079              | 0.4814017               | NA                      |

|  |                              |            |            |                   |                  |            |             |
|--|------------------------------|------------|------------|-------------------|------------------|------------|-------------|
|  | <b>Weight</b>                | 0.59444246 | 0.42169367 | <b>0.01685484</b> | <b>0.0385898</b> | 0.21400031 | 0.985628089 |
|  | <b>Height</b>                | 0.97218059 | 0.76534366 | 0.89963553        | 0.85953524       | 0.76235092 | 0.175877501 |
|  | <b>WC + BMI<sup>e</sup></b>  | NA         | NA         | NA                | 0.55795391       | 0.65990306 | 0.116801438 |
|  | <b>HC + BMI<sup>f</sup></b>  | NA         | NA         | NA                | 0.3491483        | 0.84619635 | NA          |
|  | <b>WHR + BMI<sup>g</sup></b> | NA         | NA         | NA                | 0.81017815       | 0.75172707 | NA          |
