# Supplementary material for: Gene by Sex Interaction for Measures of Obesity in the Framingham Heart Study
Source: Hindawi journal article supplement (doi:10.1155/2011/329038), 2010-12-26
Supplement: f5 [file 329038.f5.pdf]

### S5.6 Body Mass Index Main Effect Top 1000 Hits - Generation 3 Exam 1

| rs <sup>a</sup> | P-value  | Chromosome | Coordinates | Closest Gene                     | Distance To Gene |
|-----------------|----------|------------|-------------|----------------------------------|------------------|
| rs4143796       | 8.37E-07 | 2          | 77205032    | LRRTM4;OTTHUMG000000152842       | 0                |
| rs1446724       | 1.45E-06 | 2          | 77222224    | OTTHUMG000000152840;AC079117.1   | 0                |
| rs7753068       | 2.55E-06 | 6          | 155219158   | OTTHUMG00000015877;RBM16         | 0                |
| rs17161914      | 2.71E-06 | 7          | 140813472   | AC006362.1                       | 61263            |
| rs17013595      | 4.08E-06 | 2          | 77235523    | OTTHUMG000000152840;AC079117.1   | 0                |
| rs1446704       | 4.45E-06 | 2          | 77235219    | OTTHUMG000000152840;AC079117.1   | 0                |
| rs6500760       | 4.82E-06 | 16         | 6180375     | AC012175.1                       | -369586          |
| rs2058144       | 5.81E-06 | 4          | 15992702    | PROM1;OTTHUMG000000160180        | 0                |
| rs8023369       | 5.97E-06 | 15         | 58482194    | AQP9;OTTHUMG000000132631         | 4084             |
| rs1446725       | 6.06E-06 | 2          | 77222421    | OTTHUMG000000152840;AC079117.1   | 0                |
| rs1446693       | 7.52E-06 | 2          | 77262967    | LRRTM4;OTTHUMG000000152842       | 0                |
| rs2237936       | 7.90E-06 | 11         | 17874548    | SERGEF                           | 0                |
| rs17477995      | 1.03E-05 | 4          | 15997097    | PROM1;OTTHUMG000000160180        | 0                |
| rs12634756      | 1.08E-05 | 3          | 28808844    | AC109586.1;OTTHUMG000000155718   | 9548             |
| rs7597923       | 1.09E-05 | 2          | 77234853    | OTTHUMG000000152840;AC079117.1   | 0                |
| rs6547118       | 1.68E-05 | 2          | 77248425    | LRRTM4;OTTHUMG000000152842       | 0                |
| rs10192262      | 2.18E-05 | 2          | 77174412    | LRRTM4;OTTHUMG000000152842       | 0                |
| rs2028913       | 2.31E-05 | 2          | 77252200    | LRRTM4;OTTHUMG000000152842       | 0                |
| rs3925065       | 2.37E-05 | 3          | 157667114   | AC055761.1                       | -18600           |
| rs10520176      | 2.60E-05 | 2          | 77217310    | OTTHUMG000000152840;AC079117.1   | 0                |
| rs2517611       | 2.77E-05 | 6          | -9          | N/A                              | -9               |
| rs735815        | 2.83E-05 | 2          | 68511584    | OTTHUMG000000129565;CNRIP1       | 0                |
| rs2517618       | 2.85E-05 | 6          | -9          | N/A                              | -9               |
| rs187262        | 2.86E-05 | 5          | 79855876    | ANKRD34B;OTTHUMG000000162541     | 0                |
| rs3129704       | 3.07E-05 | 6          | -9          | N/A                              | -9               |
| rs2292714       | 3.11E-05 | 15         | 58465754    | AQP9;OTTHUMG000000132631         | 0                |
| rs11596541      | 3.25E-05 | 10         | 97317340    | OTTHUMG00000018812;SORBS1        | 0                |
| rs9374352       | 3.52E-05 | 6          | 112961006   | OTTHUMG00000015394;RP1-159M24.1  | -21924           |
| rs12488237      | 3.92E-05 | 3          | 56114861    | OTTHUMG000000158390;ERC2         | 0                |
| rs17694523      | 4.07E-05 | 19         | 34095594    | CTD-2329C7.1;OTTHUMG000000158155 | -15000           |
| rs9921786       | 4.31E-05 | 16         | 6163124     | AC012175.1                       | -352335          |
| rs7601413       | 4.96E-05 | 2          | 29032238    | OTTHUMG000000074041;SPDYA        | 0                |
| rs2277849       | 5.39E-05 | 15         | 84639350    | OTTHUMG000000147363;ADAMTSL3     | 0                |

|            |          |    |           |                                  |         |
|------------|----------|----|-----------|----------------------------------|---------|
| rs12148239 | 5.41E-05 | 15 | 84641018  | OTTHUMG00000147363;ADAMTSL3      | 0       |
| rs4888320  | 5.44E-05 | 16 | 74991864  | WDR59                            | 0       |
| rs10893859 | 5.56E-05 | 11 | 128236498 | ETS1                             | 92158   |
| rs3768666  | 5.59E-05 | 2  | 29005870  | OTTHUMG00000074041;SPDYA         | 0       |
| rs7104988  | 5.59E-05 | 11 | 128235452 | ETS1                             | 93204   |
| rs4733670  | 5.79E-05 | 8  | 128701530 | AC108925.1                       | 0       |
| rs1347970  | 5.88E-05 | 2  | 4915899   | AC092169.1                       | -41225  |
| rs11166179 | 6.01E-05 | 1  | 99571007  | RP5-896L10.1;OTTHUMG00000010766  | 0       |
| rs747606   | 6.13E-05 | 4  | 30669328  | RP11-495L18.2;OTTHUMG00000160368 | 51710   |
| rs17802299 | 6.27E-05 | 16 | 6161794   | AC012175.1                       | -351005 |
| rs10745892 | 6.52E-05 | 12 | 101105677 | AC010209.1                       | -56095  |
| rs1352008  | 6.55E-05 | 3  | 56142860  | OTTHUMG00000158390;ERC2          | 0       |
| rs10929104 | 6.58E-05 | 2  | 236100957 | OTTHUMG00000153146;AC114814.3    | 13408   |
| rs11254772 | 6.88E-05 | 10 | 6862716   | OTTHUMG00000017627;RP11-799O21.1 | 0       |
| rs1426640  | 7.06E-05 | 11 | 97185053  | AP005434.1                       | -343411 |
| rs3779673  | 7.22E-05 | 8  | 20032346  | SLC18A1;OTTHUMG00000097017       | 0       |
| rs12597709 | 7.40E-05 | 16 | 6162146   | AC012175.1                       | -351357 |
| rs7601934  | 7.46E-05 | 2  | 29032673  | OTTHUMG00000074041;SPDYA         | 0       |
| rs4733535  | 8.09E-05 | 8  | 128701496 | AC108925.1                       | 0       |
| rs3812287  | 8.23E-05 | 7  | 135105533 | CNOT4;OTTHUMG00000155568         | 0       |
| rs209753   | 8.37E-05 | 1  | 22821968  | ZBTB40;OTTHUMG00000002897        | 0       |
| rs7951075  | 8.45E-05 | 11 | 128239643 | ETS1                             | 89013   |
| rs16960170 | 8.51E-05 | 16 | 58505375  | NDRG4;OTTHUMG00000133485         | 0       |
| rs2414544  | 8.59E-05 | 15 | 58461006  | AQP9;OTTHUMG00000132631          | 0       |
| rs17821117 | 8.61E-05 | 15 | 58471626  | AQP9;OTTHUMG00000132631          | 0       |
| rs9565777  | 8.99E-05 | 13 | 83023638  | RP11-49F20.1;OTTHUMG00000017148  | -373628 |
| rs1421157  | 9.36E-05 | 3  | 177693796 | AC007953.1                       | 31664   |
| rs1771715  | 9.46E-05 | 9  | 110151668 | RP11-363D24.1;OTTHUMG00000020447 | 30897   |
| rs1350867  | 9.47E-05 | 3  | 28749473  | AC109586.1;OTTHUMG00000155718    | 0       |
| rs10505504 | 9.67E-05 | 8  | 128700344 | AC108925.1                       | 0       |
| rs6790581  | 0.0001   | 3  | 177703195 | AC007953.1                       | 22265   |
| rs11919255 | 0.0001   | 3  | 61894700  | PTPRG;OTTHUMG00000158660         | 0       |
| rs9856195  | 0.0001   | 3  | 157693601 | RP11-290K4.1;OTTHUMG00000158756  | 749     |
| rs10753652 | 0.0001   | 1  | 164919055 | OTTHUMG00000034480;RP11-403P14.1 | -28189  |
| rs234129   | 0.0001   | 14 | 98118378  | AL163872.1                       | 0       |
| rs2992443  | 0.0001   | 1  | 38961037  | OTTHUMG00000000481;RP11-329N22.1 | 18881   |
| rs896559   | 0.0001   | 12 | 42879126  | PRICKLE1                         | 0       |

|            |        |    |           |                                  |         |
|------------|--------|----|-----------|----------------------------------|---------|
| rs11802799 | 0.0001 | 1  | 164842442 | AL390119.2                       | 18873   |
| rs1335842  | 0.0001 | 13 | 83017730  | RP11-49F20.1;OTTHUMG00000017148  | -379536 |
| rs11485173 | 0.0001 | 1  | 222484745 | RP11-400N13.1;OTTHUMG00000037290 | 0       |
| rs820084   | 0.0001 | 6  | 35028791  | OTTHUMG00000014559;ANKS1A        | 0       |
| rs935893   | 0.0001 | 12 | 42876117  | PRICKLE1                         | 0       |
| rs1867131  | 0.0001 | 10 | 6863526   | OTTHUMG00000017627;RP11-799O21.1 | 0       |
| rs9290011  | 0.0001 | 3  | 157684647 | RP11-290K4.1;OTTHUMG00000158756  | 9703    |
| rs11679931 | 0.0001 | 2  | 4901970   | AC092169.1                       | -27296  |
| rs2416492  | 0.0001 | 5  | 117338365 | AC122716.1                       | 0       |
| rs4515270  | 0.0001 | 5  | 101180049 | OTTHUMG00000162751;RP11-560F8.1  | -27565  |
| rs2249785  | 0.0001 | 6  | 92751043  | RP11-173O8.1;OTTHUMG00000015223  | 26591   |
| rs7047988  | 0.0001 | 9  | 90227915  | DAPK1;OTTHUMG00000020150         | 0       |
| rs5754049  | 0.0001 | 22 | 32771017  | RP1-149A16.3;OTTHUMG00000058267  | -1634   |
| rs8182392  | 0.0001 | 18 | 35027184  | CELF4                            | 0       |
| rs1604856  | 0.0001 | 9  | 73909625  | TRPM3;OTTHUMG00000019997         | 0       |
| rs820089   | 0.0001 | 6  | 35024695  | OTTHUMG00000014559;ANKS1A        | 0       |
| rs2488912  | 0.0001 | 1  | 164864941 | OTTHUMG00000034480;RP11-403P14.1 | 25613   |
| rs17732598 | 0.0001 | 3  | 56232234  | OTTHUMG00000158390;ERC2          | 0       |
| rs9634739  | 0.0001 | 13 | 83008524  | RP11-49F20.1;OTTHUMG00000017148  | -388742 |
| rs12492055 | 0.0001 | 3  | 56239203  | OTTHUMG00000158390;ERC2          | 0       |
| rs9290008  | 0.0001 | 3  | 157639491 | AC055761.1                       | 8790    |
| rs2503651  | 0.0001 | 6  | 92770466  | RP11-173O8.1;OTTHUMG00000015223  | 46014   |
| rs2289025  | 0.0001 | 2  | 205969220 | PARD3B;OTTHUMG00000154562        | 0       |
| rs10166861 | 0.0001 | 2  | 29061111  | OTTHUMG00000074041;SPDYA         | 0       |
| rs10103726 | 0.0001 | 8  | 139183852 | OTTHUMG00000149864;FAM135B       | 0       |
| rs10936113 | 0.0001 | 3  | 157642180 | AC055761.1                       | 6101    |
| rs7095268  | 0.0001 | 10 | 6857559   | OTTHUMG00000017627;RP11-799O21.1 | 0       |
| rs2140420  | 0.0002 | 6  | 35064041  | OTTHUMG00000014559;ANKS1A        | 0       |
| rs2503658  | 0.0002 | 6  | 92762453  | RP11-173O8.1;OTTHUMG00000015223  | 38001   |
| rs11142786 | 0.0002 | 9  | 73907625  | TRPM3;OTTHUMG00000019997         | 0       |
| rs2503652  | 0.0002 | 6  | 92770284  | RP11-173O8.1;OTTHUMG00000015223  | 45832   |
| rs6542429  | 0.0002 | 2  | 118931233 | AC093901.1;OTTHUMG00000153418    | 0       |
| rs17021787 | 0.0002 | 3  | 28758306  | AC109586.1;OTTHUMG00000155718    | 0       |
| rs13025020 | 0.0002 | 2  | 118926955 | AC093901.1;OTTHUMG00000153418    | 0       |
| rs4766616  | 0.0002 | 12 | 110074860 | AC007623.2                       | 2263    |
| rs8001387  | 0.0002 | 13 | 83024688  | RP11-49F20.1;OTTHUMG00000017148  | -372578 |
| rs3094629  | 0.0002 | 6  | -9        | N/A                              | -9      |

|            |        |    |           |                                  |         |
|------------|--------|----|-----------|----------------------------------|---------|
| rs1533401  | 0.0002 | 3  | 157657630 | AC055761.1                       | -9116   |
| rs6502692  | 0.0002 | 17 | 3019725   | AC097370.1                       | 0       |
| rs12987450 | 0.0002 | 2  | 17344959  | AC096556.1                       | -40552  |
| rs9352352  | 0.0002 | 6  | 77282764  | OTTHUMG00000015064;RP11-35J1.1   | 0       |
| rs2452982  | 0.0002 | 6  | 92767828  | RP11-173O8.1;OTTHUMG00000015223  | 43376   |
| rs4790120  | 0.0002 | 17 | 3023867   | AC097370.1                       | 3116    |
| rs9860533  | 0.0002 | 3  | 157639592 | AC055761.1                       | 8689    |
| rs4300683  | 0.0002 | 17 | 2995572   | OTTHUMG00000090619;OR1D2         | 0       |
| rs1267001  | 0.0002 | 1  | 22802072  | ZBTB40;OTTHUMG00000002897        | 0       |
| rs3130404  | 0.0002 | 6  | -9        | N/A                              | -9      |
| rs1034017  | 0.0002 | 1  | 222490469 | RP11-400N13.1;OTTHUMG00000037290 | 0       |
| rs10224331 | 0.0002 | 7  | 153899183 | OTTHUMG00000151511;DPP6          | 0       |
| rs4733671  | 0.0002 | 8  | 128702019 | AC108925.1                       | 0       |
| rs4266612  | 0.0002 | 8  | 128707406 | AC108925.1                       | 0       |
| rs3895473  | 0.0002 | 9  | 4329209   | OTTHUMG00000019463;GLIS3         | 0       |
| rs2452984  | 0.0002 | 6  | 92768468  | RP11-173O8.1;OTTHUMG00000015223  | 44016   |
| rs694269   | 0.0002 | 18 | 65530609  | AC114689.1                       | 0       |
| rs3129705  | 0.0002 | 6  | -9        | N/A                              | -9      |
| rs10905018 | 0.0002 | 10 | 6859144   | OTTHUMG00000017627;RP11-799O21.1 | 0       |
| rs6716519  | 0.0002 | 2  | 16904254  | OTTHUMG00000151740;AC008069.1    | -5137   |
| rs2414539  | 0.0002 | 15 | 58453506  | AQP9;OTTHUMG00000132631          | 0       |
| rs4733665  | 0.0002 | 8  | 128694280 | AC108925.1                       | 4309    |
| rs935204   | 0.0002 | 15 | 58457632  | AQP9;OTTHUMG00000132631          | 0       |
| rs1748936  | 0.0002 | 14 | 96141240  | TCL6;OTTHUMG00000149979          | 0       |
| rs7836559  | 0.0002 | 8  | 84911232  | AC103816.1                       | -297006 |
| rs10504601 | 0.0002 | 8  | 76881491  | AC021842.1                       | -76352  |
| rs4962728  | 0.0002 | 10 | 126008980 | OAT;OTTHUMG00000019213           | 76896   |
| rs11629580 | 0.0002 | 15 | 33431375  | FMN1                             | 0       |
| rs3912498  | 0.0002 | 2  | 118941209 | AC093901.1;OTTHUMG00000153418    | 0       |
| rs1034020  | 0.0002 | 1  | 222490196 | RP11-400N13.1;OTTHUMG00000037290 | 0       |
| rs17147190 | 0.0002 | 5  | 120337628 | AC008565.1                       | -29253  |
| rs6542433  | 0.0002 | 2  | 118944740 | AC093901.1;OTTHUMG00000153418    | -778    |
| rs2210612  | 0.0002 | 1  | 242989157 | OTTHUMG00000039856;RSL24D1P4     | 52752   |
| rs6028485  | 0.0002 | 20 | 38158896  | AL031661.1                       | 177262  |
| rs6563813  | 0.0002 | 13 | 40858172  | AL356217.1                       | 57103   |
| rs936189   | 0.0003 | 3  | 150636224 | OTTHUMG00000159849;RP11-166N6.2  | 0       |
| rs10117146 | 0.0003 | 9  | 1639330   | AL358934.1                       | 305377  |

|            |        |    |           |                                  |        |
|------------|--------|----|-----------|----------------------------------|--------|
| rs8081958  | 0.0003 | 17 | 6370555   | PITPNM3;OTTHUMG00000102039       | 0      |
| rs1703315  | 0.0003 | 5  | 22393107  | CDH12;OTTHUMG00000090591         | 0      |
| rs11922170 | 0.0003 | 3  | 177667289 | OTTHUMG00000157253;RP11-2L8.1    | 11839  |
| rs7269159  | 0.0003 | 20 | 54125823  | RP5-1010E17.1;OTTHUMG00000032780 | 41071  |
| rs1513534  | 0.0003 | 4  | 60435755  | OTTHUMG00000161730;RP11-725D20.1 | 0      |
| rs8104526  | 0.0003 | 19 | 16879273  | NWD1                             | 0      |
| rs4130306  | 0.0003 | 6  | 10303160  | RP1-290I10.2;OTTHUMG00000014229  | 62697  |
| rs4733676  | 0.0003 | 8  | 128706719 | AC108925.1                       | 0      |
| rs10745891 | 0.0003 | 12 | 101104242 | AC010209.1                       | -54660 |
| rs6129346  | 0.0003 | 20 | 38128424  | AL031661.1                       | 146790 |
| rs1778792  | 0.0003 | 13 | 28443643  | AL390738.2                       | 0      |
| rs2503654  | 0.0003 | 6  | 92766359  | RP11-173O8.1;OTTHUMG00000015223  | 41907  |
| rs1390333  | 0.0003 | 1  | 222457286 | RP11-400N13.1;OTTHUMG00000037290 | 0      |
| rs4357254  | 0.0003 | 8  | 128707295 | AC108925.1                       | 0      |
| rs732289   | 0.0003 | 3  | 150636345 | OTTHUMG00000159849;RP11-166N6.2  | 0      |
| rs4141521  | 0.0003 | 5  | 30051189  | AC010374.1                       | 101952 |
| rs998402   | 0.0003 | 1  | 222491317 | RP11-400N13.1;OTTHUMG00000037290 | 0      |
| rs820076   | 0.0003 | 6  | 35033891  | OTTHUMG00000014559;ANKS1A        | 0      |
| rs3800426  | 0.0003 | 6  | 35009196  | OTTHUMG00000014559;ANKS1A        | 0      |
| rs2452965  | 0.0003 | 6  | 92770197  | RP11-173O8.1;OTTHUMG00000015223  | 45745  |
| rs6028457  | 0.0003 | 20 | 38118506  | AL031661.1                       | 136872 |
| rs773841   | 0.0003 | 19 | 16879706  | NWD1                             | 0      |
| rs6014412  | 0.0003 | 20 | 54126140  | RP5-1010E17.1;OTTHUMG00000032780 | 41388  |
| rs3094070  | 0.0003 | 6  | -9        | N/A                              | -9     |
| rs2055347  | 0.0003 | 12 | 130662745 | FZD10                            | 12461  |
| rs1726595  | 0.0003 | 7  | 18625532  | HDAC9;OTTHUMG00000152487         | 0      |
| rs34007251 | 0.0003 | 2  | 77206366  | LRRTM4;OTTHUMG00000152842        | 0      |
| rs12165004 | 0.0003 | 16 | 83576119  | CDH13                            | 0      |
| rs17460623 | 0.0003 | 13 | 44166019  | ENOX1;OTTHUMG00000016818         | 0      |
| rs10054030 | 0.0003 | 5  | 21570504  | OTTHUMG00000161915;RP11-823P9.1  | 25618  |
| rs11123476 | 0.0003 | 2  | 118927720 | AC093901.1;OTTHUMG00000153418    | 0      |
| rs16895132 | 0.0003 | 5  | 22401181  | CDH12;OTTHUMG00000090591         | 0      |
| rs7261265  | 0.0003 | 20 | 54125615  | RP5-1010E17.1;OTTHUMG00000032780 | 40863  |
| rs651185   | 0.0003 | 1  | 233871030 | KCNK1;OTTHUMG00000037923         | 62772  |
| rs252115   | 0.0003 | 5  | 141382472 | OTTHUMG00000129657;GNPDA1        | 0      |
| rs7398988  | 0.0003 | 12 | 131068134 | RIMBP2                           | -65724 |
| rs11010136 | 0.0003 | 10 | 19774177  | C10orf112;OTTHUMG00000017779     | 0      |

|            |        |    |           |                                  |        |
|------------|--------|----|-----------|----------------------------------|--------|
| rs12754103 | 0.0003 | 1  | 22847797  | ZBTB40;OTTHUMG00000002897        | 0      |
| rs12081567 | 0.0003 | 1  | 153200987 | OTTHUMG00000013937;RP1-140J1.4   | 2505   |
| rs7108678  | 0.0003 | 11 | 128205976 | ETS1                             | 122680 |
| rs6865763  | 0.0003 | 5  | 178239210 | AACSL                            | 0      |
| rs1769820  | 0.0003 | 1  | 22811523  | ZBTB40;OTTHUMG00000002897        | 0      |
| rs10874849 | 0.0003 | 1  | 94813431  | RP11-148B18.3;OTTHUMG00000010650 | 13027  |
| rs1824306  | 0.0003 | 2  | 71406569  | OTTHUMG00000153654;AC007881.4    | 666    |
| rs7249209  | 0.0003 | 19 | 44643273  | ZNF234                           | -2437  |
| rs12482086 | 0.0003 | 21 | 46384812  | C21orf70;OTTHUMG00000090293      | 0      |
| rs12497997 | 0.0003 | 3  | 180409397 | OTTHUMG00000157929;RP11-496B10.5 | 0      |
| rs252098   | 0.0003 | 5  | 141364109 | RNF14;OTTHUMG00000129660         | 0      |
| rs7726345  | 0.0003 | 5  | 132996604 | FSTL4;OTTHUMG00000162729         | -48349 |
| rs10998087 | 0.0003 | 10 | 53316743  | PRKG1;OTTHUMG00000018248         | 0      |
| rs12639731 | 0.0003 | 4  | 41679473  | LIMCH1;OTTHUMG00000160575        | 0      |
| rs3846987  | 0.0003 | 7  | 11665587  | OTTHUMG00000152346;THSD7A        | 0      |
| rs2450114  | 0.0003 | 8  | 117623719 | EIF3H                            | 33337  |
| rs11926232 | 0.0003 | 3  | 55936417  | OTTHUMG00000158390;ERC2          | 0      |
| rs2059775  | 0.0004 | 12 | 101116576 | AC010209.1                       | -66994 |
| rs3825300  | 0.0004 | 12 | 10242161  | CLEC1A                           | 0      |
| rs4678174  | 0.0004 | 3  | 122000871 | OTTHUMG00000159491;CASR          | 0      |
| rs4710948  | 0.0004 | 6  | 10305925  | RP1-290I10.2;OTTHUMG00000014229  | 59932  |
| rs2068818  | 0.0004 | 20 | 54127706  | RP5-1010E17.1;OTTHUMG00000032780 | 42954  |
| rs927216   | 0.0004 | 1  | 114828839 | RP4-543J13.1;OTTHUMG00000011899  | 23939  |
| rs10758524 | 0.0004 | 9  | 38761499  | AL591543.1                       | 81398  |
| rs943808   | 0.0004 | 10 | 130407679 | OTTHUMG00000019259;RP11-442O18.3 | 288087 |
| rs1488898  | 0.0004 | 3  | 176593662 | RP11-644C3.1;OTTHUMG00000157301  | -8036  |
| rs1558389  | 0.0004 | 15 | 97593989  | AC055873.1                       | 40503  |
| rs1687970  | 0.0004 | 1  | 94857931  | OTTHUMG00000010653;RP11-366L18.1 | 14024  |
| rs535288   | 0.0004 | 1  | 114833941 | RP4-543J13.1;OTTHUMG00000011899  | 29041  |
| rs17688313 | 0.0004 | 8  | 71683864  | AC020987.1                       | 9285   |
| rs3843335  | 0.0004 | 2  | 12212843  | OTTHUMG00000151709;AC096559.1    | 0      |
| rs6912295  | 0.0004 | 6  | 3716198   | AL033523.1                       | 0      |
| rs1008653  | 0.0004 | 20 | 38147213  | AL031661.1                       | 165579 |
| rs7535547  | 0.0004 | 1  | 94793878  | RP11-148B18.4;OTTHUMG00000010651 | -3753  |
| rs1077497  | 0.0004 | 10 | 126723133 | OTTHUMG00000019224;CTBP2         | 0      |
| rs704424   | 0.0004 | 3  | 64288463  | PRICKLE2;OTTHUMG00000158789      | -34808 |
| rs16902304 | 0.0004 | 8  | 128687634 | AC108925.1                       | 10955  |

|            |        |    |           |                                  |         |
|------------|--------|----|-----------|----------------------------------|---------|
| rs7427948  | 0.0004 | 3  | 61832829  | PTPRG;OTTHUMG00000158660         | 0       |
| rs10800059 | 0.0004 | 1  | 164906688 | OTTHUMG00000034480;RP11-403P14.1 | -15822  |
| rs938902   | 0.0004 | 16 | 12851898  | CPPED1                           | 0       |
| rs1155137  | 0.0004 | 17 | 38892460  | KRT25;OTTHUMG00000133373         | 11812   |
| rs4698426  | 0.0004 | 4  | 15922722  | FGFBP1;OTTHUMG00000097745        | 14470   |
| rs7017136  | 0.0004 | 8  | 54306826  | AC022034.1                       | 120905  |
| rs2011013  | 0.0004 | 15 | 84625766  | OTTHUMG00000147363;ADAMTSL3      | 0       |
| rs1765618  | 0.0004 | 1  | 94850575  | OTTHUMG00000010653;RP11-366L18.1 | 21380   |
| rs1813526  | 0.0004 | 16 | 79237510  | WWOX                             | 0       |
| rs7980801  | 0.0004 | 12 | 10233652  | CLEC1A                           | 0       |
| rs1748937  | 0.0004 | 14 | 96141595  | TCL6;OTTHUMG00000149979          | 0       |
| rs1518864  | 0.0004 | 3  | 180389056 | OTTHUMG00000157857;CCDC39        | 0       |
| rs41426852 | 0.0004 | 12 | 67044884  | GRIP1                            | 0       |
| rs12128109 | 0.0004 | 1  | 153212668 | OTTHUMG00000013937;RP1-140J1.4   | 14186   |
| rs1005546  | 0.0004 | 21 | 39068872  | OTTHUMG00000086667;KCNJ6         | 0       |
| rs11696824 | 0.0004 | 20 | 54126154  | RP5-1010E17.1;OTTHUMG00000032780 | 41402   |
| rs17531631 | 0.0004 | 2  | 201224637 | OTTHUMG00000154589;SPATS2L       | 0       |
| rs10732636 | 0.0004 | 1  | 114836936 | RP4-543J13.1;OTTHUMG00000011899  | 32036   |
| rs35768    | 0.0004 | 12 | 100585439 | ACTR6                            | -8426   |
| rs386368   | 0.0004 | 9  | 83616366  | RP11-289F5.1;OTTHUMG00000020080  | -130156 |
| rs9822541  | 0.0004 | 3  | 64342229  | OTTHUMG00000158710;RP11-14D22.2  | 87929   |
| rs1765635  | 0.0004 | 1  | 94847424  | OTTHUMG00000010653;RP11-366L18.1 | 24531   |
| rs11957757 | 0.0004 | 5  | 148216187 | ADRB2;OTTHUMG00000129933         | 7999    |
| rs9856144  | 0.0004 | 3  | 142972148 | OTTHUMG00000159373;SLC9A9        | 11916   |
| rs3807235  | 0.0004 | 7  | 154477378 | OTTHUMG00000151511;DPP6          | 0       |
| rs16836553 | 0.0004 | 1  | 164893737 | OTTHUMG00000034480;RP11-403P14.1 | -2871   |
| rs12674838 | 0.0005 | 8  | 71990280  | EYA1;OTTHUMG00000149894          | 119388  |
| rs10771544 | 0.0005 | 12 | 29650361  | OVCH1                            | 0       |
| rs7869423  | 0.0005 | 9  | 1634618   | AL358934.1                       | 300665  |
| rs1963858  | 0.0005 | 5  | 115789599 | CTB-118N6.3;OTTHUMG00000162986   | 0       |
| rs4913512  | 0.0005 | 12 | 67321354  | GRIP1                            | -248429 |
| rs7612518  | 0.0005 | 3  | 28756119  | AC109586.1;OTTHUMG00000155718    | 0       |
| rs17023546 | 0.0005 | 3  | 29493600  | OTTHUMG00000155699;RBMS3         | 0       |
| rs10936112 | 0.0005 | 3  | 157633907 | AC055761.1                       | 14374   |
| rs7861857  | 0.0005 | 9  | 38739117  | AL591543.1                       | 59016   |
| rs11254686 | 0.0005 | 10 | 6838942   | OTTHUMG00000017627;RP11-799O21.1 | 0       |
| rs17195220 | 0.0005 | 16 | 6182615   | AC012175.1                       | -371826 |

|            |        |    |           |                                  |         |
|------------|--------|----|-----------|----------------------------------|---------|
| rs1949542  | 0.0005 | 3  | 118183783 | RP11-384F7.1;OTTHUMG00000159346  | 0       |
| rs1566499  | 0.0005 | 4  | 169732171 | OTTHUMG00000161097;PALLD         | 0       |
| rs2115606  | 0.0005 | 2  | 57238715  | AC010738.1                       | 4481    |
| rs17577590 | 0.0005 | 5  | 177640394 | OTTHUMG00000130892;AGXT2L2       | 0       |
| rs13185812 | 0.0005 | 5  | 22363953  | CDH12;OTTHUMG00000090591         | 0       |
| rs418921   | 0.0005 | 5  | 141373949 | OTTHUMG00000129657;GNPDA1        | 0       |
| rs2948534  | 0.0005 | 17 | 25866550  | KSR1;OTTHUMG00000132051          | 0       |
| rs252114   | 0.0005 | 5  | 141382584 | OTTHUMG00000129657;GNPDA1        | 0       |
| rs226959   | 0.0005 | 6  | 3727811   | OTTHUMG00000014146;C6orf145      | 0       |
| rs7098330  | 0.0005 | 10 | 20383783  | PLXDC2;OTTHUMG00000017781        | 0       |
| rs945486   | 0.0005 | 10 | 120248090 | OTTHUMG00000019134;RP11-36N22.1  | -84293  |
| rs1360100  | 0.0005 | 1  | 153192214 | PRR9;OTTHUMG00000013936          | 421     |
| rs7642028  | 0.0005 | 3  | 157774287 | RP11-290K4.2;OTTHUMG00000158757  | 0       |
| rs11783715 | 0.0005 | 8  | 19989194  | SLC18A1;OTTHUMG00000097017       | 13172   |
| rs4241739  | 0.0005 | 4  | 182712956 | OTTHUMG00000160718;RP11-540E16.2 | 28216   |
| rs6488250  | 0.0005 | 12 | 10237014  | AC024224.1                       | 0       |
| rs962415   | 0.0005 | 12 | 67328072  | GRIP1                            | -255147 |
| rs4906122  | 0.0005 | 14 | 101937865 | AL049836.1                       | 80695   |
| rs2708070  | 0.0006 | 12 | 42878328  | PRICKLE1                         | 0       |
| rs1608107  | 0.0006 | 3  | 157774677 | RP11-290K4.2;OTTHUMG00000158757  | 0       |
| rs12958098 | 0.0006 | 18 | 20145379  | RP11-863N1.1;OTTHUMG00000158176  | -21049  |
| rs10774495 | 0.0006 | 12 | 119817571 | CCDC60                           | 0       |
| rs6086545  | 0.0006 | 20 | 915863    | OTTHUMG00000031652;ANGPT4        | -18903  |
| rs4074568  | 0.0006 | 7  | 153895189 | OTTHUMG00000151511;DPP6          | 0       |
| rs4377880  | 0.0006 | 7  | 102473163 | OTTHUMG00000157224;FBXL13        | 0       |
| rs7093588  | 0.0006 | 10 | 10042825  | OTTHUMG00000017655;RP5-933E2.1   | -57860  |
| rs2272955  | 0.0006 | 20 | -9        | N/A                              | -9      |
| rs6744712  | 0.0006 | 2  | 107798929 | AC006227.1;OTTHUMG00000153205    | 72218   |
| rs7749599  | 0.0006 | 6  | 5545654   | FARS2;OTTHUMG00000014178         | 0       |
| rs1323127  | 0.0006 | 1  | 175579354 | TNR;OTTHUMG00000034876           | 0       |
| rs7592895  | 0.0006 | 2  | 29100168  | TRMT61B;OTTHUMG00000128433       | -7001   |
| rs8102873  | 0.0006 | 19 | 57488423  | AC044792.1                       | 54635   |
| rs1000477  | 0.0006 | 9  | 103273769 | TMEFF1;OTTHUMG00000020367        | 0       |
| rs6807624  | 0.0006 | 3  | 60087390  | FHIT;OTTHUMG00000158591          | 0       |
| rs10788860 | 0.0006 | 1  | 153184789 | PRR9;OTTHUMG00000013936          | -5271   |
| rs12633820 | 0.0006 | 3  | 15494002  | COLQ;OTTHUMG00000156233          | 0       |
| rs9758090  | 0.0006 | 3  | 42203993  | OTTHUMG00000131795;TRAK1         | 0       |

|            |        |    |           |                                  |         |
|------------|--------|----|-----------|----------------------------------|---------|
| rs1535359  | 0.0006 | 6  | 14162229  | AL133259.1                       | 5475    |
| rs4906120  | 0.0006 | 14 | 101936521 | AL049836.1                       | 82039   |
| rs2822832  | 0.0006 | 21 | 16054693  | OTTHUMG00000074315;AF165138.7    | -23551  |
| rs9261700  | 0.0006 | 6  | -9        | N/A                              | -9      |
| rs1381967  | 0.0006 | 5  | 101438906 | AC126916.1                       | 27805   |
| rs6488258  | 0.0006 | 12 | 10252208  | CLEC1A                           | -624    |
| rs6490253  | 0.0006 | 12 | 119832798 | AC084881.2                       | 0       |
| rs2779613  | 0.0006 | 9  | 83664259  | RP11-289F5.1;OTTHUMG00000020080  | -178049 |
| rs4359399  | 0.0006 | 15 | 84645052  | OTTHUMG00000147363;ADAMTSL3      | 0       |
| rs10971024 | 0.0006 | 9  | 32561704  | OTTHUMG00000019741;NDUFB6        | 0       |
| rs365630   | 0.0006 | 6  | 24967115  | RP11-367G6.1;OTTHUMG00000014377  | -9490   |
| rs7539107  | 0.0006 | 1  | 237595655 | RYSR2;OTTHUMG00000039543         | 0       |
| rs669260   | 0.0006 | 9  | 32503440  | DDX58;OTTHUMG00000019746         | 0       |
| rs4974159  | 0.0006 | 3  | 56025951  | OTTHUMG00000158390;ERC2          | 0       |
| rs7972187  | 0.0006 | 12 | 10244654  | CLEC1A                           | 0       |
| rs4302392  | 0.0006 | 3  | 85689076  | CADM2;OTTHUMG00000158990         | 0       |
| rs4974196  | 0.0006 | 3  | 56357553  | OTTHUMG00000158390;ERC2          | 0       |
| rs1928556  | 0.0006 | 12 | 41173766  | CNTN1                            | -128390 |
| rs7318517  | 0.0006 | 13 | 40857430  | AL356217.1                       | 56361   |
| rs7785072  | 0.0006 | 7  | 29137502  | CPVL;OTTHUMG00000023669          | 0       |
| rs9581776  | 0.0006 | 13 | 27472564  | OTTHUMG00000016622;RP11-545M8.1  | -6935   |
| rs2446148  | 0.0006 | 19 | 16900878  | NWD1                             | 0       |
| rs1999246  | 0.0006 | 13 | 61937412  | PCDH20;OTTHUMG00000017012        | 46409   |
| rs673782   | 0.0006 | 6  | 24964002  | RP11-367G6.1;OTTHUMG00000014377  | -12603  |
| rs686943   | 0.0006 | 6  | 158169830 | AL133510.1                       | -36708  |
| rs17160305 | 0.0007 | 1  | 146981725 | RP11-441L11.1;OTTHUMG00000041476 | 4433    |
| rs10932880 | 0.0007 | 2  | 221540944 | OTTHUMG00000153857;AC067956.1    | 0       |
| rs2585784  | 0.0007 | 11 | 19876929  | NAV2;OTTHUMG00000151837          | 0       |
| rs10886361 | 0.0007 | 10 | 120764967 | AL157788.1                       | -335    |
| rs9833895  | 0.0007 | 3  | 55392962  | RP11-875H7.2;OTTHUMG00000158358  | 1509    |
| rs409037   | 0.0007 | 5  | 141374203 | OTTHUMG00000129657;GNPDA1        | 0       |
| rs17580275 | 0.0007 | 4  | 38195371  | AC098680.2                       | -44863  |
| rs11123589 | 0.0007 | 2  | 4913966   | AC092169.1                       | -39292  |
| rs2070664  | 0.0007 | 15 | 35085201  | ACTC1;OTTHUMG00000129675         | 0       |
| rs17447186 | 0.0007 | 2  | 201212791 | OTTHUMG00000154589;SPATS2L       | 0       |
| rs6438766  | 0.0007 | 3  | 122521576 | OTTHUMG00000159553;DIRC2         | 0       |
| rs2892347  | 0.0007 | 10 | 6838849   | OTTHUMG00000017627;RP11-799O21.1 | 0       |

|            |        |    |           |                                   |         |
|------------|--------|----|-----------|-----------------------------------|---------|
| rs17551939 | 0.0007 | 2  | 12268748  | OTTHUMG00000151709;AC096559.1     | 0       |
| rs10973987 | 0.0007 | 9  | 38706453  | AL591543.1                        | 26352   |
| rs17260548 | 0.0007 | 18 | 23056425  | ZNF521                            | -124211 |
| rs17093250 | 0.0007 | 12 | 43777335  | ADAMTS20                          | 0       |
| rs10177436 | 0.0007 | 2  | 4925630   | AC092169.1                        | -50956  |
| rs10826319 | 0.0007 | 10 | 61333139  | RP11-135D11.2;OTTHUMG00000018280  | -15769  |
| rs11775313 | 0.0007 | 8  | 24709967  | NEFM;OTTHUMG00000131990           | -60558  |
| rs10191141 | 0.0007 | 2  | 77103474  | LRRTM4;OTTHUMG00000152842         | 0       |
| rs267398   | 0.0007 | 5  | 174958276 | OTTHUMG00000130555;SFXN1          | 1531    |
| rs4816578  | 0.0007 | 21 | 39045705  | OTTHUMG00000086667;KCNJ6          | 0       |
| rs9304851  | 0.0007 | 19 | 34161998  | CHST8                             | 0       |
| rs10868918 | 0.0007 | 9  | 73474330  | TRPM3;OTTHUMG00000019997          | 0       |
| rs2403375  | 0.0007 | 11 | 11027552  | AC069360.2                        | -106728 |
| rs11260640 | 0.0007 | 1  | 5596696   | OTTHUMG00000041453;RP11-154H17.1  | 50732   |
| rs12131857 | 0.0007 | 1  | 188671055 | RP11-316I3.1;OTTHUMG00000035544   | 3699    |
| rs12510685 | 0.0007 | 4  | 137992764 | RP11-138I17.1;OTTHUMG00000161243  | 0       |
| rs10084110 | 0.0007 | 19 | 21821537  | AC092364.2                        | 0       |
| rs432006   | 0.0007 | 6  | 24972903  | RP11-367G6.1;OTTHUMG00000014377   | -3702   |
| rs17175465 | 0.0007 | 14 | 70564804  | SLC8A3;OTTHUMG00000152342         | 0       |
| rs7602114  | 0.0007 | 2  | 4924044   | AC092169.1                        | -49370  |
| rs2321321  | 0.0007 | 17 | 10899108  | AC005284.1                        | -57997  |
| rs6101568  | 0.0007 | 20 | 38106130  | AL031661.1                        | 124496  |
| rs2283414  | 0.0007 | 14 | 72658989  | RGS6                              | 0       |
| rs3099025  | 0.0007 | 5  | 22409636  | CDH12;OTTHUMG00000090591          | 0       |
| rs7601474  | 0.0007 | 2  | 59588656  | AC007131.2;OTTHUMG00000152614     | 0       |
| rs4511115  | 0.0007 | 1  | 222513180 | RP11-400N13.1;OTTHUMG00000037290  | 0       |
| rs469999   | 0.0007 | 22 | 48637056  | LL22NC03-121E8.3;OTTHUMG000001503 | 98010   |
| rs267397   | 0.0007 | 5  | 174958552 | OTTHUMG00000130555;SFXN1          | 1807    |
| rs11181941 | 0.0007 | 12 | 43616858  | AC079603.1                        | 68440   |
| rs17111175 | 0.0007 | 14 | 26856674  | NOVA1;OTTHUMG00000029385          | 58415   |
| rs198037   | 0.0007 | 5  | 174958345 | OTTHUMG00000130555;SFXN1          | 1600    |
| rs1498721  | 0.0007 | 3  | 134170056 | OTTHUMG00000159770;RP11-375I20.3  | 13003   |
| rs12810016 | 0.0007 | 12 | 83308363  | TMTC2                             | 0       |
| rs1323224  | 0.0007 | 9  | 1636435   | AL358934.1                        | 302482  |
| rs10848147 | 0.0007 | 12 | 131054220 | RIMBP2                            | -51810  |
| rs2676069  | 0.0007 | 15 | 33690463  | RYR3                              | 0       |
| rs16951490 | 0.0007 | 18 | 47612538  | MYO5B                             | 0       |

|            |        |    |           |                                  |         |
|------------|--------|----|-----------|----------------------------------|---------|
| rs2154009  | 0.0007 | 1  | 164902766 | OTTHUMG00000034480;RP11-403P14.1 | -11900  |
| rs4663552  | 0.0007 | 2  | 236100615 | OTTHUMG00000153146;AC114814.3    | 13066   |
| rs7773356  | 0.0007 | 6  | 6398523   | RP3-398D13.3;OTTHUMG00000014192  | 0       |
| rs17406009 | 0.0007 | 2  | 77222301  | OTTHUMG00000152840;AC079117.1    | 0       |
| rs12634346 | 0.0007 | 3  | 15500295  | COLQ;OTTHUMG00000156233          | 0       |
| rs721486   | 0.0008 | 11 | 117557540 | DSCAML1                          | 0       |
| rs6659261  | 0.0008 | 1  | 184447469 | OTTHUMG00000035386;C1orf21       | 0       |
| rs12899929 | 0.0008 | 15 | 58443430  | AQP9;OTTHUMG00000132631          | 0       |
| rs17249740 | 0.0008 | 17 | 71765414  | C17orf54                         | 0       |
| rs6975541  | 0.0008 | 7  | 126512020 | OTTHUMG00000022888;GRM8          | 0       |
| rs926105   | 0.0008 | 8  | 24720502  | NEFM;OTTHUMG00000131990          | -50023  |
| rs1204516  | 0.0008 | 7  | 126503252 | OTTHUMG00000022888;GRM8          | 0       |
| rs10918091 | 0.0008 | 1  | 164885666 | OTTHUMG00000034480;RP11-403P14.1 | 4888    |
| rs1669925  | 0.0008 | 12 | 42886217  | PRICKLE1                         | 0       |
| rs7161011  | 0.0008 | 14 | 72660476  | RGS6                             | 0       |
| rs9973270  | 0.0008 | 19 | 21814919  | AC092364.2                       | 0       |
| rs9471457  | 0.0008 | 6  | 40952395  | OTTHUMG00000014665;UNC5CL        | 42377   |
| rs1286920  | 0.0008 | 14 | 90539659  | KCNK13                           | 0       |
| rs3130112  | 0.0008 | 6  | -9        | N/A                              | -9      |
| rs1318840  | 0.0008 | 3  | 122548182 | OTTHUMG00000159553;DIRC2         | 0       |
| rs12675271 | 0.0008 | 8  | 71602009  | XKR9                             | 0       |
| rs9635927  | 0.0008 | 18 | 33878994  | FHOD3                            | 0       |
| rs2080320  | 0.0008 | 2  | 202379173 | ALS2CR11;OTTHUMG00000132830      | 0       |
| rs16851294 | 0.0008 | 3  | 140997752 | OTTHUMG00000160171;ACPL2         | 0       |
| rs4610179  | 0.0008 | 3  | 144905101 | RP11-622L21.1;OTTHUMG00000159390 | -336224 |
| rs16928390 | 0.0008 | 11 | 36114157  | LDLRAD3                          | 0       |
| rs273078   | 0.0008 | 5  | 174955584 | OTTHUMG00000130555;SFXN1         | 0       |
| rs10107837 | 0.0008 | 8  | 19988676  | SLC18A1;OTTHUMG00000097017       | 13690   |
| rs2255897  | 0.0008 | 3  | 15520677  | COLQ;OTTHUMG00000156233          | 0       |
| rs599195   | 0.0008 | 20 | 48464795  | SLC9A8;OTTHUMG00000032710        | 0       |
| rs4945729  | 0.0008 | 6  | 106254673 | AL596112.1                       | -97575  |
| rs3754798  | 0.0008 | 2  | 201239957 | OTTHUMG00000154589;SPATS2L       | 0       |
| rs6436972  | 0.0008 | 2  | 231638629 | OTTHUMG00000133220;CAB39         | 0       |
| rs6584352  | 0.0008 | 10 | 83603317  | NRG3;OTTHUMG00000018626          | -31489  |
| rs1687662  | 0.0008 | 16 | 86413918  | AC092327.1                       | -34633  |
| rs7620149  | 0.0008 | 3  | 15500896  | COLQ;OTTHUMG00000156233          | 0       |
| rs17160264 | 0.0008 | 1  | 146969712 | RP11-441L11.1;OTTHUMG00000041476 | 16446   |

|            |        |    |           |                                    |         |
|------------|--------|----|-----------|------------------------------------|---------|
| rs1847041  | 0.0008 | 5  | 81934682  | CTD-2015A6.2;OTTHUMG000000162768   | -51452  |
| rs2898264  | 0.0008 | 8  | 11016516  | OTTHUMG000000129351;XKR6           | 0       |
| rs8077539  | 0.0008 | 17 | 4749936   | MINK1                              | 0       |
| rs164494   | 0.0008 | 5  | 141354116 | RNF14;OTTHUMG000000129660          | 0       |
| rs1048866  | 0.0008 | 1  | 94638711  | ARHGAP29;OTTHUMG000000010643       | 0       |
| rs2167617  | 0.0008 | 3  | 56288321  | OTTHUMG000000158390;ERC2           | 0       |
| rs11073733 | 0.0008 | 15 | 88300234  | OTTHUMG000000148677;NTRK3          | 102748  |
| rs587531   | 0.0009 | 1  | 233878427 | KCNK1;OTTHUMG000000037923          | 70169   |
| rs2736994  | 0.0009 | 4  | 90784528  | OTTHUMG000000130947;MMRN1          | -16155  |
| rs614281   | 0.0009 | 2  | 45866456  | OTTHUMG000000128817;PRKCE          | -12028  |
| rs1811442  | 0.0009 | 4  | 90747751  | SNCA;OTTHUMG000000130948           | 0       |
| rs6823449  | 0.0009 | 4  | 119499721 | CEP170L;OTTHUMG000000132958        | 22442   |
| rs7108306  | 0.0009 | 11 | 134758036 | AP001999.1                         | 124332  |
| rs3094623  | 0.0009 | 6  | -9        | N/A                                | -9      |
| rs10233490 | 0.0009 | 7  | 153901907 | OTTHUMG000000151511;DPP6           | 0       |
| rs17289655 | 0.0009 | 9  | 32486507  | DDX58;OTTHUMG000000019746          | 0       |
| rs13018470 | 0.0009 | 2  | 59694749  | AC007131.2;OTTHUMG000000152614     | 0       |
| rs929820   | 0.0009 | 5  | 58393332  | PDE4D;OTTHUMG000000162218          | 0       |
| rs9807015  | 0.0009 | 17 | 49435657  | OTTHUMG000000162374;RP11-1018N14.2 | 15725   |
| rs3094045  | 0.0009 | 6  | -9        | N/A                                | -9      |
| rs2828686  | 0.0009 | 21 | 25371178  | AP000477.2;OTTHUMG000000078275     | -31590  |
| rs1728390  | 0.0009 | 16 | 86414059  | AC092327.1                         | -34774  |
| rs331101   | 0.0009 | 2  | 150843072 | AC007364.1;OTTHUMG000000153746     | -127367 |
| rs6886088  | 0.0009 | 5  | 152460791 | AC091969.1;OTTHUMG000000163486     | 0       |
| rs2662697  | 0.0009 | 4  | 121266964 | RP11-679C8.2;OTTHUMG000000161124   | 0       |
| rs16970654 | 0.0009 | 17 | 75912171  | AC015804.1                         | -4009   |
| rs17406084 | 0.0009 | 2  | 77226406  | OTTHUMG000000152840;AC079117.1     | 0       |
| rs6722889  | 0.0009 | 2  | 202304082 | OTTHUMG000000132822;TRAK2          | 0       |
| rs17427572 | 0.0009 | 1  | 22287866  | OTTHUMG000000002758;CELA3B         | -15648  |
| rs761570   | 0.0009 | 20 | 912626    | OTTHUMG000000031652;ANGPT4         | -15666  |
| rs597582   | 0.0009 | 19 | 7619239   | PNPLA6                             | 0       |
| rs7969125  | 0.0009 | 12 | 10244716  | CLEC1A                             | 0       |
| rs1411701  | 0.0009 | 1  | 94635028  | ARHGAP29;OTTHUMG000000010643       | 2279    |
| rs10998872 | 0.0009 | 10 | 71351750  | OTTHUMG000000018387;RP11-343J3.5   | 0       |
| rs1193320  | 0.0009 | 8  | 19073549  | RP11-618M23.1;OTTHUMG000000160400  | -21698  |
| rs11940866 | 0.0009 | 4  | 127105857 | RP11-318I4.2;OTTHUMG000000161148   | -77779  |
| rs970269   | 0.0009 | 6  | -9        | N/A                                | -9      |

|            |        |    |           |                                  |         |
|------------|--------|----|-----------|----------------------------------|---------|
| rs12467212 | 0.0009 | 2  | 187264986 | OTTHUMG00000154254;AC017071.1    | 35131   |
| rs1929886  | 0.0009 | 9  | 81336260  | AL592047.5                       | -20055  |
| rs7753048  | 0.0009 | 6  | 132217687 | ENPP1;OTTHUMG00000015572         | 1392    |
| rs7774296  | 0.0009 | 6  | 6391152   | RP3-398D13.3;OTTHUMG00000014192  | 0       |
| rs848374   | 0.0009 | 7  | 108534194 | OTTHUMG00000154867;C7orf66       | -9550   |
| rs10508312 | 0.0009 | 10 | 6814474   | OTTHUMG00000017627;RP11-799O21.1 | -7086   |
| rs1909643  | 0.0009 | 10 | 61329938  | OTTHUMG00000018281;RP11-135D11.3 | -18302  |
| rs4572283  | 0.0009 | 13 | 43188559  | TNFSF11;OTTHUMG00000016807       | 6410    |
| rs4707889  | 0.0009 | 6  | 68847507  | RP11-542F9.1;OTTHUMG00000014978  | 77113   |
| rs4871930  | 0.0009 | 8  | 24691440  | NEFM;OTTHUMG00000131990          | -79085  |
| rs10998031 | 0.0009 | 10 | 53303397  | PRKG1;OTTHUMG00000018248         | 0       |
| rs2292382  | 0.0009 | 18 | 47624937  | MYO5B                            | 0       |
| rs2910642  | 0.001  | 5  | 58396111  | PDE4D;OTTHUMG00000162218         | 0       |
| rs8045545  | 0.001  | 16 | 56730361  | MT1A                             | 0       |
| rs3855819  | 0.001  | 4  | 111727163 | RP11-777N19.1;OTTHUMG00000161115 | 8663    |
| rs4812831  | 0.001  | 20 | 43018260  | RP5-881L22.4;OTTHUMG00000032525  | 0       |
| rs17095472 | 0.001  | 14 | 27949721  | OTTHUMG00000157680;CTD-3006G17.1 | -221349 |
| rs10510825 | 0.001  | 3  | 60089314  | FHIT;OTTHUMG00000158591          | 0       |
| rs1356672  | 0.001  | 4  | 186935372 | AC104070.1                       | 12238   |
| rs7906222  | 0.001  | 10 | 61330485  | RP11-135D11.2;OTTHUMG00000018280 | -18423  |
| rs2835885  | 0.001  | 21 | 39039566  | OTTHUMG00000086667;KCNJ6         | 0       |
| rs4810269  | 0.001  | 20 | 38142828  | AL031661.1                       | 161194  |
| rs2732091  | 0.001  | 8  | 71918423  | EYA1;OTTHUMG00000149894          | 191245  |
| rs12924838 | 0.001  | 16 | 6197835   | AC012175.1                       | -387046 |
| rs477874   | 0.001  | 10 | 120311534 | OTTHUMG00000019134;RP11-36N22.1  | -20849  |
| rs9859077  | 0.001  | 3  | 101136402 | OTTHUMG00000149927;SENP7         | 0       |
| rs13092264 | 0.001  | 3  | 15514297  | COLQ;OTTHUMG00000156233          | 0       |
| rs11033414 | 0.001  | 11 | 36114950  | LDLRAD3                          | 0       |
| rs1002508  | 0.001  | 12 | 130752632 | AC026764.1                       | 47520   |
| rs10497857 | 0.001  | 2  | 201237345 | OTTHUMG00000154589;SPATS2L       | 0       |
| rs17217280 | 0.001  | 9  | 32480251  | DDX58;OTTHUMG00000019746         | 0       |
| rs17105569 | 0.001  | 1  | 81338600  | AC091613.1                       | 68052   |
| rs2146199  | 0.001  | 1  | 168982863 | RP11-375F2.2;OTTHUMG00000034588  | 0       |
| rs1434160  | 0.001  | 2  | 205987805 | PARD3B;OTTHUMG00000154562        | 0       |
| rs4362677  | 0.001  | 3  | 157667357 | AC055761.1                       | -18843  |
| rs12648827 | 0.001  | 4  | 115497587 | UGT8;OTTHUMG00000132915          | -22024  |
| rs1205032  | 0.001  | 6  | 3485134   | AL160398.1                       | 24102   |

|            |        |    |           |                                    |         |
|------------|--------|----|-----------|------------------------------------|---------|
| rs1205038  | 0.001  | 6  | 3485964   | AL160398.1                         | 24932   |
| rs3132671  | 0.001  | 6  | -9        | N/A                                | -9      |
| rs4764437  | 0.001  | 12 | 19092190  | RP11-282K24.1;OTTHUMG000000157497  | -149895 |
| rs41457949 | 0.001  | 17 | 46123983  | NFE2L1                             | -1703   |
| rs17131127 | 0.001  | 1  | 91135628  | AC092805.1                         | 12108   |
| rs12498177 | 0.001  | 4  | 15914801  | FGFBP1;OTTHUMG000000097745         | 22391   |
| rs10770516 | 0.001  | 12 | 19818502  | AC090059.1                         | -58867  |
| rs1536792  | 0.001  | 9  | 12972382  | RP11-382H24.3;OTTHUMG000000019559  | 460     |
| rs1853601  | 0.001  | 9  | 83506301  | RP11-289F5.1;OTTHUMG000000020080   | -20091  |
| rs10848493 | 0.001  | 12 | 1598223   | ERC1;OTTHUMG000000130138           | 0       |
| rs4780082  | 0.001  | 15 | 33415482  | FMN1                               | 0       |
| rs7187986  | 0.001  | 16 | 6180806   | AC012175.1                         | -370017 |
| rs2245220  | 0.001  | 20 | 4705718   | PRND;OTTHUMG000000031789           | 0       |
| rs2244438  | 0.001  | 2  | 202252539 | OTTHUMG000000132822;TRAK2          | 0       |
| rs2026718  | 0.001  | 9  | 12964715  | RP11-382H24.3;OTTHUMG000000019559  | 8127    |
| rs1954664  | 0.001  | 14 | 27955256  | OTTHUMG000000157680;CTD-3006G17.1  | -226884 |
| rs4780972  | 0.001  | 16 | 10757882  | OTTHUMG000000129750;TEKT5          | 0       |
| rs4783689  | 0.001  | 16 | 68853671  | CDH1;CADH1;OTTHUMG000000137561     | 0       |
| rs17551841 | 0.001  | 2  | 12266365  | OTTHUMG000000151709;AC096559.1     | 0       |
| rs1205036  | 0.001  | 6  | 3485486   | AL160398.1                         | 24454   |
| rs4726388  | 0.001  | 7  | 153917016 | OTTHUMG000000151511;DPP6           | 0       |
| rs10867258 | 0.001  | 9  | 81370463  | AL592047.4                         | -12035  |
| rs6517645  | 0.001  | 21 | 42382478  | C21orf130;OTTHUMG000000086741      | 130949  |
| rs10864997 | 0.0011 | 2  | 4863214   | AC092169.1                         | 11377   |
| rs7810507  | 0.0011 | 7  | 130437476 | OTTHUMG000000155002;KLF14          | -18616  |
| rs10512079 | 0.0011 | 9  | 81372519  | AL592047.4                         | -14091  |
| rs7905945  | 0.0011 | 10 | 61330297  | RP11-135D11.2;OTTHUMG000000018280  | -18611  |
| rs1774644  | 0.0011 | 10 | 112115666 | OTTHUMG000000019036;SMNDC1         | -50957  |
| rs4843599  | 0.0011 | 16 | 87383709  | FBXO31                             | 0       |
| rs4791449  | 0.0011 | 17 | 10939187  | AC005284.1                         | -17918  |
| rs2129663  | 0.0011 | 12 | 131088522 | RIMBP2                             | -86112  |
| rs4799450  | 0.0011 | 18 | 35028901  | CELF4                              | 0       |
| rs952299   | 0.0011 | 4  | 12725653  | AC096750.1                         | 73052   |
| rs11099756 | 0.0011 | 4  | 151063917 | DCLK2;OTTHUMG000000161444          | 0       |
| rs2272225  | 0.0011 | 7  | 96309021  | OTTHUMG000000150680;SHFM1          | 0       |
| rs13302370 | 0.0011 | 9  | 31191671  | RP11-572H4.1;OTTHUMG000000019734   | -24693  |
| rs8074198  | 0.0011 | 17 | 49421483  | OTTHUMG000000162374;RP11-1018N14.2 | 1551    |

|            |        |    |           |                                  |         |
|------------|--------|----|-----------|----------------------------------|---------|
| rs2895332  | 0.0011 | 22 | 17591089  | IL17RA;OTTHUMG00000150026        | 0       |
| rs10176493 | 0.0011 | 2  | 22558959  | OTTHUMG00000151808;AC068490.2    | 0       |
| rs895882   | 0.0011 | 2  | 200303015 | OTTHUMG00000132767;SATB2         | 0       |
| rs7645977  | 0.0011 | 3  | 177694171 | AC007953.1                       | 31289   |
| rs9791179  | 0.0011 | 6  | 106254835 | AL596112.1                       | -97413  |
| rs3807737  | 0.0011 | 7  | 77729487  | MAGI2                            | 0       |
| rs2732102  | 0.0011 | 8  | 71922872  | EYA1;OTTHUMG00000149894          | 186796  |
| rs2777683  | 0.0011 | 9  | 83675513  | RP11-289F5.1;OTTHUMG00000020080  | -189303 |
| rs17149329 | 0.0011 | 11 | 86424719  | ME3                              | -41191  |
| rs11615787 | 0.0011 | 12 | 41190833  | CNTN1                            | -111323 |
| rs1541243  | 0.0011 | 1  | 164875964 | OTTHUMG00000034480;RP11-403P14.1 | 14590   |
| rs3129819  | 0.0011 | 6  | -9        | N/A                              | -9      |
| rs848385   | 0.0011 | 7  | 108531984 | OTTHUMG00000154867;C7orf66       | -7340   |
| rs9301098  | 0.0011 | 13 | 106682612 | AL603632.1                       | -98108  |
| rs3746674  | 0.0011 | 20 | 4764629   | RASSF2;OTTHUMG00000031790        | 0       |
| rs1837891  | 0.0011 | 4  | 90736131  | SNCA;OTTHUMG00000130948          | 0       |
| rs335359   | 0.0011 | 6  | 155650887 | TFB1M;OTTHUMG00000015881         | -15260  |
| rs8110889  | 0.0011 | 19 | 34177770  | CHST8                            | 0       |
| rs7550217  | 0.0011 | 1  | 100109949 | PALMD;OTTHUMG00000010764         | -1550   |
| rs13403118 | 0.0011 | 2  | 187079250 | OTTHUMG00000154255;AC093038.1    | 46900   |
| rs2452952  | 0.0011 | 6  | 92796236  | AL590814.1                       | -33004  |
| rs11621971 | 0.0011 | 14 | 51124527  | SAV1;OTTHUMG00000140293          | 0       |
| rs9948984  | 0.0011 | 18 | 35027696  | CELF4                            | 0       |
| rs10497836 | 0.0011 | 2  | 200288718 | OTTHUMG00000132767;SATB2         | 0       |
| rs7718943  | 0.0011 | 5  | 174921431 | OTTHUMG00000130555;SFXN1         | 0       |
| rs1501409  | 0.0011 | 7  | 121862247 | RP11-560I19.1;OTTHUMG00000157098 | 3756    |
| rs17538775 | 0.0011 | 12 | 32732329  | OTTHUMG00000137374;FGD4          | 0       |
| rs1079988  | 0.0012 | 1  | 14367959  | C1orf196;OTTHUMG00000008026      | 0       |
| rs1421049  | 0.0012 | 10 | 113754347 | GPAM;OTTHUMG00000019055          | 155277  |
| rs6574950  | 0.0012 | 14 | 26873452  | NOVA1;OTTHUMG00000029385         | 41637   |
| rs2283418  | 0.0012 | 14 | 72579936  | RGS6                             | 0       |
| rs721390   | 0.0012 | 2  | 77094790  | LRRTM4;OTTHUMG00000152842        | 0       |
| rs473945   | 0.0012 | 9  | 12840928  | C9orf150;OTTHUMG00000019557      | 18798   |
| rs10867246 | 0.0012 | 9  | 81352266  | AL592047.5                       | -4049   |
| rs1450360  | 0.0012 | 16 | 60389893  | AC018554.1                       | 2466    |
| rs6101547  | 0.0012 | 20 | 38074295  | AL031661.1                       | 92661   |
| rs2835906  | 0.0012 | 21 | 39082804  | OTTHUMG00000086667;KCNJ6         | 0       |

|            |        |    |           |                                  |        |
|------------|--------|----|-----------|----------------------------------|--------|
| rs6763000  | 0.0012 | 3  | 136761687 | OTTHUMG00000159779;IL20RB        | 31760  |
| rs1963008  | 0.0012 | 4  | 177015194 | OTTHUMG00000160791;WDR17         | 0      |
| rs2066119  | 0.0012 | 9  | 1635747   | AL358934.1                       | 301794 |
| rs7031588  | 0.0012 | 9  | 101822302 | COL15A1;OTTHUMG00000020351       | 0      |
| rs11222220 | 0.0012 | 11 | 130488342 | OTTHUMG00000150705;C11orf44      | -54509 |
| rs6657363  | 0.0012 | 1  | 14370245  | C1orf196;OTTHUMG00000008026      | 0      |
| rs1437934  | 0.0012 | 2  | 150765489 | AC007364.1;OTTHUMG00000153746    | -49784 |
| rs9815195  | 0.0012 | 3  | 1301130   | OTTHUMG00000119030;CNTN6         | 0      |
| rs12654005 | 0.0012 | 5  | 58370838  | PDE4D;OTTHUMG00000162218         | 0      |
| rs7022784  | 0.0012 | 9  | 36147128  | GLIPR2;OTTHUMG00000019900        | 0      |
| rs9533567  | 0.0012 | 13 | 44225066  | ENOX1;OTTHUMG00000016818         | 0      |
| rs6129320  | 0.0012 | 20 | 38073236  | AL031661.1                       | 91602  |
| rs34426652 | 0.0012 | 4  | 2335396   | OTTHUMG00000160292;ZFYVE28       | 0      |
| rs2130928  | 0.0012 | 4  | 23712946  | OTTHUMG00000160278;RP11-380P13.1 | 0      |
| rs984800   | 0.0012 | 5  | 62367195  | AC113420.1                       | -12037 |
| rs2555275  | 0.0012 | 12 | 119587953 | SRRM4                            | 0      |
| rs6511018  | 0.0012 | 19 | 19186705  | SLC25A42                         | 0      |
| rs13115084 | 0.0012 | 4  | 4546923   | OTTHUMG00000159923;RP11-323F5.2  | 0      |
| rs848386   | 0.0012 | 7  | 108531829 | OTTHUMG00000154867;C7orf66       | -7185  |
| rs10984378 | 0.0012 | 9  | 121803888 | DBC1;OTTHUMG00000021020          | 111848 |
| rs9951547  | 0.0012 | 18 | 63106238  | AC114688.1                       | -36511 |
| rs6775133  | 0.0012 | 3  | 63509964  | OTTHUMG00000158699;SYNPR         | 0      |
| rs7622692  | 0.0012 | 3  | 189340241 | TP63;OTTHUMG00000156313          | -8964  |
| rs7835137  | 0.0012 | 8  | 128675771 | AC108925.1                       | 22818  |
| rs10826316 | 0.0012 | 10 | 61331087  | RP11-135D11.2;OTTHUMG00000018280 | -17821 |
| rs623229   | 0.0012 | 1  | 48027067  | RP4-666O22.2;OTTHUMG00000007966  | 10642  |
| rs1931572  | 0.0012 | 1  | 94588992  | ABCR ;ABCA4;OTTHUMG00000010622   | -2304  |
| rs17608026 | 0.0012 | 4  | 38195269  | AC098680.2                       | -44965 |
| rs3132636  | 0.0012 | 6  | -9        | N/A                              | -9     |
| rs2306894  | 0.0012 | 12 | 10251445  | CLEC1A                           | 0      |
| rs1411700  | 0.0012 | 1  | 94634963  | ARHGAP29;OTTHUMG00000010643      | 2344   |
| rs6426885  | 0.0012 | 1  | 164903228 | OTTHUMG00000034480;RP11-403P14.1 | -12362 |
| rs1975386  | 0.0012 | 2  | 4855697   | AC092169.1                       | 18894  |
| rs1522988  | 0.0012 | 2  | 45865675  | OTTHUMG00000128817;PRKCE         | -12809 |
| rs6463049  | 0.0012 | 7  | 41878017  | AC005027.4;OTTHUMG00000155114    | 59031  |
| rs6967655  | 0.0012 | 7  | 153024613 | AC073236.3;OTTHUMG00000151464    | 72392  |
| rs4955848  | 0.0012 | 3  | 55392281  | RP11-875H7.2;OTTHUMG00000158358  | 2190   |

|            |        |    |           |                                  |         |
|------------|--------|----|-----------|----------------------------------|---------|
| rs11243307 | 0.0012 | 6  | 981976    | RP5-1077H22.1;OTTHUMG00000014118 | -19465  |
| rs17798871 | 0.0012 | 7  | 51062256  | OTTHUMG00000155997;RP4-724E13.2  | 0       |
| rs642174   | 0.0012 | 8  | 36124334  | AC124073.1                       | 52      |
| rs2732090  | 0.0012 | 8  | 71918257  | EYA1;OTTHUMG00000149894          | 191411  |
| rs11244489 | 0.0012 | 10 | 127131942 | RPS27P18;OTTHUMG00000019226      | 30313   |
| rs572528   | 0.0012 | 15 | 53972484  | WDR72;OTTHUMG00000131939         | 0       |
| rs8096468  | 0.0012 | 18 | 73602007  | AC090338.1                       | -177667 |
| rs10498255 | 0.0013 | 2  | 231612230 | OTTHUMG00000133220;CAB39         | 0       |
| rs2065887  | 0.0013 | 9  | 1634740   | AL358934.1                       | 300787  |
| rs12587635 | 0.0013 | 14 | 98173538  | AL163872.1                       | -20543  |
| rs11133874 | 0.0013 | 5  | 17040764  | AC026790.1                       | 76921   |
| rs11791715 | 0.0013 | 9  | 83667401  | RP11-289F5.1;OTTHUMG00000020080  | -181191 |
| rs4931019  | 0.0013 | 12 | 32746331  | OTTHUMG00000137374;FGD4          | 0       |
| rs284898   | 0.0013 | 15 | 76750695  | SCAPER                           | 0       |
| rs9900652  | 0.0013 | 17 | 71273999  | AC087301.1                       | 0       |
| rs3127503  | 0.0013 | 1  | 187662030 | OTTHUMG00000035625;RP11-393M18.4 | -13662  |
| rs3120958  | 0.0013 | 1  | 187662310 | OTTHUMG00000035625;RP11-393M18.4 | -13382  |
| rs3904536  | 0.0013 | 10 | 85577128  | AC069540.1                       | 52908   |
| rs7554730  | 0.0013 | 1  | 164885860 | OTTHUMG00000034480;RP11-403P14.1 | 4694    |
| rs2222610  | 0.0013 | 7  | 122647812 | TAS2R16;OTTHUMG00000157090       | -12058  |
| rs4612246  | 0.0013 | 7  | 153913038 | OTTHUMG00000151511;DPP6          | 0       |
| rs2305612  | 0.0013 | 3  | 15518731  | COLQ;OTTHUMG00000156233          | 0       |
| rs7971843  | 0.0013 | 12 | 129899658 | TMEM132D                         | 0       |
| rs466541   | 0.0013 | 21 | 15970716  | OTTHUMG00000074315;AF165138.7    | 0       |
| rs7575523  | 0.0013 | 2  | 59335104  | AC007092.1;OTTHUMG00000152613    | 44203   |
| rs9384582  | 0.0013 | 6  | 106221407 | RP3-359N14.1;OTTHUMG00000016419  | 105534  |
| rs6683932  | 0.0013 | 1  | 184447624 | OTTHUMG00000035386;C1orf21       | 0       |
| rs4666562  | 0.0013 | 2  | 19948931  | AC019055.1;OTTHUMG00000151775    | 31594   |
| rs10497868 | 0.0013 | 2  | 202304040 | OTTHUMG00000132822;TRAK2         | 0       |
| rs2316481  | 0.0013 | 3  | 56199963  | OTTHUMG00000158390;ERC2          | 0       |
| rs28420079 | 0.0013 | 4  | 30737146  | PCDH7;OTTHUMG00000160364         | 0       |
| rs17361495 | 0.0013 | 4  | 153113117 | RP11-18H21.2;OTTHUMG00000161723  | -13392  |
| rs7763928  | 0.0013 | 6  | 106209759 | RP3-359N14.1;OTTHUMG00000016419  | 93886   |
| rs565583   | 0.0013 | 6  | 137562335 | IFNGR1;OTTHUMG00000015656        | -21749  |
| rs9663367  | 0.0013 | 10 | 19776910  | C10orf112;OTTHUMG00000017779     | 0       |
| rs4775014  | 0.0013 | 15 | 58444556  | AQP9;OTTHUMG00000132631          | 0       |
| rs2647463  | 0.0013 | 1  | 220155228 | EPRS;OTTHUMG00000037433          | 0       |

|            |        |    |           |                                  |         |
|------------|--------|----|-----------|----------------------------------|---------|
| rs11688172 | 0.0013 | 2  | 150793155 | AC007364.1;OTTHUMG00000153746    | -77450  |
| rs17458714 | 0.0013 | 3  | 85601301  | CADM2;OTTHUMG00000158990         | -174331 |
| rs16886744 | 0.0013 | 5  | 56380977  | RP11-101B14.4;OTTHUMG00000162326 | -3199   |
| rs2644671  | 0.0013 | 5  | 174937975 | OTTHUMG00000130555;SFXN1         | 0       |
| rs713286   | 0.0013 | 8  | 9171735   | AC022784.1                       | -26647  |
| rs4482278  | 0.0013 | 16 | 56726874  | MT1A                             | 0       |
| rs35451508 | 0.0013 | 17 | -9        | N/A                              | -9      |
| rs1990410  | 0.0013 | 2  | 107786595 | AC006227.1;OTTHUMG00000153205    | 84552   |
| rs13137924 | 0.0013 | 4  | 30643978  | RP11-495L18.2;OTTHUMG00000160368 | 77060   |
| rs2732087  | 0.0013 | 8  | 71860439  | AC020987.1                       | -167196 |
| rs581984   | 0.0013 | 11 | 87963023  | RAB38                            | -54388  |
| rs2391467  | 0.0014 | 1  | 94850443  | OTTHUMG00000010653;RP11-366L18.1 | 21512   |
| rs4613321  | 0.0014 | 2  | 650647    | TMEM18;OTTHUMG00000151381        | 16688   |
| rs16856652 | 0.0014 | 1  | 163574728 | AL513307.1                       | 95343   |
| rs17670898 | 0.0014 | 2  | 20599304  | AC007041.1                       | 2084    |
| rs17346216 | 0.0014 | 3  | 64299967  | PRICKLE2;OTTHUMG00000158789      | -46312  |
| rs273077   | 0.0014 | 5  | 174955746 | OTTHUMG00000130555;SFXN1         | 0       |
| rs4759644  | 0.0014 | 12 | 130762251 | AC026764.1                       | 37901   |
| rs3120970  | 0.0014 | 1  | 187675285 | OTTHUMG00000035625;RP11-393M18.4 | -407    |
| rs2130926  | 0.0014 | 4  | 23712830  | OTTHUMG00000160278;RP11-380P13.1 | 0       |
| rs1205030  | 0.0014 | 6  | 3484797   | AL160398.1                       | 23765   |
| rs919529   | 0.0014 | 7  | 84490873  | OTTHUMG00000154642;AC093716.1    | -13304  |
| rs1348535  | 0.0014 | 8  | 71662741  | XKR9                             | 14565   |
| rs10836244 | 0.0014 | 11 | 34481095  | CAT;OTTHUMG00000044353           | 0       |
| rs10198652 | 0.0014 | 2  | 55538976  | CCDC88A;OTTHUMG00000151915       | 0       |
| rs581403   | 0.0014 | 6  | 6556120   | RP3-398D13.3;OTTHUMG00000014192  | 0       |
| rs7854823  | 0.0014 | 9  | 93126348  | OTTHUMG00000020194;RP11-389K14.3 | 0       |
| rs7953222  | 0.0014 | 12 | 31311075  | AC008013.3                       | 0       |
| rs1079989  | 0.0014 | 1  | 14367635  | C1orf196;OTTHUMG00000008026      | 0       |
| rs10192503 | 0.0014 | 2  | 2604810   | AC018685.1;OTTHUMG00000151395    | 40951   |
| rs1344156  | 0.0014 | 5  | 178950814 | AC136628.1                       | 0       |
| rs7768436  | 0.0014 | 6  | 118541407 | SLC35F1;OTTHUMG00000015460       | 0       |
| rs7143078  | 0.0014 | 14 | 72613949  | RGS6                             | 0       |
| rs9892194  | 0.0014 | 17 | 55825825  | AC007431.1;OTTHUMG00000132063    | -3152   |
| rs11131099 | 0.0014 | 3  | 848802    | AC090044.1;OTTHUMG00000154876    | 0       |
| rs2030350  | 0.0014 | 3  | 166749553 | AC092965.1                       | 6266    |
| rs230681   | 0.0014 | 5  | 13494184  | OTTHUMG00000161748;CTD-2042D5.1  | 59579   |

|            |        |    |           |                                   |         |
|------------|--------|----|-----------|-----------------------------------|---------|
| rs1333656  | 0.0014 | 6  | 10296486  | RP1-290I10.2;OTTHUMG00000014229   | 69371   |
| rs11053580 | 0.0014 | 12 | 10249358  | CLEC1A                            | 0       |
| rs6711012  | 0.0014 | 2  | 624034    | TMEM18;OTTHUMG000000151381        | 43301   |
| rs2572318  | 0.0014 | 4  | 90718719  | SNCA;OTTHUMG000000130948          | 0       |
| rs2051169  | 0.0014 | 8  | 35934191  | AC124073.1                        | -189812 |
| rs7048728  | 0.0014 | 9  | 93104329  | OTTHUMG00000020194;RP11-389K14.3  | 0       |
| rs11675753 | 0.0014 | 2  | 206455402 | PARD3B;OTTHUMG000000154562        | 0       |
| rs7830550  | 0.0014 | 8  | 71570431  | LACTB2                            | 0       |
| rs1887241  | 0.0014 | 10 | 14161557  | FRMD4A;OTTHUMG000000017708        | 0       |
| rs12895415 | 0.0014 | 14 | 72572155  | RGS6                              | 0       |
| rs11159287 | 0.0014 | 14 | 25890366  | AL163052.1                        | -153824 |
| rs12924882 | 0.0014 | 16 | 6180907   | AC012175.1                        | -370118 |
| rs3127502  | 0.0014 | 1  | 187661803 | OTTHUMG000000035625;RP11-393M18.4 | -13889  |
| rs3130362  | 0.0014 | 6  | -9        | N/A                               | -9      |
| rs11222221 | 0.0014 | 11 | 130488369 | OTTHUMG000000150705;C11orf44      | -54482  |
| rs7321962  | 0.0014 | 13 | 97929231  | OTTHUMG000000017239;MBNL2         | 0       |
| rs3120971  | 0.0015 | 1  | 187676781 | OTTHUMG000000035625;RP11-393M18.4 | 0       |
| rs2867109  | 0.0015 | 2  | 651030    | TMEM18;OTTHUMG000000151381        | 16305   |
| rs17506660 | 0.0015 | 5  | 120388740 | CTD-2613O8.1;OTTHUMG000000163022  | -6199   |
| rs1721400  | 0.0015 | 7  | 38060785  | SFRP4;OTTHUMG000000023026         | 0       |
| rs10777965 | 0.0015 | 12 | 99626553  | ANKS1B                            | 0       |
| rs1013518  | 0.0015 | 6  | -9        | N/A                               | -9      |
| rs1583147  | 0.0015 | 7  | 84471207  | OTTHUMG000000154642;AC093716.1    | 5986    |
| rs10989153 | 0.0015 | 9  | 103319797 | TMEFF1;OTTHUMG000000020367        | 0       |
| rs12328774 | 0.0015 | 2  | 202882897 | FZD7;OTTHUMG000000132841          | -16413  |
| rs9847400  | 0.0015 | 3  | 189372997 | TP63;OTTHUMG000000156313          | 0       |
| rs2383666  | 0.0015 | 1  | 187666751 | OTTHUMG000000035625;RP11-393M18.4 | -8941   |
| rs6428056  | 0.0015 | 1  | 188672106 | RP11-316I3.1;OTTHUMG000000035544  | 2648    |
| rs7588300  | 0.0015 | 2  | 200308530 | OTTHUMG000000132767;SATB2         | 0       |
| rs9813959  | 0.0015 | 3  | 16710679  | DAZL;OTTHUMG000000157050          | 0       |
| rs6439982  | 0.0015 | 3  | 140939428 | OTTHUMG000000160171;ACPL2         | -8140   |
| rs10804951 | 0.0015 | 3  | 192983331 | OTTHUMG000000156104;HRASLS        | 0       |
| rs1531305  | 0.0015 | 4  | 58960261  | OTTHUMG000000160660;RP11-25L5.1   | -9052   |
| rs2283079  | 0.0015 | 7  | 126496513 | OTTHUMG000000022888;GRM8          | 0       |
| rs7180721  | 0.0015 | 15 | 96816581  | AC012409.1                        | 0       |
| rs236387   | 0.0015 | 6  | 36784327  | CPNE5;OTTHUMG000000014602         | 0       |
| rs7814274  | 0.0015 | 8  | 71570411  | LACTB2                            | 0       |

|            |        |    |           |                                  |         |
|------------|--------|----|-----------|----------------------------------|---------|
| rs13257800 | 0.0015 | 8  | 71714133  | AC020987.1                       | -20890  |
| rs4584535  | 0.0015 | 11 | 25255960  | LUZP2                            | 155756  |
| rs4611418  | 0.0015 | 15 | 29443503  | FAM189A1                         | 0       |
| rs7217284  | 0.0015 | 17 | 59336394  | BCAS3                            | 0       |
| rs2991986  | 0.0015 | 1  | 46081282  | OTTHUMG00000007826;NASP          | 0       |
| rs6656330  | 0.0015 | 1  | 48029727  | RP4-666O22.2;OTTHUMG00000007966  | 13302   |
| rs11926918 | 0.0015 | 3  | 117506589 | RP11-384F7.2;OTTHUMG00000159530  | 0       |
| rs4697518  | 0.0015 | 4  | 24993167  | LGI2;OTTHUMG00000097749          | 7302    |
| rs4868311  | 0.0015 | 5  | 173165659 | BOD1;OTTHUMG00000130540          | -121996 |
| rs743386   | 0.0015 | 21 | 33236455  | OTTHUMG00000085019;HUNK          | -9173   |
| rs2836358  | 0.0015 | 21 | 39764016  | ERG;OTTHUMG00000090767           | 0       |
| rs6712841  | 0.0015 | 2  | 174313400 | AC073465.1;OTTHUMG00000154105    | -16860  |
| rs9290289  | 0.0015 | 3  | 166056401 | RP11-12N13.1;OTTHUMG00000158170  | 44260   |
| rs3132644  | 0.0015 | 6  | -9        | N/A                              | -9      |
| rs748121   | 0.0015 | 9  | 93112028  | OTTHUMG00000020194;RP11-389K14.3 | 0       |
| rs2398009  | 0.0015 | 10 | 10045145  | OTTHUMG00000017655;RP5-933E2.1   | -55540  |
| rs9317182  | 0.0015 | 13 | 61925472  | PCDH20;OTTHUMG00000017012        | 58349   |
| rs11682343 | 0.0015 | 2  | 85668988  | AC016753.1                       | 51      |
| rs6911094  | 0.0015 | 6  | 118541566 | SLC35F1;OTTHUMG00000015460       | 0       |
| rs3108090  | 0.0015 | 7  | 67783656  | RP5-945F2.3;OTTHUMG00000156582   | -30436  |
| rs2977486  | 0.0015 | 8  | 141566579 | EIF2C2                           | 0       |
| rs12263577 | 0.0015 | 10 | 10077215  | OTTHUMG00000017655;RP5-933E2.1   | -23470  |
| rs7249392  | 0.0015 | 19 | 34090877  | CTD-2329C7.1;OTTHUMG00000158155  | -10283  |
| rs2199312  | 0.0015 | 4  | 115434478 | UGT8;OTTHUMG00000132915          | -85133  |
| rs6857285  | 0.0015 | 4  | 119650630 | SEC24D;OTTHUMG00000132957        | 0       |
| rs6895202  | 0.0015 | 5  | 27199236  | OTTHUMG00000090671;CDH9          | -77979  |
| rs328906   | 0.0015 | 7  | 35023915  | DPY19L1;OTTHUMG00000154888       | 0       |
| rs4728560  | 0.0015 | 7  | 84359284  | OTTHUMG00000154642;AC093716.1    | 117909  |
| rs2210416  | 0.0015 | 9  | 81394130  | AL592047.4                       | -35702  |
| rs7132055  | 0.0015 | 12 | 122346034 | AC069503.1                       | 0       |
| rs12463166 | 0.0015 | 19 | 34174260  | CHST8                            | 0       |
| rs2185903  | 0.0016 | 1  | 164902821 | OTTHUMG00000034480;RP11-403P14.1 | -11955  |
| rs4321762  | 0.0016 | 5  | 30097218  | AC010374.1                       | 147981  |
| rs760900   | 0.0016 | 6  | 50796634  | OTTHUMG00000014836;TFAP2B        | 0       |
| rs11254761 | 0.0016 | 10 | 6857518   | OTTHUMG00000017627;RP11-799O21.1 | 0       |
| rs1678953  | 0.0016 | 12 | 122385213 | WDR66                            | 0       |
| rs3130641  | 0.0016 | 6  | -9        | N/A                              | -9      |

|            |        |    |           |                                 |        |
|------------|--------|----|-----------|---------------------------------|--------|
| rs7910586  | 0.0016 | 10 | 14720930  | FAM107B;OTTHUMG00000017709      | 0      |
| rs1654     | 0.0016 | 22 | 17596388  | IL17RA;OTTHUMG00000150026       | 0      |
| rs3949342  | 0.0016 | 1  | 120014798 | OTTHUMG00000012522;RP5-871G17.4 | 0      |
| rs890348   | 0.0016 | 3  | 188241949 | LPP;OTTHUMG00000156387          | 0      |
| rs10773799 | 0.0016 | 12 | 131085923 | RIMBP2                          | -83513 |
| rs858010   | 0.0016 | 21 | 39065239  | OTTHUMG00000086667;KCNJ6        | 0      |
| rs2124491  | 0.0016 | 3  | 15529405  | COLQ;OTTHUMG00000156233         | 0      |
| rs17551536 | 0.0016 | 2  | 12252350  | OTTHUMG00000151709;AC096559.1   | 0      |
| rs2306319  | 0.0016 | 10 | 3179842   | PFKP;OTTHUMG00000017556         | 0      |
| rs7088922  | 0.0016 | 10 | 4611369   | AC022535.1                      | 54120  |
| rs11915970 | 0.0016 | 3  | 56169965  | OTTHUMG00000158390;ERC2         | 0      |
| rs2575139  | 0.0016 | 13 | 104664631 | N/A                             | -9     |
| rs2453568  | 0.0016 | 17 | 19457509  | SLC47A1;OTTHUMG00000059466      | 0      |
| rs11660192 | 0.0016 | 18 | 20194159  | RP11-863N1.1;OTTHUMG00000158176 | 26969  |
| rs881926   | 0.0016 | 7  | 38029785  | SFRP4;OTTHUMG00000023026        | 0      |
| rs2030661  | 0.0017 | 3  | 951367    | AC090044.2;OTTHUMG00000154884   | 51593  |
| rs236395   | 0.0017 | 6  | 36776677  | CPNE5;OTTHUMG00000014602        | 0      |
| rs1015330  | 0.0017 | 6  | 36786072  | CPNE5;OTTHUMG00000014602        | 0      |
| rs4718559  | 0.0017 | 7  | 66867876  | AC099758.1                      | -3258  |
| rs11622031 | 0.0017 | 14 | 24624191  | OTTHUMG00000028798;RNF31        | 0      |
| rs6572682  | 0.0017 | 14 | 51144800  | SAV1;OTTHUMG00000140293         | -9751  |
| rs16855558 | 0.0017 | 1  | 205388175 | OTTHUMG00000037201;LEMD1        | 0      |
| rs6796490  | 0.0017 | 3  | 48237104  | OTTHUMG00000133535;CDC25A       | -7212  |
| rs10474498 | 0.0017 | 5  | 76614587  | PDE8B;OTTHUMG00000102170        | 0      |
| rs9656797  | 0.0017 | 8  | 115181572 | AC046174.1                      | 218345 |
| rs911546   | 0.0017 | 10 | 105530990 | SH3PXD2A;OTTHUMG00000018997     | 0      |
| rs4314021  | 0.0017 | 2  | 22639186  | OTTHUMG00000151815;AC096570.2   | 0      |
| rs10144234 | 0.0017 | 14 | 51172219  | AL358334.1                      | 0      |
| rs678892   | 0.0017 | 15 | 55632859  | PIGB                            | 0      |
| rs1547924  | 0.0017 | 1  | 46085112  | OTTHUMG00000007826;NASP         | 546    |
| rs4397657  | 0.0017 | 1  | 188672537 | RP11-316I3.1;OTTHUMG00000035544 | 2217   |
| rs7689746  | 0.0017 | 4  | 95574123  | OTTHUMG00000130973;PDLIM5       | 0      |
| rs1432628  | 0.0017 | 5  | 148251668 | ADRB2;OTTHUMG00000129933        | 43480  |
| rs7799648  | 0.0017 | 7  | 84503579  | OTTHUMG00000154605;AC074183.2   | -2291  |
| rs762018   | 0.0017 | 14 | 89425304  | TTC8                            | 80970  |
| rs1420679  | 0.0017 | 16 | 49609203  | ZNF423                          | 0      |
| rs17011370 | 0.0017 | 2  | 75692623  | FAM176A;OTTHUMG00000129991      | 3805   |

|            |        |    |           |                                  |         |
|------------|--------|----|-----------|----------------------------------|---------|
| rs7751261  | 0.0017 | 6  | 5541394   | FARS2;OTTHUMG00000014178         | 0       |
| rs3132666  | 0.0017 | 6  | -9        | N/A                              | -9      |
| rs4240586  | 0.0017 | 6  | 100520931 | RP11-14I4.3;OTTHUMG00000015271   | 0       |
| rs2817536  | 0.0017 | 14 | 47008184  | OTTHUMG00000157869;RPL10L        | 112038  |
| rs3792074  | 0.0017 | 2  | 231665946 | OTTHUMG00000133220;CAB39         | 0       |
| rs298998   | 0.0017 | 4  | 119623467 | OTTHUMG00000161167;METTL14       | 0       |
| rs35068    | 0.0017 | 12 | 31148662  | TSPAN11                          | 0       |
| rs886895   | 0.0017 | 17 | 10958454  | AC005284.1                       | 1202    |
| rs17160256 | 0.0017 | 1  | 146967196 | RP11-441L11.1;OTTHUMG00000041476 | 18962   |
| rs4784368  | 0.0017 | 16 | 51594190  | AC084058.1                       | -85539  |
| rs9543150  | 0.0017 | 13 | 73441917  | PIBF1;OTTHUMG00000017071         | 0       |
| rs6756729  | 0.0017 | 2  | 233957253 | OTTHUMG00000133688;INPP5D        | 0       |
| rs17633132 | 0.0017 | 8  | 17500119  | PDGFRL;OTTHUMG00000130818        | 0       |
| rs2820917  | 0.0017 | 9  | 7192313   | OTTHUMG00000019536;KDM4C         | 16665   |
| rs157768   | 0.0017 | 15 | 76833779  | SCAPER                           | 0       |
| rs8105572  | 0.0017 | 19 | 7809327   | CD209                            | 0       |
| rs6662320  | 0.0017 | 1  | 14370368  | C1orf196;OTTHUMG00000008026      | 0       |
| rs1931020  | 0.0017 | 6  | 10155671  | OFCC1;OTTHUMG00000159104         | 0       |
| rs851193   | 0.0018 | 1  | 223294851 | TLR5;OTTHUMG00000037937          | 0       |
| rs7318424  | 0.0018 | 13 | 111021623 | OTTHUMG00000017344;COL4A2        | 0       |
| rs17105723 | 0.0018 | 14 | 77810194  | TMED8                            | 0       |
| rs284907   | 0.0018 | 15 | 76741569  | SCAPER                           | 0       |
| rs1972410  | 0.0018 | 1  | 46080947  | OTTHUMG00000007826;NASP          | 0       |
| rs7546417  | 0.0018 | 1  | 114668299 | SYT6;OTTHUMG00000011755          | 0       |
| rs9684084  | 0.0018 | 4  | 137408445 | RP11-625B21.1;OTTHUMG00000161241 | -65946  |
| rs9604118  | 0.0018 | 13 | 114106698 | OTTHUMG00000017386;ADPRHL1       | 0       |
| rs216568   | 0.0018 | 18 | 54049240  | AC009271.1                       | -190747 |
| rs17013635 | 0.0018 | 2  | 77263452  | LRRTM4;OTTHUMG00000152842        | 0       |
| rs17147703 | 0.0018 | 5  | 120725880 | OTTHUMG00000162941;CTC-546K23.1  | 64348   |
| rs6944332  | 0.0018 | 7  | 6758018   | PMS2CL;OTTHUMG00000151857        | 0       |
| rs725961   | 0.0018 | 9  | 81349656  | AL592047.5                       | -6659   |
| rs2618321  | 0.0018 | 3  | 105699113 | OTTHUMG00000150654;CBLB          | -110717 |
| rs6875540  | 0.0018 | 5  | 62367454  | AC113420.1                       | -11778  |
| rs2723260  | 0.0018 | 12 | 40601708  | LRRK2;OTTHUMG00000059742         | 0       |
| rs10514573 | 0.0018 | 16 | 83453851  | CDH13                            | 0       |
| rs11728822 | 0.0018 | 4  | 143462713 | INPP4B;OTTHUMG00000161341        | 0       |
| rs8000773  | 0.0018 | 13 | 46123555  | FAM194B;OTTHUMG00000016856       | 0       |

|            |        |    |           |                                  |         |
|------------|--------|----|-----------|----------------------------------|---------|
| rs2401785  | 0.0018 | 14 | 89417252  | TTC8                             | 72918   |
| rs6716271  | 0.0018 | 2  | 68398919  | PNO1;OTTHUMG00000129563          | 0       |
| rs11949240 | 0.0018 | 5  | 17042902  | AC026790.1                       | 74783   |
| rs6891378  | 0.0018 | 5  | 115750865 | OTTHUMG00000162922;COMMD10       | 2406    |
| rs11989734 | 0.0018 | 8  | 118244191 | SLC30A8                          | 55238   |
| rs1951337  | 0.0018 | 14 | 89423736  | TTC8                             | 79402   |
| rs148210   | 0.0018 | 1  | 114749024 | RP4-543J13.1;OTTHUMG00000011899  | -25     |
| rs13401780 | 0.0018 | 2  | 55294916  | RTN4;OTTHUMG00000129337          | 0       |
| rs4712535  | 0.0018 | 6  | 10299923  | RP1-290I10.2;OTTHUMG00000014229  | 65934   |
| rs1982016  | 0.0018 | 7  | 84444871  | OTTHUMG00000154642;AC093716.1    | 32322   |
| rs7821344  | 0.0018 | 8  | 20184824  | OTTHUMG00000097027;LZTS1         | -23350  |
| rs9587062  | 0.0018 | 13 | 106665115 | AL138701.1                       | -115123 |
| rs6128241  | 0.0018 | 20 | 56577581  | AL354984.2                       | 26432   |
| rs12637095 | 0.0018 | 3  | 118192303 | RP11-384F7.1;OTTHUMG00000159346  | 0       |
| rs2503662  | 0.0018 | 6  | 92756602  | RP11-173O8.1;OTTHUMG00000015223  | 32150   |
| rs2023328  | 0.0018 | 7  | 35031630  | DPY19L1;OTTHUMG00000154888       | 0       |
| rs13273773 | 0.0018 | 8  | 71779247  | AC020987.1                       | -86004  |
| rs10114509 | 0.0018 | 9  | 1635701   | AL358934.1                       | 301748  |
| rs11178648 | 0.0018 | 12 | 71533210  | TSPAN8                           | 0       |
| rs8048358  | 0.0018 | 16 | 9390035   | RP11-473I1.1;OTTHUMG00000158086  | -139297 |
| rs16942361 | 0.0018 | 17 | 55840238  | AC007431.1;OTTHUMG00000132063    | -17565  |
| rs2925773  | 0.0018 | 8  | 24741725  | NEFM;OTTHUMG00000131990          | -28800  |
| rs1832746  | 0.0018 | 9  | 18499087  | ADAMTSL1;OTTHUMG00000019604      | 0       |
| rs2478291  | 0.0018 | 13 | 106636340 | AL138701.1                       | -86348  |
| rs2729118  | 0.0018 | 3  | 1118039   | AC087430.1                       | -10480  |
| rs2178491  | 0.0018 | 5  | 30829677  | CTD-2239K20.1;OTTHUMG00000161940 | -58280  |
| rs10989094 | 0.0018 | 9  | 103202590 | C9orf30;OTTHUMG00000020365       | 0       |
| rs11043885 | 0.0018 | 12 | 18287994  | RERGL                            | -44880  |
| rs4767254  | 0.0018 | 12 | 115198392 | AC026765.2                       | 0       |
| rs225842   | 0.0018 | 14 | 30552936  | OTTHUMG00000157690;RP11-269C4.1  | 27776   |
| rs3024660  | 0.0018 | 16 | 27371158  | IL4R;OTTHUMG00000097015          | 0       |
| rs10180656 | 0.0019 | 2  | 52790140  | AC139712.2;OTTHUMG00000151839    | -7646   |
| rs7568564  | 0.0019 | 2  | 125430787 | OTTHUMG00000153356;CNTNAP5       | 0       |
| rs2134224  | 0.0019 | 3  | 122002178 | OTTHUMG00000159491;CASR          | 0       |
| rs506067   | 0.0019 | 9  | 73436356  | TRPM3;OTTHUMG00000019997         | 0       |
| rs724975   | 0.0019 | 9  | 121788712 | DBC1;OTTHUMG00000021020          | 127024  |
| rs11671361 | 0.0019 | 19 | 16926067  | NWD1                             | 0       |

|            |        |    |           |                                  |        |
|------------|--------|----|-----------|----------------------------------|--------|
| rs9960     | 0.0019 | 1  | 43317793  | OTTHUMG00000007623;ZNF691        | 0      |
| rs2925774  | 0.0019 | 8  | 24741839  | NEFM;OTTHUMG00000131990          | -28686 |
| rs4800418  | 0.0019 | 18 | 20146740  | RP11-863N1.1;OTTHUMG00000158176  | -19688 |
| rs756796   | 0.0019 | 19 | 35809800  | MAG                              | 5093   |
| rs11696066 | 0.0019 | 2  | 5295956   | AC073143.1;OTTHUMG00000151417    | 157917 |
| rs9812880  | 0.0019 | 3  | 193012791 | OTTHUMG00000156101;ATP13A5       | 0      |
| rs7692721  | 0.0019 | 4  | 119613917 | OTTHUMG00000161167;METTL14       | 0      |
| rs2100667  | 0.0019 | 1  | 188673494 | RP11-316I3.1;OTTHUMG00000035544  | 1260   |
| rs10510169 | 0.0019 | 3  | 1315199   | OTTHUMG00000119030;CNTN6         | 0      |
| rs6834812  | 0.0019 | 4  | 61061173  | AC092596.2                       | 361288 |
| rs7660113  | 0.0019 | 4  | 61371895  | AC095061.1                       | 157772 |
| rs9586352  | 0.0019 | 13 | 104666668 | N/A                              | -9     |
| rs298992   | 0.0019 | 4  | 119641941 | SEC24D;OTTHUMG00000132957        | 2037   |
| rs6847706  | 0.0019 | 4  | 119661552 | SEC24D;OTTHUMG00000132957        | 0      |
| rs1592853  | 0.0019 | 5  | 98051737  | CTC-463N11.1;OTTHUMG00000162746  | 34666  |
| rs10486147 | 0.0019 | 7  | 11659973  | OTTHUMG00000152346;THSD7A        | 0      |
| rs985492   | 0.0019 | 18 | 29311034  | AC017100.1                       | 11863  |
| rs3816745  | 0.0019 | 8  | 71506634  | TRAM1                            | 0      |
| rs7894473  | 0.0019 | 10 | 71511081  | RP11-242G20.2;OTTHUMG00000018392 | -27637 |
| rs7260649  | 0.0019 | 19 | 57487497  | AC044792.1                       | 53709  |
| rs1572516  | 0.0019 | 1  | 103591909 | COL11A1;OTTHUMG00000010872       | -17857 |
| rs4751084  | 0.0019 | 10 | 131219569 | MGMT;OTTHUMG00000019261          | -45909 |
| rs7698815  | 0.0019 | 4  | 177025984 | OTTHUMG00000160791;WDR17         | 0      |
| rs1593948  | 0.0019 | 5  | 66558560  | CTD-2187J20.1;OTTHUMG00000162351 | -5290  |
| rs7017481  | 0.0019 | 8  | 71676770  | AC020987.1                       | 16379  |
| rs1492251  | 0.0019 | 12 | 99624271  | ANKS1B                           | 0      |
| rs542054   | 0.0019 | 13 | 51427173  | RP11-233H19.2;OTTHUMG00000016935 | 4028   |
| rs4775184  | 0.0019 | 15 | 59862200  | AC092754.1                       | 4102   |
| rs6854328  | 0.0019 | 4  | 119683492 | SEC24D;OTTHUMG00000132957        | 0      |
| rs4378202  | 0.002  | 1  | 113331134 | OTTHUMG00000012022;RP11-426L16.8 | 31658  |
| rs4501794  | 0.002  | 1  | 187677281 | OTTHUMG00000035625;RP11-393M18.4 | 0      |
| rs10937044 | 0.002  | 3  | 180425009 | OTTHUMG00000157857;CCDC39        | 0      |
| rs6834895  | 0.002  | 4  | 72428579  | OTTHUMG00000129907;SLC4A4        | 0      |
| rs4743123  | 0.002  | 9  | 98400242  | OTTHUMG00000020285;RP11-180I4.2  | -12194 |
| rs2275086  | 0.002  | 1  | 46085879  | CCDC17;OTTHUMG00000007822        | 0      |
| rs7521970  | 0.002  | 1  | 59756222  | OTTHUMG00000008424;FGGY          | -6245  |
| rs2167197  | 0.002  | 3  | 13669664  | FBLN2;OTTHUMG00000155437         | 0      |

|            |        |    |           |                                  |         |
|------------|--------|----|-----------|----------------------------------|---------|
| rs7156303  | 0.002  | 14 | 47095317  | OTTHUMG00000157869;RPL10L        | 24905   |
| rs242250   | 0.002  | 17 | 17258672  | OTTHUMG00000059277;NT5M          | 7695    |
| rs11102463 | 0.002  | 1  | 112901349 | RP5-965F6.2;OTTHUMG00000012183   | 0       |
| rs12693436 | 0.002  | 2  | 187001076 | OTTHUMG00000154253;AC104058.1    | 26600   |
| rs2046779  | 0.002  | 4  | 119653822 | SEC24D;OTTHUMG00000132957        | 0       |
| rs166641   | 0.002  | 5  | 174955572 | OTTHUMG00000130555;SFXN1         | 0       |
| rs17325644 | 0.002  | 10 | 85576980  | AC069540.1                       | 52760   |
| rs1998137  | 0.002  | 14 | 26875807  | NOVA1;OTTHUMG00000029385         | 39282   |
| rs17122909 | 0.002  | 14 | 51262151  | OTTHUMG00000029569;NIN           | 0       |
| rs2251480  | 0.002  | 15 | 54167341  | AC066611.1                       | 110834  |
| rs1160530  | 0.002  | 1  | 208098165 | CD34;OTTHUMG00000036565          | -13418  |
| rs17506627 | 0.002  | 1  | 222506713 | RP11-400N13.1;OTTHUMG00000037290 | 0       |
| rs12713636 | 0.002  | 2  | 68435431  | PPP3R1;OTTHUMG00000129561        | 0       |
| rs1007361  | 0.002  | 3  | 28801369  | AC109586.1;OTTHUMG00000155718    | 2073    |
| rs2004115  | 0.002  | 2  | 19811100  | AC019055.1;OTTHUMG00000151775    | -100376 |
| rs17058799 | 0.002  | 5  | 160546673 | AC022120.1                       | 110384  |
| rs10123250 | 0.002  | 9  | 93161060  | OTTHUMG00000020194;RP11-389K14.3 | 0       |
| rs1943528  | 0.002  | 11 | 126377455 | KIRREL3                          | 0       |
| rs3124124  | 0.002  | 1  | 246710091 | TFB2M;OTTHUMG00000040091         | 0       |
| rs2478289  | 0.002  | 13 | 106637275 | AL138701.1                       | -87283  |
| rs6572681  | 0.002  | 14 | 51117059  | SAV1;OTTHUMG00000140293          | 0       |
| rs12593847 | 0.002  | 15 | 26252033  | AC100836.1                       | 0       |
| rs2542944  | 0.002  | 2  | 172421100 | CYBRD1;OTTHUMG00000132260        | 6457    |
| rs32854    | 0.002  | 16 | 69068340  | OTTHUMG00000158195;RPS2P45       | 0       |
| rs2850761  | 0.002  | 18 | 60966397  | OTTHUMG00000132791;BCL2          | 0       |
| rs2732140  | 0.002  | 8  | 71910726  | EYA1;OTTHUMG00000149894          | 198942  |
| rs8048671  | 0.002  | 16 | 13336444  | OTTHUMG00000154258;SHISA9        | 6878    |
| rs2305691  | 0.002  | 16 | 57171397  | CPNE2;OTTHUMG00000133471         | 0       |
| rs4883921  | 0.0021 | 13 | 73598576  | PIBF1;OTTHUMG00000017071         | 7984    |
| rs13036348 | 0.0021 | 20 | 57678828  | MRPS16P;OTTHUMG00000032863       | -9451   |
| rs3804592  | 0.0021 | 3  | 121979229 | OTTHUMG00000159491;CASR          | 0       |
| rs6468235  | 0.0021 | 8  | 34020667  | OTTHUMG00000158593;RP1-84O15.1   | 159609  |
| rs13270004 | 0.0021 | 8  | 96273255  | C8orf37                          | 0       |
| rs11037473 | 0.0021 | 11 | 43576067  | OTTHUMG00000154881;AC023085.1    | -2241   |
| rs17082882 | 0.0021 | 18 | 68267731  | AC013558.1                       | -24414  |
| rs773878   | 0.0021 | 19 | 16946764  | SIN3B                            | 0       |
| rs2066118  | 0.0021 | 9  | 1635485   | AL358934.1                       | 301532  |

|            |        |    |           |                                   |         |
|------------|--------|----|-----------|-----------------------------------|---------|
| rs956429   | 0.0021 | 10 | 83600968  | NRG3;OTTHUMG00000018626           | -33838  |
| rs9431445  | 0.0021 | 1  | 221398205 | OTTHUMG000000037356;RP11-453O22.1 | -90642  |
| rs6871535  | 0.0021 | 5  | 30084257  | AC010374.1                        | 135020  |
| rs4352609  | 0.0021 | 5  | 30085792  | AC010374.1                        | 136555  |
| rs2820312  | 0.0021 | 1  | 201869257 | OTTHUMG000000035802;LMOD1         | 0       |
| rs17075993 | 0.0021 | 3  | 43800881  | OTTHUMG000000156509;RP4-672N11.1  | 19572   |
| rs2076472  | 0.0021 | 6  | 41029342  | APOBEC2;OTTHUMG00000014670        | 0       |
| rs1430593  | 0.0021 | 7  | 84490358  | OTTHUMG000000154642;AC093716.1    | -12789  |
| rs10840632 | 0.0021 | 12 | 122375460 | WDR66                             | 0       |
| rs17662369 | 0.0021 | 15 | 53867440  | WDR72;OTTHUMG000000131939         | 0       |
| rs10517558 | 0.0021 | 4  | 63101140  | OTTHUMG000000157487;RP11-30P21.1  | -12872  |
| rs7745284  | 0.0021 | 6  | 37616076  | OTTHUMG00000014626;MDGA1          | 0       |
| rs9374351  | 0.0021 | 6  | 112958214 | OTTHUMG00000015394;RP1-159M24.1   | -19132  |
| rs17721390 | 0.0021 | 8  | 70544235  | SULF1                             | 0       |
| rs17617902 | 0.0021 | 8  | 137118779 | AC105008.1                        | -364041 |
| rs6472551  | 0.0021 | 8  | 71781849  | AC020987.1                        | -88606  |
| rs2663224  | 0.0021 | 13 | 76754041  | AL445929.1                        | 44695   |
| rs17754285 | 0.0021 | 14 | 78591628  | AC007955.1                        | 52518   |
| rs2206442  | 0.0021 | 20 | 38047560  | AL031661.1                        | 65926   |
| rs2762932  | 0.0021 | 20 | 52768391  | CYP24A1;OTTHUMG000000032773       | 1597    |
| rs8075696  | 0.0021 | 17 | 35088930  | MRM1                              | 123533  |
| rs10165122 | 0.0022 | 2  | 12208315  | OTTHUMG000000151709;AC096559.1    | 0       |
| rs1429327  | 0.0022 | 2  | 57216589  | AC010738.1                        | 26607   |
| rs7830695  | 0.0022 | 8  | 84886671  | AC103816.1                        | -321567 |
| rs11052069 | 0.0022 | 12 | 32713919  | OTTHUMG000000137374;FGD4          | 0       |
| rs32853    | 0.0022 | 16 | 69067538  | TMCO7                             | 0       |
| rs7197147  | 0.0022 | 16 | 79723931  | AC009159.1                        | -20297  |
| rs12919109 | 0.0022 | 16 | 83470583  | CDH13                             | 0       |
| rs4287668  | 0.0022 | 18 | 47554353  | MYO5B                             | 0       |
| rs2224133  | 0.0022 | 20 | 36254354  | OTTHUMG000000046198;RP11-425M5.7  | -2833   |
| rs2105242  | 0.0022 | 1  | 163568329 | AL513307.1                        | 88944   |
| rs1368080  | 0.0022 | 2  | 23711427  | KLHL29;OTTHUMG000000151899        | 0       |
| rs10520179 | 0.0022 | 2  | 77274253  | LRRTM4;OTTHUMG000000152842        | 0       |
| rs4695994  | 0.0022 | 4  | 175905542 | RP13-577H12.2;OTTHUMG000000160761 | -5010   |
| rs7919650  | 0.0022 | 10 | 61324135  | OTTHUMG000000018281;RP11-135D11.3 | -12499  |
| rs6124147  | 0.0022 | 20 | 38032487  | AL031661.1                        | 50853   |
| rs13354485 | 0.0022 | 5  | 178199558 | AACSL                             | 0       |

|            |        |    |           |                                  |         |
|------------|--------|----|-----------|----------------------------------|---------|
| rs1835401  | 0.0022 | 7  | 84460354  | OTTHUMG00000154642;AC093716.1    | 16839   |
| rs4771252  | 0.0022 | 13 | 97034989  | HS6ST3;OTTHUMG00000017232        | 0       |
| rs6807027  | 0.0022 | 3  | 60092789  | FHIT;OTTHUMG00000158591          | 0       |
| rs4928220  | 0.0022 | 3  | 99479549  | OTTHUMG00000148669;COL8A1        | 0       |
| rs11845763 | 0.0022 | 14 | 47056987  | OTTHUMG00000157869;RPL10L        | 63235   |
| rs12896331 | 0.0022 | 14 | 47113894  | OTTHUMG00000157869;RPL10L        | 6328    |
| rs1375371  | 0.0022 | 2  | 68463612  | PPP3R1;OTTHUMG00000129561        | 0       |
| rs10515720 | 0.0022 | 5  | 154596267 | AC010591.1                       | -191856 |
| rs9489325  | 0.0022 | 6  | 118554463 | SLC35F1;OTTHUMG00000015460       | 0       |
| rs7895644  | 0.0022 | 10 | 6858920   | OTTHUMG00000017627;RP11-799O21.1 | 0       |
| rs1550532  | 0.0022 | 2  | 234264848 | OTTHUMG00000150257;AC019221.4    | 0       |
| rs6818391  | 0.0022 | 4  | 5830414   | CRMP1;OTTHUMG00000125489         | 0       |
| rs9366301  | 0.0022 | 6  | 10186575  | OFCC1;OTTHUMG00000159104         | 0       |
| rs7742219  | 0.0022 | 6  | 158169955 | AL133510.1                       | -36833  |
| rs6583755  | 0.0022 | 10 | 92891750  | RP11-56M3.1;OTTHUMG00000018739   | 20612   |
| rs6659197  | 0.0022 | 1  | 66239897  | AL513493.1                       | -12865  |
| rs13119988 | 0.0022 | 4  | 14921247  | AC006296.3;OTTHUMG00000160381    | 0       |
| rs6933344  | 0.0022 | 6  | 118541434 | SLC35F1;OTTHUMG00000015460       | 0       |
| rs9514607  | 0.0022 | 13 | 107690330 | AL354741.1                       | -62956  |
| rs3014245  | 0.0022 | 1  | 46086913  | CCDC17;OTTHUMG00000007822        | 0       |
| rs17021644 | 0.0022 | 3  | 28720153  | AC109586.1;OTTHUMG00000155718    | 0       |
| rs2980948  | 0.0022 | 8  | 6713695   | AF233439.1                       | 13724   |
| rs2437844  | 0.0022 | 8  | 117622571 | EIF3H                            | 34485   |
| rs1590748  | 0.0022 | 13 | 110129760 | RP11-460H14.1;OTTHUMG00000017337 | 75772   |
| rs6416834  | 0.0022 | 17 | 76512161  | DNAH17;OTTHUMG00000150216        | 0       |
| rs4664544  | 0.0022 | 2  | 153092375 | AC079347.1                       | 48489   |
| rs4899651  | 0.0022 | 14 | 77784462  | POMT2                            | 0       |
| rs16851151 | 0.0023 | 3  | 140941086 | OTTHUMG00000160171;ACPL2         | -6482   |
| rs2049956  | 0.0023 | 6  | 166851540 | RPS6KA2;OTTHUMG00000016007       | 0       |
| rs12679480 | 0.0023 | 8  | 3605461   | CSMD1                            | 0       |
| rs7067899  | 0.0023 | 10 | 92891064  | RP11-56M3.1;OTTHUMG00000018739   | 21298   |
| rs1547925  | 0.0023 | 1  | 46085356  | CCDC17;OTTHUMG00000007822        | 360     |
| rs930653   | 0.0023 | 2  | 68464271  | PPP3R1;OTTHUMG00000129561        | 0       |
| rs6833290  | 0.0023 | 4  | 92252092  | FAM190A;OTTHUMG00000160950       | 0       |
| rs1390126  | 0.0023 | 8  | 34009803  | OTTHUMG00000158593;RP1-84O15.1   | 170473  |
| rs9869412  | 0.0023 | 3  | 69523979  | FRMD4B;OTTHUMG00000158772        | 0       |
| rs11980365 | 0.0023 | 7  | 73891383  | OTTHUMG00000023782;GTF2IRD1      | 0       |

|            |                                                                                  |    |           |                                   |        |
|------------|----------------------------------------------------------------------------------|----|-----------|-----------------------------------|--------|
| rs1323382  | 0.0023                                                                           | 9  | 111064686 | OTTHUMG000000020457;RP11-505C13.1 | -47586 |
| rs11254759 | 0.0023                                                                           | 10 | 6857307   | OTTHUMG000000017627;RP11-799O21.1 | 0      |
| rs1438929  | 0.0023                                                                           | 10 | 51043865  | OTTHUMG000000018201;PARG          | 0      |
| rs12631529 | 0.0023                                                                           | 3  | 157727846 | RP11-290K4.2;OTTHUMG000000158757  | 6159   |
| rs4951162  | 0.0029                                                                           | 1  | 205022977 | OTTHUMG000000037105;CNTN2         | 0      |
|            | <b>a - Single nucleotide polymorphism identification number for NCBI's dbSNP</b> |    |           |                                   |        |
